# Supplementary material
Source: publisher figshare collection journal article supplement (https://tandf.figshare.com/articles/dataset/_/5188636)
Supplement: Supplementary file 1 [file 1]

# Whistler Mountain, Snow Annual Density & Indices, January 1990 to April 2016

Corresponding to the Atmosphere Ocean paper: Author: Barton, M., email: mark.barton@canada.ca

Twenty-Seven Years of Manual Fresh Snowfall Density Measurements on Whistler Mountain, British Columbia

|    | Dec<br>to<br>Feb<br>season<br>end<br>Year | Dec<br>to<br>Feb<br>Mean<br>Snow<br>Density<br>(kg/m <sup>3</sup> ) | National Oceanic Atmospheric Administration Climate Index  |                 |        |                  |        |                  |        |                  |      |                  |
|----|-------------------------------------------|---------------------------------------------------------------------|------------------------------------------------------------|-----------------|--------|------------------|--------|------------------|--------|------------------|------|------------------|
|    |                                           |                                                                     | Mean value of December, January and February Climate Index |                 |        |                  |        |                  |        |                  |      |                  |
|    |                                           |                                                                     | AO                                                         | AO <sup>2</sup> | PDO    | PDO <sup>2</sup> | PNA    | PNA <sup>2</sup> | ONI    | ONI <sup>2</sup> | SOL  | SOL <sup>2</sup> |
| 1  | 1990                                      | 86.746                                                              | 1.253                                                      | 1.570           | -0.387 | 0.150            | -1.100 | 1.210            | 0.063  | 0.004            | 2005 | 4018154          |
| 2  | 1991                                      | 96.765                                                              | 0.375                                                      | 0.140           | -1.813 | 3.288            | -0.097 | 0.009            | 0.323  | 0.105            | 2258 | 5096607          |
| 3  | 1992                                      | 86.071                                                              | 1.095                                                      | 1.199           | 0.150  | 0.023            | 0.417  | 0.174            | 1.503  | 2.260            | 2245 | 5041672          |
| 4  | 1993                                      | 84.612                                                              | 1.769                                                      | 3.128           | 0.257  | 0.066            | -0.857 | 0.734            | 0.147  | 0.022            | 1342 | 1801501          |
| 5  | 1994                                      | 87.147                                                              | -0.418                                                     | 0.175           | 0.957  | 0.915            | -0.550 | 0.303            | 0.113  | 0.013            | 1065 | 1133231          |
| 6  | 1995                                      | 98.862                                                              | 0.723                                                      | 0.523           | -0.607 | 0.368            | 0.423  | 0.179            | 0.883  | 0.780            | 841  | 706945           |
| 7  | 1996                                      | 86.559                                                              | -1.055                                                     | 1.112           | 0.500  | 0.250            | -0.253 | 0.064            | -0.850 | 0.723            | 730  | 532462           |
| 8  | 1997                                      | 86.100                                                              | -0.096                                                     | 0.009           | 0.160  | 0.026            | -0.307 | 0.094            | -0.470 | 0.221            | 743  | 552247           |
| 9  | 1998                                      | 89.927                                                              | -0.778                                                     | 0.606           | 1.020  | 1.040            | 0.680  | 0.462            | 2.053  | 4.216            | 943  | 889123           |
| 10 | 1999                                      | 85.885                                                              | 0.648                                                      | 0.420           | -0.473 | 0.224            | -0.430 | 0.185            | -1.363 | 1.859            | 1449 | 2100954          |
| 11 | 2000                                      | 102.282                                                             | 1.130                                                      | 1.276           | -1.487 | 2.210            | -0.197 | 0.039            | -1.513 | 2.290            | 1673 | 2798371          |
| 12 | 2001                                      | 74.684                                                              | -1.312                                                     | 1.720           | 0.470  | 0.221            | 0.567  | 0.321            | -0.687 | 0.472            | 1627 | 2645502          |
| 13 | 2002                                      | 102.346                                                             | 0.454                                                      | 0.206           | -0.433 | 0.188            | -0.183 | 0.034            | -0.183 | 0.034            | 2247 | 5047661          |
| 14 | 2003                                      | 82.205                                                              | -0.645                                                     | 0.416           | 1.980  | 3.920            | 0.990  | 0.980            | 0.877  | 0.769            | 1419 | 2014791          |
| 15 | 2004                                      | 80.025                                                              | -0.983                                                     | 0.966           | 0.413  | 0.171            | 0.520  | 0.270            | 0.270  | 0.073            | 1121 | 1257314          |
| 16 | 2005                                      | 97.673                                                              | 0.105                                                      | 0.011           | 0.360  | 0.130            | -0.257 | 0.066            | 0.627  | 0.393            | 985  | 969634           |
| 17 | 2006                                      | 95.347                                                              | -0.810                                                     | 0.656           | 0.630  | 0.397            | 0.177  | 0.031            | -0.657 | 0.431            | 836  | 698283           |
| 18 | 2007                                      | 82.100                                                              | 1.003                                                      | 1.006           | 0.063  | 0.004            | 0.467  | 0.218            | 0.650  | 0.423            | 839  | 704480           |
| 19 | 2008                                      | 81.454                                                              | 0.859                                                      | 0.738           | -0.783 | 0.614            | -0.283 | 0.080            | -1.343 | 1.805            | 744  | 553834           |
| 20 | 2009                                      | 95.051                                                              | 0.259                                                      | 0.067           | -1.273 | 1.621            | -1.050 | 1.103            | -0.707 | 0.499            | 695  | 483488           |
| 21 | 2010                                      | 101.979                                                             | -3.422                                                     | 11.710          | 0.577  | 0.333            | 0.493  | 0.243            | 1.230  | 1.513            | 810  | 655506           |
| 22 | 2011                                      | 81.739                                                              | -0.913                                                     | 0.834           | -0.987 | 0.974            | -1.163 | 1.353            | -1.247 | 1.554            | 874  | 763468           |
| 23 | 2012                                      | 96.048                                                              | 0.655                                                      | 0.429           | -1.340 | 1.796            | 0.297  | 0.088            | -0.727 | 0.528            | 1277 | 1630814          |
| 24 | 2013                                      | 83.648                                                              | -1.122                                                     | 1.259           | -0.347 | 0.120            | -0.320 | 0.102            | -0.363 | 0.132            | 1132 | 1280669          |
| 25 | 2014                                      | 77.739                                                              | 0.183                                                      | 0.034           | 0.090  | 0.008            | -0.713 | 0.509            | -0.463 | 0.215            | 1603 | 2569823          |
| 26 | 2015                                      | 114.949                                                             | 0.849                                                      | 0.721           | 2.420  | 5.856            | 0.333  | 0.111            | 0.530  | 0.281            | 1433 | 2053871          |
| 27 | 2016                                      | 100.148                                                             | -0.010                                                     | 0.000           | 1.430  | 2.045            | 1.363  | 1.859            | 2.130  | 4.537            | 1066 | 1136996          |
