# Supplementary material
Source: publisher figshare collection journal article supplement (https://tandf.figshare.com/articles/dataset/_/5188636)
Supplement: Supplementary file 2 [file 1]

# Whistler Mountain, Pig Alley, Snow Dataset, January 1990 to April 2016

Corresponding to the Atmosphere Ocean paper: Author: Barton, M., email: mark.barton@canada.ca

Twenty-Seven Years of Manual Fresh Snowfall Density Measurements on Whistler Mountain, British Columbia

| Sample | Year | Month | Day | Time  | Sample Interval<br>Temperatures |             |             | Snow<br>Sample<br>Weight | Snow<br>Sample<br>Depth | Snow<br>Density      | Snow<br>Depth<br>to<br>Water<br>Depth<br>Ratio | Snow<br>Water<br>Equivalent<br>(mm H <sub>2</sub> O) | Air<br>Flow<br>Type<br>Inflow =1<br>Outflow=2<br>Other=3 | Depth<br>of<br>Snow<br>on<br>Ground<br>(cm) |
|--------|------|-------|-----|-------|---------------------------------|-------------|-------------|--------------------------|-------------------------|----------------------|------------------------------------------------|------------------------------------------------------|----------------------------------------------------------|---------------------------------------------|
|        |      |       |     |       | Max<br>(LST)                    | Min<br>(°C) | Avg<br>(°C) | (g)                      | (cm)                    | (kg/m <sup>3</sup> ) |                                                |                                                      |                                                          |                                             |
| 1      | 1990 | 1     | 7   | 7:30  | -0.5                            | -2.5        | -1.5        | 120.0                    | 35                      | 90.2                 | 11.1                                           | 31.6                                                 | 3                                                        | 156                                         |
| 2      | 1990 | 1     | 7   | 13:50 | -1.5                            | -2.0        | -1.8        | 30.0                     | 6                       | 131.6                | 7.6                                            | 7.9                                                  | 3                                                        | 158                                         |
| 3      | 1990 | 1     | 9   | 14:00 | -2.0                            | -3.0        | -2.5        | 36.0                     | 14                      | 67.7                 | 14.8                                           | 9.5                                                  | 3                                                        | 179                                         |
| 4      | 1990 | 1     | 22  | 8:55  | -0.5                            | -4.0        | -2.3        | 50.3                     | 13                      | 101.7                | 9.8                                            | 13.2                                                 | 3                                                        | 157                                         |
| 5      | 1990 | 1     | 25  | 9:45  | -1.5                            | -6.0        | -3.8        | 99.0                     | 31                      | 84.0                 | 11.9                                           | 26.1                                                 | 1                                                        | 188                                         |
| 6      | 1990 | 1     | 28  | 8:37  | -4.0                            | -8.0        | -6.0        | 23.7                     | 10                      | 62.4                 | 16.0                                           | 6.2                                                  | 2                                                        | 192                                         |
| 7      | 1990 | 1     | 28  | 13:50 | -3.5                            | -6.0        | -4.8        | 32.3                     | 11                      | 77.3                 | 12.9                                           | 8.5                                                  | 2                                                        | 200                                         |
| 8      | 1990 | 2     | 1   | 11:25 | -5.0                            | -13.5       | -9.3        | 29.0                     | 10                      | 76.3                 | 13.1                                           | 7.6                                                  | 2                                                        | 203                                         |
| 9      | 1990 | 2     | 2   | 13:45 | -2.5                            | -3.5        | -3.0        | 20.0                     | 6                       | 87.7                 | 11.4                                           | 5.3                                                  | 2                                                        | 206                                         |
| 10     | 1990 | 2     | 3   | 9:20  | -3.0                            | -5.0        | -4.0        | 133.0                    | 67                      | 52.2                 | 19.1                                           | 35.0                                                 | 1                                                        | 265                                         |
| 11     | 1990 | 2     | 5   | 8:25  | -6.0                            | -7.0        | -6.5        | 87.3                     | 32                      | 71.8                 | 13.9                                           | 23.0                                                 | 3                                                        | 265                                         |
| 12     | 1990 | 2     | 7   | 10:00 | -8.0                            | -11.0       | -9.5        | 42.3                     | 9                       | 123.5                | 8.1                                            | 11.1                                                 | 3                                                        | 254                                         |
| 13     | 1990 | 2     | 7   | 13:50 | -7.5                            | -10.0       | -8.8        | 19.9                     | 9                       | 61.5                 | 16.3                                           | 5.2                                                  | 3                                                        | 260                                         |
| 14     | 1990 | 2     | 10  | 8:10  | 0.0                             | -1.5        | -0.8        | 48.3                     | 18                      | 70.5                 | 14.2                                           | 12.7                                                 | 3                                                        | 257                                         |
| 15     | 1990 | 2     | 15  | 8:25  | -12.0                           | -14.5       | -13.3       | 32.9                     | 14                      | 61.8                 | 16.2                                           | 8.7                                                  | 2                                                        | 263                                         |
| 16     | 1990 | 2     | 20  | 8:00  | -3.0                            | -7.0        | -5.0        | 46.0                     | 12                      | 100.9                | 9.9                                            | 12.1                                                 | 3                                                        | 252                                         |
| 17     | 1990 | 2     | 20  | 13:50 | -1.5                            | -3.5        | -2.5        | 52.5                     | 9                       | 153.5                | 6.5                                            | 13.8                                                 | 3                                                        | 260                                         |
| 18     | 1990 | 3     | 7   | 7:50  | -2.0                            | -5.0        | -3.5        | 58.3                     | 26                      | 59.0                 | 17.0                                           | 15.3                                                 | 3                                                        | 269                                         |
| 19     | 1990 | 3     | 8   | 13:50 | -1.5                            | -12.0       | -6.8        | 48.4                     | 16                      | 79.6                 | 12.6                                           | 12.7                                                 | 3                                                        | 287                                         |
| 20     | 1990 | 3     | 10  | 7:45  | -3.0                            | -8.0        | -5.5        | 82.3                     | 33                      | 65.6                 | 15.2                                           | 21.7                                                 | 1                                                        | 309                                         |
| 21     | 1990 | 3     | 14  | 7:40  | -3.0                            | -6.0        | -4.5        | 25.4                     | 9                       | 74.2                 | 13.5                                           | 6.7                                                  | 1                                                        | 286                                         |
| 22     | 1990 | 4     | 25  | 9:00  | 0.0                             | -3.5        | -1.8        | 25.0                     | 9                       | 73.1                 | 13.7                                           | 6.6                                                  | 1                                                        | 195                                         |
| 23     | 1990 | 11    | 17  | 8:30  | 0.5                             | -7.0        | -3.3        | 60.5                     | 16                      | 99.5                 | 10.0                                           | 15.9                                                 | 3                                                        | 87                                          |
| 24     | 1990 | 11    | 22  | 11:30 | 0.5                             | -4.5        | -2.0        | 29.0                     | 6                       | 127.2                | 7.9                                            | 7.6                                                  | 1                                                        | 94                                          |
| 25     | 1990 | 11    | 25  | 8:40  | -5.0                            | -8.5        | -6.8        | 62.5                     | 6                       | 274.1                | 3.6                                            | 16.4                                                 | 3                                                        | 112                                         |
| 26     | 1990 | 12    | 1   | 13:35 | -6.5                            | -8.5        | -7.5        | 32.5                     | 8                       | 106.9                | 9.4                                            | 8.6                                                  | 3                                                        | 153                                         |
| 27     | 1990 | 12    | 3   | 8:05  | -1.0                            | -7.5        | -4.3        | 73.5                     | 21                      | 92.1                 | 10.9                                           | 19.3                                                 | 2                                                        | 165                                         |
| 28     | 1990 | 12    | 3   | 13:50 | 0.0                             | -1.0        | -0.5        | 43.5                     | 17                      | 67.3                 | 14.9                                           | 11.4                                                 | 2                                                        | 179                                         |
| 29     | 1990 | 12    | 8   | 10:20 | -1.0                            | -3.0        | -2.0        | 120.8                    | 33                      | 96.3                 | 10.4                                           | 31.8                                                 | 3                                                        | 231                                         |
| 30     | 1990 | 12    | 9   | 13:45 | -3.5                            | -4.0        | -3.8        | 37.8                     | 12                      | 82.8                 | 12.1                                           | 9.9                                                  | 2                                                        | 243                                         |
| 31     | 1990 | 12    | 30  | 13:45 | -8.0                            | -10.5       | -9.3        | 15.2                     | 6                       | 66.7                 | 15.0                                           | 4.0                                                  | 2                                                        | 213                                         |
| 32     | 1990 | 12    | 31  | 10:32 | -3.5                            | -8.5        | -6.0        | 56.1                     | 18                      | 82.0                 | 12.2                                           | 14.8                                                 | 2                                                        | 222                                         |
| 33     | 1991 | 1     | 11  | 13:30 | 0.5                             | 0.0         | 0.3         | 53.0                     | 16                      | 87.2                 | 11.5                                           | 13.9                                                 | 2                                                        | 251                                         |
| 34     | 1991 | 1     | 12  | 8:10  | 0.5                             | -2.0        | -0.8        | 119.5                    | 26                      | 121.0                | 8.3                                            | 31.4                                                 | 1                                                        | 265                                         |

| Sample | Year | Month | Day | Time  | Sample Interval<br>Temperatures |             |             | Snow<br>Sample<br>Weight | Snow<br>Sample<br>Depth | Snow<br>Density      | Snow<br>Depth<br>to<br>Water<br>Depth | Snow<br>Water<br>Equivalent | Air<br>Flow<br>Type<br>Inflow =1<br>Outflow=2<br>Other=3 | Depth<br>of<br>Snow<br>on<br>Ground<br>(cm) |
|--------|------|-------|-----|-------|---------------------------------|-------------|-------------|--------------------------|-------------------------|----------------------|---------------------------------------|-----------------------------|----------------------------------------------------------|---------------------------------------------|
|        |      |       |     |       | Max<br>(LST)                    | Min<br>(°C) | Avg<br>(°C) | (g)                      | (cm)                    | (kg/m <sup>3</sup> ) | Ratio                                 | (mm H <sub>2</sub> O)       |                                                          |                                             |
| 35     | 1991 | 1     | 13  | 7:10  | -0.5                            | -2.0        | -1.3        | 30.8                     | 7                       | 115.8                | 8.6                                   | 8.1                         | 1                                                        | 272                                         |
| 36     | 1991 | 2     | 1   | 6:40  | 0.5                             | -1.0        | -0.3        | 80.3                     | 26                      | 81.2                 | 12.3                                  | 21.1                        | 2                                                        | 267                                         |
| 37     | 1991 | 2     | 1   | 13:45 | 0.5                             | 0.0         | 0.3         | 134.5                    | 35                      | 101.1                | 9.9                                   | 35.4                        | 2                                                        | 296                                         |
| 38     | 1991 | 2     | 2   | 6:30  | 1.0                             | 0.5         | 0.8         | 239.5                    | 40                      | 157.6                | 6.3                                   | 63.0                        | 3                                                        | 320                                         |
| 39     | 1991 | 3     | 2   | 7:20  | -3.5                            | -14.0       | -8.8        | 157.5                    | 48                      | 86.3                 | 11.6                                  | 41.4                        | 3                                                        | 335                                         |
| 40     | 1991 | 11    | 24  | 6:30  | 0.5                             | -3.5        | -1.5        | 23.0                     | 6                       | 100.9                | 9.9                                   | 6.1                         | 1                                                        | 105                                         |
| 41     | 1991 | 11    | 25  | 6:00  | 1.0                             | -2.0        | -0.5        | 56.0                     | 8                       | 184.2                | 5.4                                   | 14.7                        | 1                                                        | 108                                         |
| 42     | 1991 | 12    | 5   | 13:50 | 1.0                             | -0.5        | 0.3         | 179.8                    | 18                      | 262.9                | 3.8                                   | 47.3                        | 1                                                        | 119                                         |
| 43     | 1991 | 12    | 6   | 6:15  | 1.5                             | -3.0        | -0.8        | 67.8                     | 9                       | 198.2                | 5.0                                   | 17.8                        | 1                                                        | 120                                         |
| 44     | 1991 | 12    | 6   | 13:36 | -2.0                            | -3.0        | -2.5        | 40.2                     | 15                      | 70.5                 | 14.2                                  | 10.6                        | 1                                                        | 134                                         |
| 45     | 1991 | 12    | 8   | 6:10  | -3.0                            | -5.5        | -4.3        | 30.5                     | 10                      | 80.3                 | 12.5                                  | 8.0                         | 1                                                        | 133                                         |
| 46     | 1991 | 12    | 9   | 6:10  | -1.0                            | -3.5        | -2.3        | 69.5                     | 27                      | 67.7                 | 14.8                                  | 18.3                        | 1                                                        | 154                                         |
| 47     | 1991 | 12    | 11  | 6:00  | -3.0                            | -5.0        | -4.0        | 70.0                     | 18                      | 102.3                | 9.8                                   | 18.4                        | 1                                                        | 155                                         |
| 48     | 1991 | 12    | 12  | 6:00  | -2.5                            | -7.5        | -5.0        | 46.0                     | 17                      | 71.2                 | 14.0                                  | 12.1                        | 1                                                        | 165                                         |
| 49     | 1991 | 12    | 18  | 13:45 | -0.5                            | -3.0        | -1.8        | 15.4                     | 7                       | 57.9                 | 17.3                                  | 4.1                         | 3                                                        | 146                                         |
| 50     | 1991 | 12    | 26  | 6:00  | 0.5                             | 0.0         | 0.3         | 25.7                     | 7                       | 96.6                 | 10.4                                  | 6.8                         | 3                                                        | 145                                         |
| 51     | 1992 | 1     | 1   | 6:00  | -1.5                            | -2.5        | -2.0        | 40.6                     | 10                      | 106.8                | 9.4                                   | 10.7                        | 3                                                        | 145                                         |
| 52     | 1992 | 1     | 1   | 13:43 | -1.5                            | -2.0        | -1.8        | 19.5                     | 5                       | 102.6                | 9.7                                   | 5.1                         | 3                                                        | 154                                         |
| 53     | 1992 | 1     | 2   | 5:50  | -2.0                            | -4.5        | -3.3        | 101.6                    | 26                      | 102.8                | 9.7                                   | 26.7                        | 1                                                        | 170                                         |
| 54     | 1992 | 1     | 2   | 13:48 | -4.5                            | -6.0        | -5.3        | 135.1                    | 33                      | 107.7                | 9.3                                   | 35.6                        | 1                                                        | 168                                         |
| 55     | 1992 | 1     | 4   | 5:50  | -2.0                            | -5.5        | -3.8        | 44.0                     | 16                      | 72.4                 | 13.8                                  | 11.6                        | 3                                                        | 179                                         |
| 56     | 1992 | 1     | 4   | 13:34 | -3.0                            | -5.5        | -4.3        | 15.6                     | 7                       | 58.6                 | 17.1                                  | 4.1                         | 3                                                        | 183                                         |
| 57     | 1992 | 1     | 10  | 13:40 | -0.5                            | -2.0        | -1.3        | 47.1                     | 11                      | 112.7                | 8.9                                   | 12.4                        | 3                                                        | 186                                         |
| 58     | 1992 | 1     | 16  | 5:50  | 0.0                             | -6.0        | -3.0        | 51.0                     | 14                      | 95.9                 | 10.4                                  | 13.4                        | 2                                                        | 187                                         |
| 59     | 1992 | 1     | 20  | 13:30 | 0.0                             | -2.5        | -1.3        | 19.5                     | 7                       | 73.3                 | 13.6                                  | 5.1                         | 3                                                        | 185                                         |
| 60     | 1992 | 1     | 21  | 5:50  | -2.0                            | -9.0        | -5.5        | 58.5                     | 16                      | 96.2                 | 10.4                                  | 15.4                        | 3                                                        | 197                                         |
| 61     | 1992 | 1     | 22  | 5:50  | -5.5                            | -8.0        | -6.8        | 16.6                     | 7                       | 62.4                 | 16.0                                  | 4.4                         | 3                                                        | 203                                         |
| 62     | 1992 | 1     | 22  | 13:09 | -3.0                            | -8.0        | -5.5        | 19.4                     | 7                       | 72.9                 | 13.7                                  | 5.1                         | 3                                                        | 209                                         |
| 63     | 1992 | 1     | 23  | 6:00  | -1.5                            | -5.0        | -3.3        | 93.8                     | 27                      | 91.4                 | 10.9                                  | 24.7                        | 3                                                        | 227                                         |
| 64     | 1992 | 1     | 24  | 5:50  | 0.0                             | -4.0        | -2.0        | 93.1                     | 29                      | 84.5                 | 11.8                                  | 24.5                        | 3                                                        | 257                                         |
| 65     | 1992 | 1     | 27  | 13:50 | 0.5                             | -1.5        | -0.5        | 105.5                    | 14                      | 198.3                | 5.0                                   | 27.8                        | 3                                                        | 265                                         |
| 66     | 1992 | 1     | 28  | 6:00  | 0.5                             | -1.5        | -0.5        | 88.0                     | 20                      | 115.8                | 8.6                                   | 23.2                        | 3                                                        | 278                                         |
| 67     | 1992 | 1     | 29  | 5:50  | -0.5                            | -2.5        | -1.5        | 57.4                     | 19                      | 79.5                 | 12.6                                  | 15.1                        | 3                                                        | 281                                         |
| 68     | 1992 | 1     | 30  | 6:00  | 0.5                             | -0.5        | 0.0         | 257.6                    | 62                      | 109.3                | 9.1                                   | 67.8                        | 3                                                        | 349                                         |
| 69     | 1992 | 1     | 30  | 14:00 | 0.5                             | -1.0        | -0.3        | 44.9                     | 9                       | 131.3                | 7.6                                   | 11.8                        | 1                                                        | 326                                         |
| 70     | 1992 | 1     | 31  | 6:00  | -0.5                            | -2.5        | -1.5        | 66.3                     | 19                      | 91.8                 | 10.9                                  | 17.4                        | 3                                                        | 325                                         |
| 71     | 1992 | 1     | 31  | 13:59 | 1.0                             | -0.5        | 0.3         | 56.5                     | 14                      | 106.2                | 9.4                                   | 14.9                        | 3                                                        | 329                                         |
| 72     | 1992 | 2     | 2   | 5:50  | -0.5                            | -5.5        | -3.0        | 33.0                     | 9                       | 96.5                 | 10.4                                  | 8.7                         | 3                                                        | 316                                         |
| 73     | 1992 | 2     | 3   | 5:50  | 1.0                             | -1.5        | -0.3        | 45.0                     | 7                       | 169.2                | 5.9                                   | 11.8                        | 3                                                        | 313                                         |
| 74     | 1992 | 2     | 15  | 13:55 | -2.5                            | -3.5        | -3.0        | 19.0                     | 5                       | 100.0                | 10.0                                  | 5.0                         | 1                                                        | 276                                         |

| Sample | Year | Month | Day | Time  | Sample Interval<br>Temperatures |             |             | Snow<br>Sample<br>Weight | Snow<br>Sample<br>Depth | Snow<br>Density      | Snow<br>Depth<br>to<br>Water<br>Depth | Snow<br>Water<br>Equivalent | Air<br>Flow<br>Type               | Depth<br>of<br>Snow<br>on<br>Ground |
|--------|------|-------|-----|-------|---------------------------------|-------------|-------------|--------------------------|-------------------------|----------------------|---------------------------------------|-----------------------------|-----------------------------------|-------------------------------------|
|        |      |       |     |       | Max<br>(LST)                    | Min<br>(°C) | Avg<br>(°C) | (g)                      | (cm)                    | (kg/m <sup>3</sup> ) | Ratio                                 | (mm H <sub>2</sub> O)       | Inflow =1<br>Outflow=2<br>Other=3 | (cm)                                |
| 75     | 1992 | 2     | 17  | 13:45 | -3.0                            | -4.5        | -3.8        | 31.8                     | 13                      | 64.4                 | 15.5                                  | 8.4                         | 3                                 | 284                                 |
| 76     | 1992 | 2     | 18  | 5:50  | -3.5                            | -6.0        | -4.8        | 81.5                     | 32                      | 67.0                 | 14.9                                  | 21.4                        | 3                                 | 309                                 |
| 77     | 1992 | 2     | 18  | 14:20 | -4.5                            | -6.0        | -5.3        | 35.3                     | 12                      | 77.4                 | 12.9                                  | 9.3                         | 1                                 | 311                                 |
| 78     | 1992 | 2     | 22  | 5:50  | -0.5                            | -3.0        | -1.8        | 54.0                     | 12                      | 118.4                | 8.4                                   | 14.2                        | 1                                 | 325                                 |
| 79     | 1992 | 3     | 1   | 5:50  | 1.5                             | -1.5        | 0.0         | 18.8                     | 7                       | 70.5                 | 14.2                                  | 4.9                         | 3                                 | 293                                 |
| 80     | 1992 | 3     | 2   | 5:50  | 2.5                             | 0.0         | 1.3         | 24.0                     | 5                       | 126.3                | 7.9                                   | 6.3                         | 1                                 | 290                                 |
| 81     | 1992 | 3     | 4   | 13:30 | 1.0                             | -1.0        | 0.0         | 21.0                     | 8                       | 69.1                 | 14.5                                  | 5.5                         | 3                                 | 290                                 |
| 82     | 1992 | 3     | 5   | 5:50  | 0.0                             | -1.5        | -0.8        | 40.1                     | 12                      | 87.9                 | 11.4                                  | 10.6                        | 3                                 | 298                                 |
| 83     | 1992 | 4     | 5   | 6:25  | 0.0                             | -6.0        | -3.0        | 17.0                     | 6                       | 74.6                 | 13.4                                  | 4.5                         | 1                                 | 255                                 |
| 84     | 1992 | 4     | 5   | 13:40 | -3.5                            | -6.0        | -4.8        | 18.8                     | 10                      | 49.5                 | 20.2                                  | 4.9                         | 1                                 | 262                                 |
| 85     | 1993 | 1     | 20  | 5:45  | -3.5                            | -5.0        | -4.3        | 29.3                     | 10                      | 77.1                 | 13.0                                  | 7.7                         | 3                                 | 114                                 |
| 86     | 1993 | 1     | 21  | 5:45  | -3.5                            | -7.0        | -5.3        | 37.5                     | 12                      | 82.2                 | 12.2                                  | 9.9                         | 3                                 | 138                                 |
| 87     | 1993 | 1     | 21  | 14:00 | -6.5                            | -7.5        | -7.0        | 14.0                     | 6                       | 61.4                 | 16.3                                  | 3.7                         | 3                                 | 142                                 |
| 88     | 1993 | 1     | 24  | 13:45 | -2.0                            | -2.5        | -2.3        | 65.0                     | 17                      | 100.6                | 9.9                                   | 17.1                        | 3                                 | 153                                 |
| 89     | 1993 | 1     | 25  | 6:00  | 1.0                             | -1.5        | -0.3        | 98.2                     | 32                      | 80.8                 | 12.4                                  | 25.8                        | 3                                 | 177                                 |
| 90     | 1993 | 1     | 26  | 14:00 | 0.0                             | -4.0        | -2.0        | 69.2                     | 22                      | 82.8                 | 12.1                                  | 18.2                        | 2                                 | 184                                 |
| 91     | 1993 | 1     | 27  | 6:00  | 0.0                             | -4.0        | -2.0        | 127.0                    | 37                      | 90.3                 | 11.1                                  | 33.4                        | 2                                 | 213                                 |
| 92     | 1993 | 1     | 27  | 14:15 | 0.0                             | -2.0        | -1.0        | 32.2                     | 9                       | 94.2                 | 10.6                                  | 8.5                         | 2                                 | 215                                 |
| 93     | 1993 | 1     | 28  | 5:50  | 0.0                             | -2.0        | -1.0        | 28.0                     | 7                       | 105.3                | 9.5                                   | 7.4                         | 2                                 | 215                                 |
| 94     | 1993 | 3     | 3   | 6:15  | -0.5                            | -5.0        | -2.8        | 27.5                     | 11                      | 65.8                 | 15.2                                  | 7.2                         | 3                                 | 172                                 |
| 95     | 1993 | 3     | 3   | 13:55 | 0.5                             | -1.0        | -0.3        | 21.0                     | 7                       | 78.9                 | 12.7                                  | 5.5                         | 3                                 | 180                                 |
| 96     | 1993 | 3     | 4   | 6:15  | 0.0                             | -2.5        | -1.3        | 73.0                     | 32                      | 60.0                 | 16.7                                  | 19.2                        | 3                                 | 204                                 |
| 97     | 1993 | 3     | 4   | 13:30 | 0.0                             | -2.5        | -1.3        | 84.5                     | 13                      | 171.1                | 5.8                                   | 22.2                        | 3                                 | 209                                 |
| 98     | 1993 | 3     | 5   | 6:10  | 0.0                             | -4.5        | -2.3        | 33.0                     | 10                      | 86.8                 | 11.5                                  | 8.7                         | 3                                 | 217                                 |
| 99     | 1993 | 3     | 17  | 7:35  | -4.0                            | -7.5        | -5.8        | 28.0                     | 8                       | 92.1                 | 10.9                                  | 7.4                         | 2                                 | 187                                 |
| 100    | 1993 | 3     | 17  | 13:35 | 0.5                             | -7.5        | -3.5        | 46.0                     | 14                      | 86.5                 | 11.6                                  | 12.1                        | 2                                 | 198                                 |
| 101    | 1993 | 3     | 18  | 5:45  | -1.0                            | -5.0        | -3.0        | 52.0                     | 15                      | 91.2                 | 11.0                                  | 13.7                        | 1                                 | 208                                 |
| 102    | 1993 | 3     | 22  | 13:40 | 0.5                             | -1.5        | -0.5        | 89.8                     | 23                      | 102.7                | 9.7                                   | 23.6                        | 3                                 | 231                                 |
| 103    | 1993 | 3     | 23  | 5:45  | 1.5                             | -1.5        | 0.0         | 73.8                     | 20                      | 97.1                 | 10.3                                  | 19.4                        | 1                                 | 242                                 |
| 104    | 1993 | 4     | 8   | 5:45  | 2.0                             | -2.0        | 0.0         | 67.5                     | 21                      | 84.6                 | 11.8                                  | 17.8                        | 3                                 | 237                                 |
| 105    | 1993 | 4     | 8   | 13:50 | 1.5                             | -0.5        | 0.5         | 54.0                     | 14                      | 101.5                | 9.9                                   | 14.2                        | 3                                 | 246                                 |
| 106    | 1993 | 4     | 9   | 5:45  | 2.0                             | -2.0        | 0.0         | 44.0                     | 13                      | 89.1                 | 11.2                                  | 11.6                        | 1                                 | 252                                 |
| 107    | 1993 | 4     | 12  | 6:20  | 2.0                             | -4.0        | -1.0        | 16.6                     | 5                       | 87.4                 | 11.4                                  | 4.4                         | 1                                 | 239                                 |
| 108    | 1993 | 4     | 17  | 5:45  | 0.0                             | -2.0        | -1.0        | 26.0                     | 11                      | 62.2                 | 16.1                                  | 6.8                         | 3                                 | 245                                 |
| 109    | 1993 | 12    | 4   | 6:00  | 1.0                             | -3.5        | -1.3        | 124.0                    | 31                      | 105.3                | 9.5                                   | 32.6                        | 3                                 | 108                                 |
| 110    | 1993 | 12    | 9   | 6:20  | -2.5                            | -4.0        | -3.3        | 35.0                     | 13                      | 70.9                 | 14.1                                  | 9.2                         | 3                                 | 115                                 |
| 111    | 1993 | 12    | 10  | 6:00  | 1.0                             | -2.0        | -0.5        | 261.0                    | 23                      | 298.6                | 3.3                                   | 68.7                        | 3                                 | 131                                 |
| 112    | 1993 | 12    | 13  | 6:00  | -2.0                            | -5.5        | -3.8        | 55.5                     | 24                      | 60.9                 | 16.4                                  | 14.6                        | 3                                 | 161                                 |
| 113    | 1993 | 12    | 13  | 13:40 | -1.5                            | -2.5        | -2.0        | 57.5                     | 20                      | 75.7                 | 13.2                                  | 15.1                        | 3                                 | 178                                 |
| 114    | 1993 | 12    | 14  | 6:15  | -2.0                            | -3.0        | -2.5        | 36.8                     | 12                      | 80.7                 | 12.4                                  | 9.7                         | 3                                 | 176                                 |

| Sample | Year | Month | Day | Time  | Sample Interval<br>Temperatures |             |             | Snow<br>Sample<br>Weight | Snow<br>Sample<br>Depth | Snow<br>Density      | Snow<br>Depth<br>to<br>Water<br>Depth | Snow<br>Water<br>Equivalent | Air<br>Flow<br>Type               | Depth<br>of<br>Snow<br>on<br>Ground |
|--------|------|-------|-----|-------|---------------------------------|-------------|-------------|--------------------------|-------------------------|----------------------|---------------------------------------|-----------------------------|-----------------------------------|-------------------------------------|
|        |      |       |     |       | Max<br>(LST)                    | Min<br>(°C) | Avg<br>(°C) | (g)                      | (cm)                    | (kg/m <sup>3</sup> ) | Ratio                                 | (mm H <sub>2</sub> O)       | Inflow =1<br>Outflow=2<br>Other=3 | (cm)                                |
| 115    | 1994 | 1     | 1   | 5:55  | -1.0                            | -3.0        | -2.0        | 33.9                     | 11                      | 81.1                 | 12.3                                  | 8.9                         | 3                                 | 154                                 |
| 116    | 1994 | 1     | 2   | 13:31 | 0.5                             | -1.5        | -0.5        | 39.5                     | 10                      | 103.9                | 9.6                                   | 10.4                        | 3                                 | 159                                 |
| 117    | 1994 | 1     | 4   | 13:30 | 0.5                             | -1.5        | -0.5        | 45.5                     | 19                      | 63.0                 | 15.9                                  | 12.0                        | 3                                 | 195                                 |
| 118    | 1994 | 2     | 12  | 13:30 | -4.0                            | -5.5        | -4.8        | 44.2                     | 16                      | 72.7                 | 13.8                                  | 11.6                        | 1                                 | 200                                 |
| 119    | 1994 | 2     | 13  | 6:00  | -5.0                            | -6.5        | -5.8        | 174.6                    | 55                      | 83.5                 | 12.0                                  | 45.9                        | 1                                 | 240                                 |
| 120    | 1994 | 2     | 14  | 14:02 | -4.5                            | -6.5        | -5.5        | 30.3                     | 12                      | 66.4                 | 15.0                                  | 8.0                         | 1                                 | 240                                 |
| 121    | 1994 | 2     | 15  | 6:10  | -4.0                            | -4.5        | -4.3        | 132.0                    | 82                      | 42.4                 | 23.6                                  | 34.7                        | 1                                 | 309                                 |
| 122    | 1994 | 2     | 16  | 5:50  | -2.5                            | -7.5        | -5.0        | 30.0                     | 11                      | 71.8                 | 13.9                                  | 7.9                         | 3                                 | 287                                 |
| 123    | 1994 | 2     | 16  | 13:35 | -1.5                            | -3.0        | -2.3        | 81.0                     | 32                      | 66.6                 | 15.0                                  | 21.3                        | 3                                 | 310                                 |
| 124    | 1994 | 2     | 17  | 5:50  | -1.0                            | -2.0        | -1.5        | 72.0                     | 33                      | 57.4                 | 17.4                                  | 18.9                        | 3                                 | 323                                 |
| 125    | 1994 | 2     | 17  | 14:15 | -0.5                            | -1.5        | -1.0        | 25.1                     | 7                       | 94.4                 | 10.6                                  | 6.6                         | 3                                 | 317                                 |
| 126    | 1994 | 2     | 20  | 14:15 | -4.0                            | -7.5        | -5.8        | 43.0                     | 21                      | 53.9                 | 18.6                                  | 11.3                        | 2                                 | 307                                 |
| 127    | 1994 | 2     | 21  | 6:00  | -4.0                            | -5.5        | -4.8        | 50.0                     | 18                      | 73.1                 | 13.7                                  | 13.2                        | 3                                 | 309                                 |
| 128    | 1994 | 2     | 22  | 5:50  | -3.0                            | -9.0        | -6.0        | 14.2                     | 6                       | 62.1                 | 16.1                                  | 3.7                         | 3                                 | 303                                 |
| 129    | 1994 | 2     | 22  | 13:50 | -5.5                            | -8.0        | -6.8        | 19.9                     | 6                       | 87.3                 | 11.5                                  | 5.2                         | 3                                 | 305                                 |
| 130    | 1994 | 2     | 25  | 6:15  | -12.0                           | -16.0       | -14.0       | 20.5                     | 6                       | 89.9                 | 11.1                                  | 5.4                         | 2                                 | 292                                 |
| 131    | 1994 | 3     | 16  | 6:10  | 0.0                             | -4.0        | -2.0        | 29.5                     | 10                      | 77.6                 | 12.9                                  | 7.8                         | 1                                 | 270                                 |
| 132    | 1994 | 3     | 17  | 5:45  | -3.5                            | -6.5        | -5.0        | 25.0                     | 7                       | 94.0                 | 10.6                                  | 6.6                         | 1                                 | 276                                 |
| 133    | 1994 | 3     | 17  | 13:45 | -4.0                            | -5.0        | -4.5        | 14.0                     | 7                       | 52.6                 | 19.0                                  | 3.7                         | 1                                 | 284                                 |
| 134    | 1994 | 3     | 18  | 5:05  | -2.0                            | -6.0        | -4.0        | 45.0                     | 15                      | 78.9                 | 12.7                                  | 11.8                        | 1                                 | 293                                 |
| 135    | 1994 | 3     | 20  | 6:05  | -4.5                            | -6.0        | -5.3        | 17.4                     | 10                      | 45.8                 | 21.8                                  | 4.6                         | 3                                 | 295                                 |
| 136    | 1994 | 3     | 21  | 5:50  | -3.5                            | -6.0        | -4.8        | 106.3                    | 33                      | 84.8                 | 11.8                                  | 28.0                        | 1                                 | 320                                 |
| 137    | 1994 | 11    | 19  | 13:30 | -2.5                            | -3.5        | -3.0        | 61.1                     | 19                      | 84.6                 | 11.8                                  | 16.1                        | 1                                 | 114                                 |
| 138    | 1994 | 11    | 23  | 5:55  | -5.5                            | -8.0        | -6.8        | 135.0                    | 50                      | 71.1                 | 14.1                                  | 35.5                        | 1                                 | 155                                 |
| 139    | 1994 | 11    | 25  | 6:00  | -2.5                            | -6.5        | -4.5        | 75.3                     | 30                      | 66.1                 | 15.1                                  | 19.8                        | 3                                 | 160                                 |
| 140    | 1994 | 11    | 27  | 6:20  | -6.0                            | -9.5        | -7.8        | 15.8                     | 8                       | 51.8                 | 19.3                                  | 4.1                         | 3                                 | 150                                 |
| 141    | 1994 | 11    | 29  | 5:50  | -3.5                            | -6.0        | -4.8        | 52.0                     | 18                      | 76.0                 | 13.2                                  | 13.7                        | 1                                 | 153                                 |
| 142    | 1994 | 11    | 30  | 5:45  | 1.5                             | 0.0         | 0.8         | 81.5                     | 11                      | 195.0                | 5.1                                   | 21.4                        | 1                                 | 153                                 |
| 143    | 1994 | 12    | 1   | 13:30 | -5.5                            | -7.0        | -6.3        | 40.1                     | 15                      | 70.4                 | 14.2                                  | 10.6                        | 1                                 | 158                                 |
| 144    | 1994 | 12    | 15  | 6:05  | -5.0                            | -7.0        | -6.0        | 17.4                     | 8                       | 57.3                 | 17.5                                  | 4.6                         | 3                                 | 153                                 |
| 145    | 1994 | 12    | 16  | 6:15  | -3.5                            | -5.0        | -4.3        | 51.0                     | 22                      | 61.0                 | 16.4                                  | 13.4                        | 3                                 | 171                                 |
| 146    | 1994 | 12    | 17  | 6:00  | 0.0                             | -3.5        | -1.8        | 37.0                     | 13                      | 74.9                 | 13.4                                  | 9.7                         | 2                                 | 180                                 |
| 147    | 1994 | 12    | 18  | 6:00  | 0.5                             | -1.0        | -0.3        | 75.0                     | 20                      | 98.7                 | 10.1                                  | 19.7                        | 3                                 | 188                                 |
| 148    | 1994 | 12    | 19  | 6:00  | -0.5                            | -4.0        | -2.3        | 36.0                     | 10                      | 94.7                 | 10.6                                  | 9.5                         | 3                                 | 189                                 |
| 149    | 1994 | 12    | 19  | 13:50 | -0.5                            | -2.5        | -1.5        | 143.0                    | 39                      | 96.5                 | 10.4                                  | 37.6                        | 3                                 | 223                                 |
| 150    | 1994 | 12    | 20  | 6:00  | 0.5                             | -1.0        | -0.3        | 127.0                    | 39                      | 85.7                 | 11.7                                  | 33.4                        | 3                                 | 243                                 |
| 151    | 1994 | 12    | 26  | 6:15  | -0.5                            | -6.0        | -3.3        | 136.5                    | 44                      | 81.6                 | 12.2                                  | 35.9                        | 2                                 | 253                                 |
| 152    | 1994 | 12    | 27  | 13:40 | -3.5                            | -4.5        | -4.0        | 82.7                     | 19                      | 114.5                | 8.7                                   | 21.8                        | 2                                 | 275                                 |
| 153    | 1994 | 12    | 28  | 6:50  | -0.5                            | -4.5        | -2.5        | 97.3                     | 24                      | 106.7                | 9.4                                   | 25.6                        | 1                                 | 286                                 |
| 154    | 1995 | 1     | 8   | 13:40 | 0.0                             | -2.5        | -1.3        | 35.0                     | 13                      | 70.9                 | 14.1                                  | 9.2                         | 2                                 | 248                                 |

| Sample | Year | Month | Day | Time  | Sample Interval<br>Temperatures |             |             | Snow<br>Sample<br>Weight | Snow<br>Sample<br>Depth | Snow<br>Density      | Snow<br>Depth<br>to<br>Water<br>Depth | Snow<br>Water<br>Equivalent | Air<br>Flow<br>Type               | Depth<br>of<br>Snow<br>on<br>Ground |
|--------|------|-------|-----|-------|---------------------------------|-------------|-------------|--------------------------|-------------------------|----------------------|---------------------------------------|-----------------------------|-----------------------------------|-------------------------------------|
|        |      |       |     |       | Max<br>(LST)                    | Min<br>(°C) | Avg<br>(°C) | (g)                      | (cm)                    | (kg/m <sup>3</sup> ) | Ratio                                 | (mm H <sub>2</sub> O)       | Inflow =1<br>Outflow=2<br>Other=3 | (cm)                                |
| 155    | 1995 | 1     | 9   | 5:45  | -1.0                            | -4.5        | -2.8        | 31.5                     | 10                      | 82.9                 | 12.1                                  | 8.3                         | 2                                 | 250                                 |
| 156    | 1995 | 1     | 10  | 5:45  | 0.5                             | -1.0        | -0.3        | 54.0                     | 13                      | 109.3                | 9.1                                   | 14.2                        | 3                                 | 262                                 |
| 157    | 1995 | 1     | 12  | 6:00  | -1.5                            | -3.5        | -2.5        | 26.7                     | 13                      | 54.0                 | 18.5                                  | 7.0                         | 3                                 | 269                                 |
| 158    | 1995 | 1     | 15  | 6:15  | -3.0                            | -4.5        | -3.8        | 20.0                     | 8                       | 65.8                 | 15.2                                  | 5.3                         | 3                                 | 271                                 |
| 159    | 1995 | 1     | 18  | 6:00  | -1.5                            | -6.0        | -3.8        | 36.5                     | 10                      | 96.1                 | 10.4                                  | 9.6                         | 1                                 | 268                                 |
| 160    | 1995 | 1     | 18  | 13:30 | -1.0                            | -1.5        | -1.3        | 29.2                     | 9                       | 85.4                 | 11.7                                  | 7.7                         | 3                                 | 273                                 |
| 161    | 1995 | 2     | 3   | 5:50  | 1.0                             | -2.5        | -0.8        | 53.5                     | 15                      | 93.9                 | 10.7                                  | 14.1                        | 3                                 | 266                                 |
| 162    | 1995 | 2     | 15  | 6:00  | -10.5                           | -13.5       | -12.0       | 43.8                     | 15                      | 76.8                 | 13.0                                  | 11.5                        | 1                                 | 255                                 |
| 163    | 1995 | 2     | 17  | 14:20 | -1.0                            | -3.0        | -2.0        | 27.4                     | 9                       | 80.1                 | 12.5                                  | 7.2                         | 1                                 | 278                                 |
| 164    | 1995 | 2     | 18  | 13:40 | -1.0                            | -2.5        | -1.8        | 55.0                     | 19                      | 76.2                 | 13.1                                  | 14.5                        | 1                                 | 295                                 |
| 165    | 1995 | 2     | 19  | 5:40  | 1.5                             | -1.0        | 0.3         | 65.0                     | 10                      | 171.1                | 5.8                                   | 17.1                        | 3                                 | 295                                 |
| 166    | 1995 | 3     | 8   | 13:50 | -0.5                            | -4.5        | -2.5        | 31.0                     | 9                       | 90.6                 | 11.0                                  | 8.2                         | 2                                 | 286                                 |
| 167    | 1995 | 3     | 9   | 5:45  | 0.5                             | -2.5        | -1.0        | 64.0                     | 16                      | 105.3                | 9.5                                   | 16.8                        | 3                                 | 296                                 |
| 168    | 1995 | 3     | 11  | 5:45  | 1.0                             | -1.5        | -0.3        | 34.5                     | 12                      | 75.7                 | 13.2                                  | 9.1                         | 1                                 | 305                                 |
| 169    | 1995 | 3     | 12  | 6:00  | 1.0                             | -5.5        | -2.3        | 24.1                     | 7                       | 90.6                 | 11.0                                  | 6.3                         | 1                                 | 312                                 |
| 170    | 1995 | 3     | 14  | 5:45  | 0.5                             | -2.5        | -1.0        | 36.0                     | 11                      | 86.1                 | 11.6                                  | 9.5                         | 3                                 | 317                                 |
| 171    | 1995 | 3     | 14  | 13:45 | 1.0                             | -2.0        | -0.5        | 46.0                     | 5                       | 242.1                | 4.1                                   | 12.1                        | 3                                 | 320                                 |
| 172    | 1995 | 3     | 15  | 5:45  | 1.0                             | -4.0        | -1.5        | 22.0                     | 5                       | 115.8                | 8.6                                   | 5.8                         | 1                                 | 320                                 |
| 173    | 1995 | 3     | 18  | 5:45  | 3.0                             | -1.5        | 0.8         | 28.0                     | 8                       | 92.1                 | 10.9                                  | 7.4                         | 3                                 | 315                                 |
| 174    | 1995 | 3     | 21  | 5:45  | -2.0                            | -4.5        | -3.3        | 94.0                     | 38                      | 65.1                 | 15.4                                  | 24.7                        | 1                                 | 357                                 |
| 175    | 1995 | 3     | 21  | 13:45 | -3.0                            | -5.0        | -4.0        | 41.5                     | 14                      | 78.0                 | 12.8                                  | 10.9                        | 1                                 | 361                                 |
| 176    | 1995 | 3     | 22  | 5:45  | -3.0                            | -9.0        | -6.0        | 16.9                     | 8                       | 55.6                 | 18.0                                  | 4.4                         | 3                                 | 355                                 |
| 177    | 1995 | 4     | 4   | 6:15  | 9.5                             | -0.5        | 4.5         | 34.0                     | 8                       | 111.8                | 8.9                                   | 8.9                         | 1                                 | 311                                 |
| 178    | 1995 | 4     | 4   | 13:50 | 0.0                             | -2.5        | -1.3        | 27.0                     | 5                       | 142.1                | 7.0                                   | 7.1                         | 1                                 | 315                                 |
| 179    | 1995 | 4     | 8   | 5:45  | 0.0                             | -4.0        | -2.0        | 76.0                     | 23                      | 87.0                 | 11.5                                  | 20.0                        | 1                                 | 349                                 |
| 180    | 1995 | 4     | 11  | 5:45  | -1.5                            | -7.5        | -4.5        | 26.0                     | 8                       | 85.5                 | 11.7                                  | 6.8                         | 1                                 | 344                                 |
| 181    | 1995 | 4     | 13  | 6:00  | 1.0                             | -3.5        | -1.3        | 40.8                     | 12                      | 89.5                 | 11.2                                  | 10.7                        | 1                                 | 348                                 |
| 182    | 1995 | 12    | 10  | 5:50  | 1.5                             | -7.5        | -3.0        | 69.9                     | 12                      | 153.2                | 6.5                                   | 18.4                        | 2                                 | 86                                  |
| 183    | 1995 | 12    | 11  | 13:45 | 0.5                             | 0.0         | 0.3         | 35.8                     | 11                      | 85.5                 | 11.7                                  | 9.4                         | 2                                 | 109                                 |
| 184    | 1995 | 12    | 12  | 13:30 | -1.5                            | -2.5        | -2.0        | 46.5                     | 11                      | 111.2                | 9.0                                   | 12.2                        | 2                                 | 117                                 |
| 185    | 1995 | 12    | 13  | 5:50  | 1.0                             | -2.0        | -0.5        | 44.0                     | 10                      | 115.8                | 8.6                                   | 11.6                        | 1                                 | 122                                 |
| 186    | 1995 | 12    | 18  | 5:50  | 0.5                             | -0.5        | 0.0         | 67.3                     | 19                      | 93.2                 | 10.7                                  | 17.7                        | 3                                 | 158                                 |
| 187    | 1995 | 12    | 29  | 5:45  | -1.0                            | -3.0        | -2.0        | 23.0                     | 7                       | 86.5                 | 11.6                                  | 6.1                         | 3                                 | 138                                 |
| 188    | 1995 | 12    | 30  | 13:30 | -0.5                            | -4.0        | -2.3        | 17.1                     | 7                       | 64.3                 | 15.6                                  | 4.5                         | 3                                 | 142                                 |
| 189    | 1996 | 1     | 3   | 5:45  | 2.5                             | -4.5        | -1.0        | 40.0                     | 9                       | 117.0                | 8.6                                   | 10.5                        | 2                                 | 140                                 |
| 190    | 1996 | 1     | 6   | 13:20 | 2.0                             | 0.0         | 1.0         | 37.0                     | 6                       | 162.3                | 6.2                                   | 9.7                         | 2                                 | 150                                 |
| 191    | 1996 | 1     | 9   | 5:45  | -0.5                            | -2.5        | -1.5        | 40.5                     | 15                      | 71.1                 | 14.1                                  | 10.7                        | 3                                 | 168                                 |
| 192    | 1996 | 1     | 15  | 5:50  | 0.5                             | -2.0        | -0.8        | 121.0                    | 35                      | 91.0                 | 11.0                                  | 31.8                        | 3                                 | 213                                 |
| 193    | 1996 | 1     | 15  | 14:05 | -0.5                            | -2.0        | -1.3        | 48.5                     | 15                      | 85.1                 | 11.8                                  | 12.8                        | 3                                 | 220                                 |
| 194    | 1996 | 1     | 21  | 6:15  | -9.0                            | -13.5       | -11.3       | 19.6                     | 7                       | 73.7                 | 13.6                                  | 5.2                         | 2                                 | 202                                 |

| Sample | Year | Month | Day | Time  | Sample Interval<br>Temperatures |             |             | Snow<br>Sample<br>Weight | Snow<br>Sample<br>Depth | Snow<br>Density      | Snow<br>Depth<br>to<br>Water<br>Depth | Snow<br>Water<br>Equivalent | Air<br>Flow<br>Type               | Depth<br>of<br>Snow<br>on<br>Ground |
|--------|------|-------|-----|-------|---------------------------------|-------------|-------------|--------------------------|-------------------------|----------------------|---------------------------------------|-----------------------------|-----------------------------------|-------------------------------------|
|        |      |       |     |       | Max<br>(LST)                    | Min<br>(°C) | Avg<br>(°C) | (g)                      | (cm)                    | (kg/m <sup>3</sup> ) | Ratio                                 | (mm H <sub>2</sub> O)       | Inflow =1<br>Outflow=2<br>Other=3 | (cm)                                |
| 195    | 1996 | 2     | 6   | 5:55  | -1.5                            | -2.5        | -2.0        | 94.8                     | 20                      | 124.7                | 8.0                                   | 24.9                        | 1                                 | 215                                 |
| 196    | 1996 | 2     | 7   | 5:45  | 0.5                             | -3.0        | -1.3        | 39.0                     | 8                       | 128.3                | 7.8                                   | 10.3                        | 3                                 | 222                                 |
| 197    | 1996 | 2     | 8   | 10:30 | 1.0                             | -2.5        | -0.8        | 56.0                     | 14                      | 105.3                | 9.5                                   | 14.7                        | 3                                 | 230                                 |
| 198    | 1996 | 2     | 18  | 13:55 | 1.0                             | 0.0         | 0.5         | 67.0                     | 19                      | 92.8                 | 10.8                                  | 17.6                        | 3                                 | 225                                 |
| 199    | 1996 | 2     | 20  | 5:45  | -1.5                            | -4.0        | -2.8        | 17.2                     | 6                       | 75.4                 | 13.3                                  | 4.5                         | 1                                 | 222                                 |
| 200    | 1996 | 2     | 20  | 13:55 | -3.0                            | -4.0        | -3.5        | 44.5                     | 15                      | 78.1                 | 12.8                                  | 11.7                        | 1                                 | 233                                 |
| 201    | 1996 | 2     | 21  | 5:50  | -3.0                            | -7.5        | -5.3        | 86.0                     | 25                      | 90.5                 | 11.0                                  | 22.6                        | 1                                 | 251                                 |
| 202    | 1996 | 2     | 22  | 6:15  | -4.5                            | -10.0       | -7.3        | 18.0                     | 6                       | 78.9                 | 12.7                                  | 4.7                         | 1                                 | 249                                 |
| 203    | 1996 | 2     | 23  | 5:45  | -7.0                            | -11.0       | -9.0        | 45.0                     | 13                      | 91.1                 | 11.0                                  | 11.8                        | 1                                 | 253                                 |
| 204    | 1996 | 3     | 4   | 5:50  | -6.5                            | -15.5       | -11.0       | 87.0                     | 53                      | 43.2                 | 23.1                                  | 22.9                        | 2                                 | 278                                 |
| 205    | 1996 | 3     | 19  | 6:10  | 6.5                             | -3.0        | 1.8         | 32.5                     | 12                      | 71.3                 | 14.0                                  | 8.6                         | 1                                 | 220                                 |
| 206    | 1996 | 3     | 30  | 5:45  | -2.5                            | -9.0        | -5.8        | 14.0                     | 10                      | 36.8                 | 27.1                                  | 3.7                         | 3                                 | 223                                 |
| 207    | 1996 | 4     | 1   | 5:45  | -1.5                            | -4.5        | -3.0        | 50.5                     | 17                      | 78.2                 | 12.8                                  | 13.3                        | 1                                 | 236                                 |
| 208    | 1996 | 4     | 1   | 14:00 | 0.0                             | -4.5        | -2.3        | 27.4                     | 20                      | 36.0                 | 27.8                                  | 7.2                         | 1                                 | 253                                 |
| 209    | 1996 | 4     | 2   | 5:55  | 0.5                             | -8.0        | -3.8        | 33.0                     | 10                      | 86.8                 | 11.5                                  | 8.7                         | 1                                 | 254                                 |
| 210    | 1996 | 4     | 18  | 6:15  | 1.0                             | -4.0        | -1.5        | 18.0                     | 8                       | 59.2                 | 16.9                                  | 4.7                         | 1                                 | 218                                 |
| 211    | 1996 | 4     | 26  | 5:50  | -1.5                            | -4.5        | -3.0        | 42.0                     | 14                      | 78.9                 | 12.7                                  | 11.1                        | 1                                 | 229                                 |
| 212    | 1996 | 11    | 28  | 6:15  | 0.0                             | -4.5        | -2.3        | 90.5                     | 17                      | 140.1                | 7.1                                   | 23.8                        | 3                                 | 106                                 |
| 213    | 1996 | 12    | 1   | 5:45  | -0.5                            | -4.0        | -2.3        | 53.0                     | 14                      | 99.6                 | 10.0                                  | 13.9                        | 1                                 | 115                                 |
| 214    | 1996 | 12    | 4   | 13:56 | -2.5                            | -5.0        | -3.8        | 74.2                     | 20                      | 97.6                 | 10.2                                  | 19.5                        | 3                                 | 138                                 |
| 215    | 1996 | 12    | 5   | 5:50  | -2.0                            | -5.5        | -3.8        | 19.8                     | 5                       | 103.9                | 9.6                                   | 5.2                         | 1                                 | 138                                 |
| 216    | 1996 | 12    | 6   | 5:50  | -5.0                            | -6.5        | -5.8        | 15.5                     | 5                       | 81.6                 | 12.3                                  | 4.1                         | 1                                 | 138                                 |
| 217    | 1996 | 12    | 8   | 5:45  | -4.0                            | -6.0        | -5.0        | 21.0                     | 8                       | 69.1                 | 14.5                                  | 5.5                         | 3                                 | 159                                 |
| 218    | 1996 | 12    | 8   | 13:50 | -4.0                            | -6.0        | -5.0        | 43.0                     | 18                      | 62.9                 | 15.9                                  | 11.3                        | 3                                 | 174                                 |
| 219    | 1996 | 12    | 10  | 5:50  | -2.0                            | -6.0        | -4.0        | 31.0                     | 10                      | 81.6                 | 12.3                                  | 8.2                         | 3                                 | 171                                 |
| 220    | 1996 | 12    | 11  | 6:00  | -6.5                            | -8.5        | -7.5        | 51.5                     | 15                      | 90.4                 | 11.1                                  | 13.6                        | 3                                 | 185                                 |
| 221    | 1996 | 12    | 19  | 13:40 | -2.5                            | -5.5        | -4.0        | 53.0                     | 10                      | 146.8                | 6.8                                   | 13.9                        | 2                                 | 160                                 |
| 222    | 1996 | 12    | 20  | 5:50  | -3.5                            | -6.0        | -4.8        | 22.7                     | 6                       | 99.6                 | 10.0                                  | 6.0                         | 2                                 | 163                                 |
| 223    | 1996 | 12    | 29  | 6:15  | -18.0                           | -25.5       | -21.8       | 11.5                     | 8                       | 37.8                 | 26.4                                  | 3.0                         | 2                                 | 163                                 |
| 224    | 1996 | 12    | 29  | 13:35 | -16.0                           | -23.0       | -19.5       | 71.4                     | 17                      | 110.5                | 9.0                                   | 18.8                        | 2                                 | 179                                 |
| 225    | 1996 | 12    | 30  | 5:45  | 0.0                             | -16.0       | -8.0        | 25.5                     | 7                       | 95.9                 | 10.4                                  | 6.7                         | 2                                 | 183                                 |
| 226    | 1996 | 12    | 30  | 14:00 | 0.0                             | -4.0        | -2.0        | 23.6                     | 23                      | 27.0                 | 37.0                                  | 6.2                         | 2                                 | 197                                 |
| 227    | 1996 | 12    | 31  | 5:45  | 0.0                             | -2.5        | -1.3        | 43.0                     | 12                      | 94.3                 | 10.6                                  | 11.3                        | 2                                 | 205                                 |
| 228    | 1997 | 1     | 1   | 5:50  | 1.0                             | -2.0        | -0.5        | 149.0                    | 29                      | 135.2                | 7.4                                   | 39.2                        | 3                                 | 227                                 |
| 229    | 1997 | 1     | 1   | 13:50 | -0.5                            | -2.0        | -1.3        | 24.0                     | 5                       | 126.3                | 7.9                                   | 6.3                         | 3                                 | 227                                 |
| 230    | 1997 | 1     | 3   | 5:45  | -2.0                            | -6.0        | -4.0        | 27.2                     | 9                       | 79.5                 | 12.6                                  | 7.2                         | 1                                 | 234                                 |
| 231    | 1997 | 1     | 17  | 5:45  | 0.5                             | -3.5        | -1.5        | 92.5                     | 25                      | 97.4                 | 10.3                                  | 24.3                        | 2                                 | 223                                 |
| 232    | 1997 | 1     | 23  | 6:10  | -4.5                            | -7.5        | -6.0        | 14.2                     | 7                       | 53.4                 | 18.7                                  | 3.7                         | 1                                 | 240                                 |
| 233    | 1997 | 1     | 23  | 13:45 | -4.5                            | -8.0        | -6.3        | 25.3                     | 11                      | 60.5                 | 16.5                                  | 6.7                         | 1                                 | 247                                 |
| 234    | 1997 | 2     | 12  | 5:55  | -2.5                            | -5.0        | -3.8        | 29.3                     | 13                      | 59.3                 | 16.9                                  | 7.7                         | 3                                 | 253                                 |

| Sample | Year | Month | Day | Time  | Sample Interval<br>Temperatures |             |             | Snow<br>Sample<br>Weight | Snow<br>Sample<br>Depth | Snow<br>Density      | Snow<br>Depth<br>to<br>Water<br>Depth | Snow<br>Water<br>Equivalent | Air<br>Flow<br>Type<br>Inflow =1<br>Outflow=2<br>Other=3 | Depth<br>of<br>Snow<br>on<br>Ground<br>(cm) |
|--------|------|-------|-----|-------|---------------------------------|-------------|-------------|--------------------------|-------------------------|----------------------|---------------------------------------|-----------------------------|----------------------------------------------------------|---------------------------------------------|
|        |      |       |     |       | Max<br>(LST)                    | Min<br>(°C) | Avg<br>(°C) | (g)                      | (cm)                    | (kg/m <sup>3</sup> ) | Ratio                                 | (mm H <sub>2</sub> O)       |                                                          |                                             |
| 235    | 1997 | 2     | 17  | 5:20  | 5.0                             | -2.0        | 1.5         | 30.0                     | 10                      | 78.9                 | 12.7                                  | 7.9                         | 1                                                        | 254                                         |
| 236    | 1997 | 2     | 19  | 5:42  | -3.0                            | -4.5        | -3.8        | 43.6                     | 13                      | 88.3                 | 11.3                                  | 11.5                        | 1                                                        | 261                                         |
| 237    | 1997 | 3     | 1   | 5:45  | -5.0                            | -7.0        | -6.0        | 24.5                     | 7                       | 92.1                 | 10.9                                  | 6.4                         | 3                                                        | 249                                         |
| 238    | 1997 | 3     | 1   | 13:35 | -4.0                            | -5.5        | -4.8        | 36.5                     | 12                      | 80.0                 | 12.5                                  | 9.6                         | 3                                                        | 261                                         |
| 239    | 1997 | 3     | 2   | 5:40  | -3.5                            | -5.0        | -4.3        | 47.0                     | 17                      | 72.8                 | 13.7                                  | 12.4                        | 1                                                        | 273                                         |
| 240    | 1997 | 3     | 6   | 5:50  | -3.5                            | -6.0        | -4.8        | 38.2                     | 15                      | 67.0                 | 14.9                                  | 10.1                        | 3                                                        | 276                                         |
| 241    | 1997 | 3     | 7   | 5:50  | -1.5                            | -5.0        | -3.3        | 49.5                     | 15                      | 86.8                 | 11.5                                  | 13.0                        | 1                                                        | 278                                         |
| 242    | 1997 | 3     | 9   | 5:40  | -2.0                            | -4.0        | -3.0        | 22.0                     | 6                       | 96.5                 | 10.4                                  | 5.8                         | 1                                                        | 280                                         |
| 243    | 1997 | 3     | 12  | 5:45  | -5.0                            | -12.0       | -8.5        | 15.0                     | 8                       | 49.3                 | 20.3                                  | 3.9                         | 3                                                        | 283                                         |
| 244    | 1997 | 3     | 15  | 13:35 | -9.0                            | -10.5       | -9.8        | 25.2                     | 8                       | 82.9                 | 12.1                                  | 6.6                         | 2                                                        | 275                                         |
| 245    | 1997 | 3     | 16  | 5:40  | -6.5                            | -9.5        | -8.0        | 44.5                     | 15                      | 78.1                 | 12.8                                  | 11.7                        | 3                                                        | 293                                         |
| 246    | 1997 | 3     | 18  | 13:45 | 1.5                             | -1.0        | 0.3         | 145.0                    | 14                      | 272.6                | 3.7                                   | 38.2                        | 3                                                        | 356                                         |
| 247    | 1997 | 3     | 27  | 6:00  | -1.0                            | -8.5        | -4.8        | 33.8                     | 11                      | 80.9                 | 12.4                                  | 8.9                         | 1                                                        | 314                                         |
| 248    | 1997 | 3     | 31  | 5:40  | 4.0                             | -5.0        | -0.5        | 67.0                     | 23                      | 76.7                 | 13.0                                  | 17.6                        | 1                                                        | 340                                         |
| 249    | 1997 | 4     | 13  | 6:10  | 4.0                             | -3.0        | 0.5         | 36.0                     | 12                      | 78.9                 | 12.7                                  | 9.5                         | 1                                                        | 313                                         |
| 250    | 1997 | 4     | 20  | 5:50  | 2.0                             | -0.5        | 0.8         | 84.0                     | 15                      | 147.4                | 6.8                                   | 22.1                        | 1                                                        | 323                                         |
| 251    | 1997 | 11    | 27  | 8:20  | 0.0                             | -2.0        | -1.0        | 31.0                     | 10                      | 81.6                 | 12.3                                  | 8.2                         | 1                                                        | 69                                          |
| 252    | 1997 | 11    | 27  | 14:00 | -2.0                            | -3.5        | -2.8        | 47.0                     | 16                      | 77.3                 | 12.9                                  | 12.4                        | 1                                                        | 85                                          |
| 253    | 1997 | 11    | 28  | 6:45  | 0.5                             | -1.0        | -0.3        | 148.0                    | 39                      | 99.9                 | 10.0                                  | 38.9                        | 3                                                        | 122                                         |
| 254    | 1997 | 11    | 29  | 6:15  | -1.5                            | -7.0        | -4.3        | 42.4                     | 12                      | 93.0                 | 10.8                                  | 11.2                        | 3                                                        | 128                                         |
| 255    | 1997 | 11    | 29  | 13:55 | -0.5                            | -2.0        | -1.3        | 70.0                     | 22                      | 83.7                 | 11.9                                  | 18.4                        | 3                                                        | 147                                         |
| 256    | 1997 | 11    | 30  | 5:55  | -0.5                            | -4.5        | -2.5        | 47.5                     | 15                      | 83.3                 | 12.0                                  | 12.5                        | 3                                                        | 150                                         |
| 257    | 1997 | 12    | 14  | 14:00 | 0.0                             | -3.0        | -1.5        | 56.0                     | 17                      | 86.7                 | 11.5                                  | 14.7                        | 3                                                        | 129                                         |
| 258    | 1997 | 12    | 15  | 13:37 | 1.5                             | -4.5        | -1.5        | 30.5                     | 11                      | 73.0                 | 13.7                                  | 8.0                         | 1                                                        | 138                                         |
| 259    | 1997 | 12    | 16  | 6:00  | -1.0                            | -4.5        | -2.8        | 71.5                     | 21                      | 89.6                 | 11.2                                  | 18.8                        | 3                                                        | 153                                         |
| 260    | 1997 | 12    | 16  | 13:45 | 1.0                             | -1.0        | 0.0         | 59.0                     | 10                      | 155.3                | 6.4                                   | 15.5                        | 3                                                        | 158                                         |
| 261    | 1997 | 12    | 19  | 6:15  | -4.0                            | -8.5        | -6.3        | 11.5                     | 5                       | 60.5                 | 16.5                                  | 3.0                         | 3                                                        | 157                                         |
| 262    | 1997 | 12    | 19  | 13:45 | -3.5                            | -4.5        | -4.0        | 27.0                     | 8                       | 88.8                 | 11.3                                  | 7.1                         | 3                                                        | 165                                         |
| 263    | 1997 | 12    | 20  | 5:45  | -2.5                            | -5.0        | -3.8        | 54.5                     | 15                      | 95.6                 | 10.5                                  | 14.3                        | 1                                                        | 173                                         |
| 264    | 1997 | 12    | 20  | 13:40 | -4.0                            | -4.5        | -4.3        | 13.0                     | 7                       | 48.9                 | 20.5                                  | 3.4                         | 1                                                        | 178                                         |
| 265    | 1997 | 12    | 23  | 5:45  | -3.5                            | -7.5        | -5.5        | 29.0                     | 5                       | 152.6                | 6.6                                   | 7.6                         | 1                                                        | 167                                         |
| 266    | 1997 | 12    | 26  | 13:35 | 0.0                             | -4.0        | -2.0        | 27.5                     | 7                       | 103.4                | 9.7                                   | 7.2                         | 3                                                        | 164                                         |
| 267    | 1998 | 1     | 1   | 5:30  | 0.0                             | -2.0        | -1.0        | 43.0                     | 13                      | 87.0                 | 11.5                                  | 11.3                        | 3                                                        | 160                                         |
| 268    | 1998 | 1     | 1   | 13:44 | -1.5                            | -5.5        | -3.5        | 19.0                     | 7                       | 71.4                 | 14.0                                  | 5.0                         | 3                                                        | 164                                         |
| 269    | 1998 | 1     | 2   | 5:45  | -5.5                            | -16.0       | -10.8       | 50.0                     | 14                      | 94.0                 | 10.6                                  | 13.2                        | 2                                                        | 174                                         |
| 270    | 1998 | 1     | 5   | 5:50  | -5.5                            | -8.0        | -6.8        | 37.0                     | 14                      | 69.5                 | 14.4                                  | 9.7                         | 2                                                        | 182                                         |
| 271    | 1998 | 1     | 5   | 14:45 | -5.5                            | -6.5        | -6.0        | 27.8                     | 14                      | 52.3                 | 19.1                                  | 7.3                         | 2                                                        | 193                                         |
| 272    | 1998 | 1     | 6   | 5:55  | -6.0                            | -7.0        | -6.5        | 18.0                     | 6                       | 78.9                 | 12.7                                  | 4.7                         | 3                                                        | 194                                         |
| 273    | 1998 | 1     | 13  | 13:45 | -2.0                            | -8.0        | -5.0        | 18.0                     | 6                       | 78.9                 | 12.7                                  | 4.7                         | 2                                                        | 178                                         |
| 274    | 1998 | 1     | 14  | 5:45  | -2.0                            | -3.0        | -2.5        | 87.0                     | 27                      | 84.8                 | 11.8                                  | 22.9                        | 2                                                        | 205                                         |

| Sample | Year | Month | Day | Time  | Sample Interval<br>Temperatures |             |             | Snow<br>Sample<br>Weight | Snow<br>Sample<br>Depth | Snow<br>Density      | Snow<br>Depth<br>to<br>Water<br>Depth | Snow<br>Water<br>Equivalent | Air<br>Flow<br>Type<br>Inflow =1<br>Outflow=2<br>Other=3 | Depth<br>of<br>Snow<br>on<br>Ground |
|--------|------|-------|-----|-------|---------------------------------|-------------|-------------|--------------------------|-------------------------|----------------------|---------------------------------------|-----------------------------|----------------------------------------------------------|-------------------------------------|
|        |      |       |     |       | Max<br>(LST)                    | Min<br>(°C) | Avg<br>(°C) | (g)                      | (cm)                    | (kg/m <sup>3</sup> ) | Ratio                                 | (mm H <sub>2</sub> O)       |                                                          | (cm)                                |
| 275    | 1998 | 1     | 17  | 6:15  | -2.0                            | -4.0        | -3.0        | 30.2                     | 10                      | 79.5                 | 12.6                                  | 7.9                         | 3                                                        | 228                                 |
| 276    | 1998 | 1     | 19  | 5:50  | 0.0                             | -2.0        | -1.0        | 32.4                     | 9                       | 94.7                 | 10.6                                  | 8.5                         | 3                                                        | 223                                 |
| 277    | 1998 | 1     | 22  | 5:45  | -3.0                            | -4.0        | -3.5        | 22.0                     | 9                       | 64.3                 | 15.5                                  | 5.8                         | 3                                                        | 225                                 |
| 278    | 1998 | 1     | 23  | 5:45  | 0.0                             | -4.0        | -2.0        | 44.0                     | 14                      | 82.7                 | 12.1                                  | 11.6                        | 3                                                        | 230                                 |
| 279    | 1998 | 1     | 23  | 13:45 | 0.0                             | -0.5        | -0.3        | 55.0                     | 24                      | 60.3                 | 16.6                                  | 14.5                        | 3                                                        | 250                                 |
| 280    | 1998 | 1     | 24  | 5:40  | 0.0                             | -2.5        | -1.3        | 123.0                    | 37                      | 87.5                 | 11.4                                  | 32.4                        | 1                                                        | 272                                 |
| 281    | 1998 | 1     | 25  | 5:55  | -1.0                            | -3.0        | -2.0        | 22.8                     | 7                       | 85.7                 | 11.7                                  | 6.0                         | 3                                                        | 267                                 |
| 282    | 1998 | 1     | 26  | 5:50  | -0.5                            | -2.0        | -1.3        | 65.3                     | 15                      | 114.5                | 8.7                                   | 17.2                        | 1                                                        | 272                                 |
| 283    | 1998 | 1     | 26  | 13:40 | -1.5                            | -3.0        | -2.3        | 32.5                     | 10                      | 85.5                 | 11.7                                  | 8.6                         | 1                                                        | 279                                 |
| 284    | 1998 | 2     | 5   | 6:20  | 1.5                             | -1.0        | 0.3         | 19.5                     | 8                       | 64.1                 | 15.6                                  | 5.1                         | 3                                                        | 256                                 |
| 285    | 1998 | 2     | 7   | 6:00  | 2.0                             | -1.5        | 0.3         | 23.8                     | 6                       | 104.2                | 9.6                                   | 6.3                         | 2                                                        | 256                                 |
| 286    | 1998 | 2     | 9   | 5:45  | 1.5                             | -3.5        | -1.0        | 20.0                     | 7                       | 75.2                 | 13.3                                  | 5.3                         | 1                                                        | 256                                 |
| 287    | 1998 | 2     | 10  | 13:35 | -2.5                            | -5.0        | -3.8        | 30.3                     | 7                       | 113.9                | 8.8                                   | 8.0                         | 3                                                        | 256                                 |
| 288    | 1998 | 2     | 12  | 5:45  | -2.0                            | -3.5        | -2.8        | 36.0                     | 13                      | 72.9                 | 13.7                                  | 9.5                         | 3                                                        | 268                                 |
| 289    | 1998 | 2     | 13  | 5:45  | 0.5                             | -1.5        | -0.5        | 39.0                     | 20                      | 51.3                 | 19.5                                  | 10.3                        | 3                                                        | 299                                 |
| 290    | 1998 | 2     | 18  | 5:50  | -1.5                            | -3.5        | -2.5        | 27.0                     | 14                      | 50.8                 | 19.7                                  | 7.1                         | 3                                                        | 285                                 |
| 291    | 1998 | 2     | 19  | 5:45  | -0.5                            | -3.0        | -1.8        | 132.0                    | 34                      | 102.2                | 9.8                                   | 34.7                        | 3                                                        | 307                                 |
| 292    | 1998 | 2     | 20  | 5:50  | -0.5                            | -2.5        | -1.5        | 23.5                     | 9                       | 68.7                 | 14.6                                  | 6.2                         | 3                                                        | 302                                 |
| 293    | 1998 | 2     | 21  | 5:45  | -2.0                            | -4.5        | -3.3        | 71.0                     | 24                      | 77.9                 | 12.8                                  | 18.7                        | 1                                                        | 325                                 |
| 294    | 1998 | 2     | 21  | 13:40 | -2.5                            | -4.0        | -3.3        | 27.0                     | 8                       | 88.8                 | 11.3                                  | 7.1                         | 1                                                        | 329                                 |
| 295    | 1998 | 2     | 22  | 6:00  | -2.5                            | -5.0        | -3.8        | 36.1                     | 10                      | 95.0                 | 10.5                                  | 9.5                         | 1                                                        | 327                                 |
| 296    | 1998 | 2     | 22  | 14:00 | -3.0                            | -5.5        | -4.3        | 39.1                     | 7                       | 147.0                | 6.8                                   | 10.3                        | 1                                                        | 329                                 |
| 297    | 1998 | 2     | 25  | 13:30 | -4.0                            | -6.5        | -5.3        | 28.0                     | 8                       | 92.1                 | 10.9                                  | 7.4                         | 3                                                        | 318                                 |
| 298    | 1998 | 3     | 9   | 6:00  | -2.0                            | -4.5        | -3.3        | 17.0                     | 6                       | 74.3                 | 13.5                                  | 4.5                         | 1                                                        | 295                                 |
| 299    | 1998 | 3     | 11  | 5:45  | 1.0                             | -2.5        | -0.8        | 23.5                     | 6                       | 103.1                | 9.7                                   | 6.2                         | 3                                                        | 296                                 |
| 300    | 1998 | 3     | 23  | 13:35 | -0.5                            | -3.0        | -1.8        | 26.4                     | 6                       | 115.8                | 8.6                                   | 6.9                         | 3                                                        | 269                                 |
| 301    | 1998 | 3     | 24  | 5:50  | 1.0                             | -2.0        | -0.5        | 59.7                     | 17                      | 92.4                 | 10.8                                  | 15.7                        | 1                                                        | 285                                 |
| 302    | 1998 | 3     | 27  | 13:45 | -5.5                            | -8.5        | -7.0        | 12.0                     | 5                       | 63.2                 | 15.8                                  | 3.2                         | 1                                                        | 285                                 |
| 303    | 1998 | 3     | 28  | 6:10  | -5.5                            | -11.0       | -8.3        | 31.5                     | 5                       | 165.8                | 6.0                                   | 8.3                         | 3                                                        | 288                                 |
| 304    | 1998 | 4     | 7   | 13:50 | -1.0                            | -4.0        | -2.5        | 25.1                     | 5                       | 132.1                | 7.6                                   | 6.6                         | 1                                                        | 278                                 |
| 305    | 1998 | 4     | 11  | 6:05  | -1.0                            | -4.5        | -2.8        | 27.4                     | 7                       | 103.0                | 9.7                                   | 7.2                         | 1                                                        | 288                                 |
| 306    | 1998 | 4     | 11  | 13:50 | -1.5                            | -5.0        | -3.3        | 19.8                     | 9                       | 58.0                 | 17.2                                  | 5.2                         | 1                                                        | 295                                 |
| 307    | 1998 | 4     | 13  | 6:20  | -3.0                            | -9.5        | -6.3        | 18.6                     | 8                       | 61.2                 | 16.3                                  | 4.9                         | 3                                                        | 300                                 |
| 308    | 1998 | 11    | 24  | 7:45  | -2.0                            | -5.0        | -3.5        | 135.0                    | 32                      | 111.0                | 9.0                                   | 35.5                        | 1                                                        | 138                                 |
| 309    | 1998 | 11    | 25  | 6:10  | -1.5                            | -4.5        | -3.0        | 119.0                    | 28                      | 111.8                | 8.9                                   | 31.3                        | 1                                                        | 152                                 |
| 310    | 1998 | 11    | 27  | 13:25 | -2.0                            | -4.0        | -3.0        | 31.5                     | 15                      | 55.3                 | 18.1                                  | 8.3                         | 3                                                        | 173                                 |
| 311    | 1998 | 11    | 30  | 6:10  | -4.0                            | -2.0        | -3.0        | 30.0                     | 10                      | 78.9                 | 12.7                                  | 7.9                         | 3                                                        | 165                                 |
| 312    | 1998 | 12    | 2   | 6:10  | -3.0                            | -6.5        | -4.8        | 53.2                     | 14                      | 100.0                | 10.0                                  | 14.0                        | 1                                                        | 175                                 |
| 313    | 1998 | 12    | 6   | 5:50  | -5.5                            | -9.0        | -7.3        | 13.0                     | 7                       | 48.9                 | 20.5                                  | 3.4                         | 1                                                        | 166                                 |
| 314    | 1998 | 12    | 7   | 6:30  | -4.0                            | -8.0        | -6.0        | 36.0                     | 11                      | 86.1                 | 11.6                                  | 9.5                         | 1                                                        | 168                                 |

| Sample | Year | Month | Day | Time  | Sample Interval<br>Temperatures |             |             | Snow<br>Sample<br>Weight | Snow<br>Sample<br>Depth | Snow<br>Density      | Snow<br>Depth<br>to<br>Water<br>Depth | Snow<br>Water<br>Equivalent | Air<br>Flow<br>Type               | Depth<br>of<br>Snow<br>on<br>Ground |
|--------|------|-------|-----|-------|---------------------------------|-------------|-------------|--------------------------|-------------------------|----------------------|---------------------------------------|-----------------------------|-----------------------------------|-------------------------------------|
|        |      |       |     |       | Max<br>(LST)                    | Min<br>(°C) | Avg<br>(°C) | (g)                      | (cm)                    | (kg/m <sup>3</sup> ) | Ratio                                 | (mm H <sub>2</sub> O)       | Inflow =1<br>Outflow=2<br>Other=3 | (cm)                                |
| 315    | 1998 | 12    | 7   | 13:35 | -4.5                            | -7.0        | -5.8        | 47.0                     | 20                      | 61.8                 | 16.2                                  | 12.4                        | 1                                 | 183                                 |
| 316    | 1998 | 12    | 10  | 6:05  | 1.0                             | -4.0        | -1.5        | 51.2                     | 12                      | 112.3                | 8.9                                   | 13.5                        | 1                                 | 177                                 |
| 317    | 1998 | 12    | 10  | 13:55 | -1.0                            | -3.0        | -2.0        | 22.0                     | 8                       | 72.4                 | 13.8                                  | 5.8                         | 1                                 | 180                                 |
| 318    | 1998 | 12    | 12  | 5:50  | 0.0                             | -3.0        | -1.5        | 52.0                     | 17                      | 80.5                 | 12.4                                  | 13.7                        | 3                                 | 191                                 |
| 319    | 1998 | 12    | 13  | 5:45  | 2.5                             | 0.0         | 1.3         | 110.0                    | 13                      | 222.7                | 4.5                                   | 28.9                        | 1                                 | 200                                 |
| 320    | 1998 | 12    | 13  | 14:00 | 1.0                             | -0.5        | 0.3         | 37.1                     | 12                      | 81.4                 | 12.3                                  | 9.8                         | 1                                 | 206                                 |
| 321    | 1998 | 12    | 24  | 6:30  | -7.5                            | -12.0       | -9.8        | 29.1                     | 9                       | 85.1                 | 11.8                                  | 7.7                         | 3                                 | 186                                 |
| 322    | 1998 | 12    | 26  | 6:20  | -4.0                            | -6.5        | -5.3        | 35.5                     | 9                       | 103.8                | 9.6                                   | 9.3                         | 1                                 | 195                                 |
| 323    | 1998 | 12    | 27  | 6:20  | -4.0                            | -6.0        | -5.0        | 18.0                     | 7                       | 67.7                 | 14.8                                  | 4.7                         | 2                                 | 200                                 |
| 324    | 1998 | 12    | 27  | 13:30 | -3.5                            | -5.0        | -4.3        | 34.0                     | 13                      | 68.8                 | 14.5                                  | 8.9                         | 2                                 | 211                                 |
| 325    | 1998 | 12    | 28  | 5:45  | -0.5                            | -5.0        | -2.8        | 41.0                     | 12                      | 89.9                 | 11.1                                  | 10.8                        | 2                                 | 220                                 |
| 326    | 1998 | 12    | 29  | 13:35 | 2.0                             | -1.0        | 0.5         | 57.0                     | 16                      | 93.8                 | 10.7                                  | 15.0                        | 3                                 | 229                                 |
| 327    | 1999 | 1     | 11  | 5:45  | 2.0                             | -1.5        | 0.3         | 78.0                     | 14                      | 146.6                | 6.8                                   | 20.5                        | 3                                 | 226                                 |
| 328    | 1999 | 1     | 14  | 13:45 | 0.5                             | -2.0        | -0.8        | 69.6                     | 20                      | 91.6                 | 10.9                                  | 18.3                        | 1                                 | 261                                 |
| 329    | 1999 | 1     | 18  | 5:45  | -3.0                            | -7.0        | -5.0        | 59.0                     | 20                      | 77.6                 | 12.9                                  | 15.5                        | 3                                 | 274                                 |
| 330    | 1999 | 1     | 19  | 5:45  | -2.0                            | -3.5        | -2.8        | 25.0                     | 16                      | 41.1                 | 24.3                                  | 6.6                         | 3                                 | 284                                 |
| 331    | 1999 | 1     | 22  | 6:20  | -1.5                            | -5.5        | -3.5        | 13.9                     | 5                       | 72.9                 | 13.7                                  | 3.6                         | 3                                 | 273                                 |
| 332    | 1999 | 1     | 27  | 13:47 | -6.0                            | -6.5        | -6.3        | 34.9                     | 9                       | 102.0                | 9.8                                   | 9.2                         | 1                                 | 267                                 |
| 333    | 1999 | 1     | 29  | 14:30 | -1.0                            | -4.0        | -2.5        | 106.0                    | 28                      | 99.6                 | 10.0                                  | 27.9                        | 1                                 | 350                                 |
| 334    | 1999 | 1     | 30  | 5:45  | -3.5                            | -11.0       | -7.3        | 40.0                     | 14                      | 75.2                 | 13.3                                  | 10.5                        | 3                                 | 349                                 |
| 335    | 1999 | 1     | 31  | 13:50 | -6.0                            | -8.0        | -7.0        | 32.6                     | 11                      | 78.0                 | 12.8                                  | 8.6                         | 1                                 | 342                                 |
| 336    | 1999 | 2     | 2   | 5:10  | -3.0                            | -6.5        | -4.8        | 65.5                     | 14                      | 123.1                | 8.1                                   | 17.2                        | 1                                 | 336                                 |
| 337    | 1999 | 2     | 4   | 5:50  | -5.0                            | -7.0        | -6.0        | 48.1                     | 16                      | 79.1                 | 12.6                                  | 12.7                        | 1                                 | 337                                 |
| 338    | 1999 | 2     | 6   | 5:50  | -4.0                            | -6.5        | -5.3        | 74.0                     | 23                      | 84.7                 | 11.8                                  | 19.5                        | 1                                 | 356                                 |
| 339    | 1999 | 2     | 7   | 5:45  | -3.0                            | -6.5        | -4.8        | 71.0                     | 22                      | 84.9                 | 11.8                                  | 18.7                        | 1                                 | 365                                 |
| 340    | 1999 | 2     | 8   | 6:00  | -4.0                            | -9.0        | -6.5        | 27.0                     | 8                       | 88.8                 | 11.3                                  | 7.1                         | 1                                 | 361                                 |
| 341    | 1999 | 2     | 8   | 13:55 | -6.5                            | -8.0        | -7.3        | 26.9                     | 10                      | 70.8                 | 14.1                                  | 7.1                         | 1                                 | 367                                 |
| 342    | 1999 | 2     | 9   | 5:45  | -7.5                            | -13.0       | -10.3       | 55.0                     | 17                      | 85.1                 | 11.7                                  | 14.5                        | 3                                 | 374                                 |
| 343    | 1999 | 2     | 13  | 13:40 | -3.0                            | -4.0        | -3.5        | 20.2                     | 8                       | 66.4                 | 15.0                                  | 5.3                         | 1                                 | 378                                 |
| 344    | 1999 | 2     | 16  | 5:45  | -2.5                            | -6.0        | -4.3        | 124.0                    | 20                      | 163.2                | 6.1                                   | 32.6                        | 3                                 | 377                                 |
| 345    | 1999 | 2     | 16  | 13:40 | -2.5                            | -4.0        | -3.3        | 16.0                     | 7                       | 60.2                 | 16.6                                  | 4.2                         | 3                                 | 378                                 |
| 346    | 1999 | 2     | 18  | 6:20  | -2.0                            | -10.5       | -6.3        | 11.5                     | 5                       | 60.5                 | 16.5                                  | 3.0                         | 3                                 | 380                                 |
| 347    | 1999 | 2     | 21  | 6:10  | -2.5                            | -5.0        | -3.8        | 19.0                     | 7                       | 71.4                 | 14.0                                  | 5.0                         | 1                                 | 372                                 |
| 348    | 1999 | 2     | 22  | 5:45  | -4.0                            | -5.5        | -4.8        | 21.5                     | 7                       | 80.8                 | 12.4                                  | 5.7                         | 1                                 | 374                                 |
| 349    | 1999 | 2     | 22  | 13:10 | -3.0                            | -5.0        | -4.0        | 50.9                     | 9                       | 148.8                | 6.7                                   | 13.4                        | 1                                 | 383                                 |
| 350    | 1999 | 2     | 24  | 14:00 | 0.0                             | -2.0        | -1.0        | 76.1                     | 10                      | 200.3                | 5.0                                   | 20.0                        | 3                                 | 414                                 |
| 351    | 1999 | 2     | 25  | 5:55  | -0.5                            | -4.0        | -2.3        | 72.1                     | 28                      | 67.7                 | 14.8                                  | 19.0                        | 1                                 | 430                                 |
| 352    | 1999 | 2     | 25  | 13:40 | -2.0                            | -4.5        | -3.3        | 31.5                     | 12                      | 69.1                 | 14.5                                  | 8.3                         | 1                                 | 435                                 |
| 353    | 1999 | 2     | 26  | 5:50  | -2.0                            | -9.0        | -5.5        | 15.5                     | 6                       | 68.0                 | 14.7                                  | 4.1                         | 1                                 | 426                                 |
| 354    | 1999 | 2     | 27  | 5:45  | -4.0                            | -9.0        | -6.5        | 37.0                     | 10                      | 97.4                 | 10.3                                  | 9.7                         | 3                                 | 422                                 |

| Sample | Year | Month | Day | Time  | Sample Interval<br>Temperatures |             |             | Snow<br>Sample<br>Weight | Snow<br>Sample<br>Depth | Snow<br>Density      | Snow<br>Depth<br>to<br>Water<br>Depth | Snow<br>Water<br>Equivalent | Air<br>Flow<br>Type<br>Inflow =1<br>Outflow=2<br>Other=3 | Depth<br>of<br>Snow<br>on<br>Ground<br>(cm) |
|--------|------|-------|-----|-------|---------------------------------|-------------|-------------|--------------------------|-------------------------|----------------------|---------------------------------------|-----------------------------|----------------------------------------------------------|---------------------------------------------|
|        |      |       |     |       | Max<br>(LST)                    | Min<br>(°C) | Avg<br>(°C) | (g)                      | (cm)                    | (kg/m <sup>3</sup> ) | Ratio                                 | (mm H <sub>2</sub> O)       |                                                          |                                             |
| 355    | 1999 | 2     | 27  | 13:30 | -1.5                            | -5.5        | -3.5        | 41.0                     | 12                      | 89.9                 | 11.1                                  | 10.8                        | 3                                                        | 430                                         |
| 356    | 1999 | 2     | 28  | 5:50  | 0.0                             | -2.5        | -1.3        | 22.3                     | 22                      | 26.7                 | 37.5                                  | 5.9                         | 3                                                        | 439                                         |
| 357    | 1999 | 3     | 1   | 5:50  | -1.5                            | -7.0        | -4.3        | 30.0                     | 10                      | 78.9                 | 12.7                                  | 7.9                         | 1                                                        | 439                                         |
| 358    | 1999 | 3     | 3   | 5:40  | -4.5                            | -8.0        | -6.3        | 27.0                     | 27                      | 26.3                 | 38.0                                  | 7.1                         | 3                                                        | 448                                         |
| 359    | 1999 | 3     | 3   | 13:45 | -4.0                            | -6.5        | -5.3        | 54.5                     | 17                      | 84.4                 | 11.9                                  | 14.3                        | 3                                                        | 459                                         |
| 360    | 1999 | 3     | 9   | 5:45  | -3.5                            | -6.0        | -4.8        | 30.0                     | 15                      | 52.6                 | 19.0                                  | 7.9                         | 1                                                        | 434                                         |
| 361    | 1999 | 3     | 12  | 6:20  | -2.0                            | -5.0        | -3.5        | 14.2                     | 7                       | 53.4                 | 18.7                                  | 3.7                         | 1                                                        | 420                                         |
| 362    | 1999 | 3     | 13  | 5:40  | -1.5                            | -3.0        | -2.3        | 48.0                     | 15                      | 84.2                 | 11.9                                  | 12.6                        | 3                                                        | 433                                         |
| 363    | 1999 | 3     | 13  | 13:45 | 0.0                             | -2.0        | -1.0        | 60.8                     | 25                      | 64.0                 | 15.6                                  | 16.0                        | 3                                                        | 454                                         |
| 364    | 1999 | 3     | 14  | 5:50  | 0.5                             | -2.5        | -1.0        | 70.0                     | 28                      | 65.8                 | 15.2                                  | 18.4                        | 1                                                        | 467                                         |
| 365    | 1999 | 3     | 23  | 5:45  | 3.0                             | -2.0        | 0.5         | 33.0                     | 12                      | 72.4                 | 13.8                                  | 8.7                         | 1                                                        | 430                                         |
| 366    | 1999 | 3     | 25  | 5:55  | 0.5                             | -6.5        | -3.0        | 45.1                     | 11                      | 107.9                | 9.3                                   | 11.9                        | 1                                                        | 438                                         |
| 367    | 1999 | 3     | 26  | 6:00  | -2.0                            | -7.5        | -4.8        | 28.7                     | 9                       | 83.9                 | 11.9                                  | 7.6                         | 1                                                        | 443                                         |
| 368    | 1999 | 3     | 29  | 5:45  | -4.5                            | -7.0        | -5.8        | 81.0                     | 28                      | 76.1                 | 13.1                                  | 21.3                        | 1                                                        | 454                                         |
| 369    | 1999 | 3     | 30  | 5:45  | -3.5                            | -8.0        | -5.8        | 51.0                     | 17                      | 78.9                 | 12.7                                  | 13.4                        | 1                                                        | 466                                         |
| 370    | 1999 | 4     | 3   | 5:47  | -0.5                            | -7.5        | -4.0        | 16.2                     | 7                       | 60.9                 | 16.4                                  | 4.3                         | 3                                                        | 444                                         |
| 371    | 1999 | 4     | 8   | 5:50  | 0.0                             | -5.0        | -2.5        | 40.0                     | 10                      | 105.3                | 9.5                                   | 10.5                        | 1                                                        | 440                                         |
| 372    | 1999 | 5     | 16  | 7:15  | 6.0                             | -2.0        | 2.0         | 35.0                     | 14                      | 65.8                 | 15.2                                  | 9.2                         | 1                                                        | 377                                         |
| 373    | 1999 | 11    | 23  | 7:50  | -3.5                            | -7.5        | -5.5        | 17.3                     | 8                       | 56.7                 | 17.6                                  | 4.5                         | 3                                                        | 109                                         |
| 374    | 1999 | 12    | 2   | 6:20  | -1.5                            | -3.5        | -2.5        | 90.0                     | 22                      | 107.7                | 9.3                                   | 23.7                        | 3                                                        | 138                                         |
| 375    | 1999 | 12    | 6   | 6:35  | -4.0                            | -5.5        | -4.8        | 85.2                     | 28                      | 80.1                 | 12.5                                  | 22.4                        | 1                                                        | 167                                         |
| 376    | 1999 | 12    | 9   | 5:50  | -3.5                            | -5.0        | -4.3        | 71.0                     | 26                      | 71.9                 | 13.9                                  | 18.7                        | 3                                                        | 185                                         |
| 377    | 1999 | 12    | 12  | 5:45  | -0.5                            | -3.0        | -1.8        | 58.0                     | 25                      | 61.1                 | 16.4                                  | 15.3                        | 1                                                        | 193                                         |
| 378    | 1999 | 12    | 12  | 14:00 | -1.0                            | -5.0        | -3.0        | 64.8                     | 16                      | 106.5                | 9.4                                   | 17.0                        | 1                                                        | 197                                         |
| 379    | 1999 | 12    | 13  | 5:49  | -5.0                            | -9.5        | -7.3        | 39.9                     | 11                      | 95.5                 | 10.5                                  | 10.5                        | 1                                                        | 219                                         |
| 380    | 1999 | 12    | 14  | 6:00  | -7.0                            | -9.0        | -8.0        | 16.1                     | 9                       | 47.1                 | 21.2                                  | 4.2                         | 3                                                        | 196                                         |
| 381    | 1999 | 12    | 15  | 5:50  | 0.5                             | -5.0        | -2.3        | 54.0                     | 12                      | 118.4                | 8.4                                   | 14.2                        | 3                                                        | 208                                         |
| 382    | 1999 | 12    | 15  | 13:40 | 1.0                             | -0.5        | 0.3         | 98.9                     | 22                      | 118.3                | 8.5                                   | 26.0                        | 3                                                        | 225                                         |
| 383    | 1999 | 12    | 17  | 13:30 | -1.0                            | -2.5        | -1.8        | 42.5                     | 13                      | 86.0                 | 11.6                                  | 11.2                        | 3                                                        | 225                                         |
| 384    | 1999 | 12    | 18  | 5:45  | 0.0                             | -3.0        | -1.5        | 58.0                     | 13                      | 117.4                | 8.5                                   | 15.3                        | 1                                                        | 230                                         |
| 385    | 1999 | 12    | 31  | 13:30 | -3.5                            | -5.5        | -4.5        | 21.4                     | 6                       | 93.9                 | 10.7                                  | 5.6                         | 3                                                        | 191                                         |
| 386    | 1999 | 1     | 1   | 13:30 | -4.5                            | -6.5        | -5.5        | 34.1                     | 13                      | 69.0                 | 14.5                                  | 9.0                         | 3                                                        | 205                                         |
| 387    | 2000 | 1     | 4   | 5:50  | -2.0                            | -7.5        | -4.8        | 64.2                     | 19                      | 88.9                 | 11.2                                  | 16.9                        | 1                                                        | 214                                         |
| 388    | 2000 | 1     | 8   | 5:45  | -1.5                            | -4.0        | -2.8        | 53.0                     | 16                      | 87.2                 | 11.5                                  | 13.9                        | 1                                                        | 211                                         |
| 389    | 2000 | 1     | 9   | 6:00  | -6.0                            | -8.0        | -7.0        | 41.2                     | 14                      | 77.4                 | 12.9                                  | 10.8                        | 1                                                        | 225                                         |
| 390    | 2000 | 1     | 11  | 6:20  | -8.5                            | -11.5       | -10.0       | 14.4                     | 7                       | 54.1                 | 18.5                                  | 3.8                         | 3                                                        | 223                                         |
| 391    | 2000 | 1     | 12  | 6:10  | -9.0                            | -11.5       | -10.3       | 40.0                     | 17                      | 61.9                 | 16.2                                  | 10.5                        | 3                                                        | 234                                         |
| 392    | 2000 | 1     | 14  | 6:00  | -5.0                            | -10.0       | -7.5        | 26.0                     | 11                      | 62.2                 | 16.1                                  | 6.8                         | 2                                                        | 242                                         |
| 393    | 2000 | 1     | 14  | 13:24 | -5.0                            | -9.5        | -7.3        | 25.0                     | 11                      | 59.8                 | 16.7                                  | 6.6                         | 2                                                        | 250                                         |
| 394    | 2000 | 1     | 15  | 5:50  | -3.5                            | -9.0        | -6.3        | 45.0                     | 14                      | 84.6                 | 11.8                                  | 11.8                        | 2                                                        | 258                                         |

| Sample | Year | Month | Day | Time  | Sample Interval<br>Temperatures |             |             | Snow<br>Sample<br>Weight | Snow<br>Sample<br>Depth | Snow<br>Density      | Snow<br>Depth<br>to<br>Water<br>Depth | Snow<br>Water<br>Equivalent | Air<br>Flow<br>Type<br>Inflow =1<br>Outflow=2<br>Other=3 | Depth<br>of<br>Snow<br>on<br>Ground |
|--------|------|-------|-----|-------|---------------------------------|-------------|-------------|--------------------------|-------------------------|----------------------|---------------------------------------|-----------------------------|----------------------------------------------------------|-------------------------------------|
|        |      |       |     |       | Max<br>(LST)                    | Min<br>(°C) | Avg<br>(°C) | (g)                      | (cm)                    | (kg/m <sup>3</sup> ) | Ratio                                 | (mm H <sub>2</sub> O)       |                                                          | (cm)                                |
| 395    | 2000 | 1     | 16  | 13:45 | -5.0                            | -10.5       | -7.8        | 31.0                     | 11                      | 74.2                 | 13.5                                  | 8.2                         | 2                                                        | 255                                 |
| 396    | 2000 | 1     | 17  | 5:45  | -4.0                            | -8.0        | -6.0        | 115.5                    | 26                      | 116.9                | 8.6                                   | 30.4                        | 3                                                        | 277                                 |
| 397    | 2000 | 1     | 31  | 6:20  | 4.5                             | -3.5        | 0.5         | 13.7                     | 5                       | 71.8                 | 13.9                                  | 3.6                         | 3                                                        | 232                                 |
| 398    | 2000 | 2     | 1   | 5:55  | -1.5                            | -5.0        | -3.3        | 44.5                     | 12                      | 97.6                 | 10.2                                  | 11.7                        | 1                                                        | 247                                 |
| 399    | 2000 | 2     | 1   | 13:35 | -1.0                            | -2.0        | -1.5        | 20.2                     | 5                       | 106.1                | 9.4                                   | 5.3                         | 1                                                        | 252                                 |
| 400    | 2000 | 2     | 8   | 5:55  | 0.5                             | -4.0        | -1.8        | 16.1                     | 5                       | 84.5                 | 11.8                                  | 4.2                         | 3                                                        | 245                                 |
| 401    | 2000 | 2     | 9   | 6:00  | -1.5                            | -4.5        | -3.0        | 38.2                     | 13                      | 77.3                 | 12.9                                  | 10.1                        | 1                                                        | 255                                 |
| 402    | 2000 | 2     | 22  | 13:20 | 0.5                             | -2.5        | -1.0        | 43.4                     | 10                      | 114.2                | 8.8                                   | 11.4                        | 3                                                        | 246                                 |
| 403    | 2000 | 2     | 26  | 6:20  | -1.5                            | -6.0        | -3.8        | 24.0                     | 9                       | 70.2                 | 14.3                                  | 6.3                         | 3                                                        | 255                                 |
| 404    | 2000 | 2     | 27  | 5:45  | -3.0                            | -6.5        | -4.8        | 19.2                     | 5                       | 100.8                | 9.9                                   | 5.0                         | 3                                                        | 258                                 |
| 405    | 2000 | 3     | 2   | 5:45  | -1.0                            | -5.0        | -3.0        | 54.0                     | 16                      | 88.8                 | 11.3                                  | 14.2                        | 1                                                        | 270                                 |
| 406    | 2000 | 3     | 3   | 13:25 | -1.5                            | -3.0        | -2.3        | 29.5                     | 9                       | 86.3                 | 11.6                                  | 7.8                         | 1                                                        | 279                                 |
| 407    | 2000 | 3     | 4   | 5:45  | -1.5                            | -4.5        | -3.0        | 32.0                     | 10                      | 84.2                 | 11.9                                  | 8.4                         | 3                                                        | 283                                 |
| 408    | 2000 | 3     | 11  | 5:45  | 0.0                             | -4.0        | -2.0        | 38.0                     | 15                      | 66.7                 | 15.0                                  | 10.0                        | 1                                                        | 276                                 |
| 409    | 2000 | 3     | 14  | 5:45  | -1.0                            | -4.0        | -2.5        | 38.4                     | 10                      | 101.1                | 9.9                                   | 10.1                        | 1                                                        | 280                                 |
| 410    | 2000 | 3     | 17  | 13:55 | -2.0                            | -6.0        | -4.0        | 22.0                     | 10                      | 57.9                 | 17.3                                  | 5.8                         | 1                                                        | 292                                 |
| 411    | 2000 | 3     | 22  | 6:10  | 1.5                             | -3.5        | -1.0        | 59.3                     | 19                      | 82.1                 | 12.2                                  | 15.6                        | 3                                                        | 301                                 |
| 412    | 2000 | 3     | 22  | 13:30 | 0.5                             | -1.5        | -0.5        | 39.0                     | 7                       | 146.6                | 6.8                                   | 10.3                        | 3                                                        | 305                                 |
| 413    | 2000 | 3     | 27  | 13:30 | 0.5                             | -2.5        | -1.0        | 26.0                     | 7                       | 97.7                 | 10.2                                  | 6.8                         | 1                                                        | 301                                 |
| 414    | 2000 | 3     | 28  | 6:40  | 2.0                             | -4.5        | -1.3        | 18.5                     | 6                       | 81.1                 | 12.3                                  | 4.9                         | 1                                                        | 301                                 |
| 415    | 2000 | 4     | 15  | 5:45  | 0.0                             | -3.5        | -1.8        | 26.0                     | 9                       | 76.0                 | 13.2                                  | 6.8                         | 3                                                        | 262                                 |
| 416    | 2000 | 4     | 22  | 5:45  | 3.5                             | -1.0        | 1.3         | 49.0                     | 15                      | 86.0                 | 11.6                                  | 12.9                        | 1                                                        | 255                                 |
| 417    | 2000 | 4     | 28  | 5:45  | 2.5                             | -6.5        | -2.0        | 32.0                     | 6                       | 140.4                | 7.1                                   | 8.4                         | 1                                                        | 252                                 |
| 418    | 2000 | 5     | 6   | 7:35  | -1.0                            | -7.0        | -4.0        | 20.6                     | 5                       | 108.4                | 9.2                                   | 5.4                         | 1                                                        | 265                                 |
| 419    | 2000 | 5     | 11  | 7:15  | 1.0                             | -2.0        | -0.5        | 42.0                     | 14                      | 78.9                 | 12.7                                  | 11.1                        | 1                                                        | 282                                 |
| 420    | 2000 | 11    | 25  | 6:30  | 0.0                             | -4.0        | -2.0        | 50.0                     | 14                      | 94.0                 | 10.6                                  | 13.2                        | 1                                                        | 68                                  |
| 421    | 2000 | 11    | 25  | 14:00 | -1.5                            | -4.0        | -2.8        | 40.0                     | 10                      | 105.3                | 9.5                                   | 10.5                        | 1                                                        | 78                                  |
| 422    | 2000 | 11    | 26  | 14:00 | -1.0                            | -5.0        | -3.0        | 25.0                     | 10                      | 65.8                 | 15.2                                  | 6.6                         | 1                                                        | 89                                  |
| 423    | 2000 | 12    | 2   | 6:30  | 0.0                             | -2.0        | -1.0        | 89.0                     | 26                      | 90.1                 | 11.1                                  | 23.4                        | 1                                                        | 112                                 |
| 424    | 2000 | 12    | 15  | 5:55  | -6.0                            | -19.0       | -12.5       | 21.5                     | 13                      | 43.5                 | 23.0                                  | 5.7                         | 2                                                        | 106                                 |
| 425    | 2000 | 12    | 16  | 6:00  | -4.0                            | -16.5       | -10.3       | 63.0                     | 19                      | 87.3                 | 11.5                                  | 16.6                        | 2                                                        | 120                                 |
| 426    | 2000 | 12    | 16  | 13:45 | -1.5                            | -4.0        | -2.8        | 134.0                    | 30                      | 117.5                | 8.5                                   | 35.3                        | 2                                                        | 147                                 |
| 427    | 2000 | 12    | 17  | 5:50  | -1.0                            | -6.0        | -3.5        | 78.0                     | 8                       | 256.6                | 3.9                                   | 20.5                        | 3                                                        | 149                                 |
| 428    | 2000 | 12    | 25  | 6:20  | -3.0                            | -6.0        | -4.5        | 21.5                     | 6                       | 94.3                 | 10.6                                  | 5.7                         | 3                                                        | 136                                 |
| 429    | 2000 | 12    | 26  | 6:00  | 1.5                             | -2.0        | -0.3        | 45.5                     | 14                      | 85.5                 | 11.7                                  | 12.0                        | 3                                                        | 146                                 |
| 430    | 2000 | 12    | 27  | 5:45  | 0.5                             | -2.0        | -0.8        | 54.0                     | 14                      | 101.5                | 9.9                                   | 14.2                        | 1                                                        | 160                                 |
| 431    | 2001 | 1     | 3   | 13:40 | 2.5                             | -2.0        | 0.3         | 55.0                     | 19                      | 76.2                 | 13.1                                  | 14.5                        | 3                                                        | 154                                 |
| 432    | 2001 | 1     | 4   | 5:45  | -1.0                            | -7.5        | -4.3        | 41.1                     | 7                       | 154.5                | 6.5                                   | 10.8                        | 3                                                        | 155                                 |
| 433    | 2001 | 1     | 5   | 6:15  | 1.0                             | -1.5        | -0.3        | 127.1                    | 20                      | 167.2                | 6.0                                   | 33.4                        | 1                                                        | 170                                 |
| 434    | 2001 | 1     | 10  | 5:55  | 2.0                             | -4.0        | -1.0        | 41.5                     | 14                      | 78.0                 | 12.8                                  | 10.9                        | 3                                                        | 173                                 |

| Sample | Year | Month | Day | Time  | Sample Interval<br>Temperatures |             |             | Snow<br>Sample<br>Weight | Snow<br>Sample<br>Depth | Snow<br>Density      | Snow<br>Depth<br>to<br>Water<br>Depth | Snow<br>Water<br>Equivalent | Air<br>Flow<br>Type<br>Inflow =1<br>Outflow=2<br>Other=3 | Depth<br>of<br>Snow<br>on<br>Ground |
|--------|------|-------|-----|-------|---------------------------------|-------------|-------------|--------------------------|-------------------------|----------------------|---------------------------------------|-----------------------------|----------------------------------------------------------|-------------------------------------|
|        |      |       |     |       | Max<br>(LST)                    | Min<br>(°C) | Avg<br>(°C) | (g)                      | (cm)                    | (kg/m <sup>3</sup> ) | Ratio                                 | (mm H <sub>2</sub> O)       |                                                          | (cm)                                |
| 435    | 2001 | 1     | 19  | 6:20  | 0.5                             | -5.5        | -2.5        | 34.1                     | 8                       | 112.2                | 8.9                                   | 9.0                         | 3                                                        | 163                                 |
| 436    | 2001 | 1     | 21  | 5:45  | -3.0                            | -4.0        | -3.5        | 54.0                     | 17                      | 83.6                 | 12.0                                  | 14.2                        | 3                                                        | 184                                 |
| 437    | 2001 | 1     | 29  | 5:50  | -1.5                            | -4.5        | -3.0        | 61.0                     | 21                      | 76.4                 | 13.1                                  | 16.1                        | 1                                                        | 184                                 |
| 438    | 2001 | 1     | 30  | 5:50  | -3.0                            | -8.0        | -5.5        | 20.0                     | 10                      | 52.6                 | 19.0                                  | 5.3                         | 1                                                        | 185                                 |
| 439    | 2001 | 2     | 2   | 6:00  | 0.5                             | -4.0        | -1.8        | 53.6                     | 15                      | 94.0                 | 10.6                                  | 14.1                        | 1                                                        | 195                                 |
| 440    | 2001 | 2     | 2   | 13:30 | -3.5                            | -4.5        | -4.0        | 16.0                     | 6                       | 70.0                 | 14.3                                  | 4.2                         | 1                                                        | 200                                 |
| 441    | 2001 | 3     | 1   | 13:45 | -2.5                            | -5.0        | -3.8        | 16.0                     | 5                       | 84.2                 | 11.9                                  | 4.2                         | 3                                                        | 175                                 |
| 442    | 2001 | 3     | 2   | 6:00  | -3.0                            | -7.0        | -5.0        | 43.9                     | 11                      | 105.0                | 9.5                                   | 11.6                        | 1                                                        | 183                                 |
| 443    | 2001 | 3     | 9   | 6:20  | 2.5                             | -7.5        | -2.5        | 30.0                     | 7                       | 112.8                | 8.9                                   | 7.9                         | 2                                                        | 183                                 |
| 444    | 2001 | 3     | 18  | 5:50  | -0.5                            | -2.5        | -1.5        | 28.0                     | 9                       | 81.9                 | 12.2                                  | 7.4                         | 1                                                        | 198                                 |
| 445    | 2001 | 3     | 18  | 13:45 | 1.0                             | -0.5        | 0.3         | 46.5                     | 13                      | 94.1                 | 10.6                                  | 12.2                        | 1                                                        | 209                                 |
| 446    | 2001 | 3     | 19  | 5:50  | 0.5                             | -8.0        | -3.8        | 33.0                     | 10                      | 86.8                 | 11.5                                  | 8.7                         | 1                                                        | 215                                 |
| 447    | 2001 | 4     | 5   | 6:20  | 3.5                             | -4.0        | -0.3        | 20.6                     | 9                       | 60.2                 | 16.6                                  | 5.4                         | 1                                                        | 214                                 |
| 448    | 2001 | 4     | 6   | 5:55  | -1.5                            | -6.0        | -3.8        | 36.9                     | 13                      | 74.7                 | 13.4                                  | 9.7                         | 1                                                        | 224                                 |
| 449    | 2001 | 4     | 17  | 5:45  | 7.0                             | -2.0        | 2.5         | 51.0                     | 15                      | 89.5                 | 11.2                                  | 13.4                        | 1                                                        | 220                                 |
| 450    | 2001 | 4     | 18  | 5:45  | -2.0                            | -4.0        | -3.0        | 47.8                     | 15                      | 83.9                 | 11.9                                  | 12.6                        | 1                                                        | 231                                 |
| 451    | 2001 | 5     | 4   | 13:35 | 0.5                             | -0.5        | 0.0         | 23.7                     | 5                       | 124.7                | 8.0                                   | 6.2                         | 1                                                        | 197                                 |
| 452    | 2001 | 5     | 5   | 6:25  | 1.0                             | -5.0        | -2.0        | 66.5                     | 19                      | 92.1                 | 10.9                                  | 17.5                        | 1                                                        | 219                                 |
| 453    | 2001 | 5     | 29  | 6:45  | -0.5                            | -3.0        | -1.8        | 39.0                     | 13                      | 78.9                 | 12.7                                  | 10.3                        | 1                                                        | 149                                 |
| 454    | 2001 | 11    | 16  | 8:50  | 1.5                             | -2.0        | -0.3        | 53.0                     | 13                      | 107.3                | 9.3                                   | 13.9                        | 1                                                        | 73                                  |
| 455    | 2001 | 11    | 28  | 13:55 | -6.5                            | -8.5        | -7.5        | 32.5                     | 16                      | 53.5                 | 18.7                                  | 8.6                         | 2                                                        | 96                                  |
| 456    | 2001 | 11    | 29  | 6:20  | -3.0                            | -7.0        | -5.0        | 34.0                     | 12                      | 74.6                 | 13.4                                  | 8.9                         | 1                                                        | 101                                 |
| 457    | 2001 | 12    | 1   | 5:50  | -3.0                            | -5.0        | -4.0        | 69.0                     | 30                      | 60.5                 | 16.5                                  | 18.2                        | 3                                                        | 128                                 |
| 458    | 2001 | 12    | 1   | 13:55 | -2.5                            | -3.0        | -2.8        | 68.0                     | 31                      | 57.7                 | 17.3                                  | 17.9                        | 3                                                        | 150                                 |
| 459    | 2001 | 12    | 2   | 5:45  | -2.0                            | -5.0        | -3.5        | 38.4                     | 14                      | 72.2                 | 13.9                                  | 10.1                        | 3                                                        | 149                                 |
| 460    | 2001 | 12    | 4   | 6:45  | -7.5                            | -11.0       | -9.3        | 22.7                     | 9                       | 66.4                 | 15.1                                  | 6.0                         | 3                                                        | 147                                 |
| 461    | 2001 | 12    | 6   | 6:25  | -5.0                            | -8.5        | -6.8        | 12.4                     | 8                       | 40.8                 | 24.5                                  | 3.3                         | 3                                                        | 136                                 |
| 462    | 2001 | 12    | 8   | 5:50  | -1.5                            | -5.0        | -3.3        | 47.0                     | 13                      | 95.1                 | 10.5                                  | 12.4                        | 3                                                        | 139                                 |
| 463    | 2001 | 12    | 8   | 13:45 | -2.0                            | -3.0        | -2.5        | 101.0                    | 35                      | 75.9                 | 13.2                                  | 26.6                        | 3                                                        | 166                                 |
| 464    | 2001 | 12    | 10  | 6:45  | -7.0                            | -7.5        | -7.3        | 12.9                     | 9                       | 37.6                 | 26.6                                  | 3.4                         | 3                                                        | 160                                 |
| 465    | 2001 | 12    | 13  | 5:50  | 1.5                             | -5.0        | -1.8        | 65.0                     | 19                      | 90.0                 | 11.1                                  | 17.1                        | 3                                                        | 165                                 |
| 466    | 2001 | 12    | 14  | 5:50  | -1.5                            | -5.0        | -3.3        | 68.0                     | 20                      | 89.5                 | 11.2                                  | 17.9                        | 1                                                        | 183                                 |
| 467    | 2001 | 12    | 16  | 5:50  | 0.5                             | -10.0       | -4.8        | 173.3                    | 55                      | 82.9                 | 12.1                                  | 45.6                        | 1                                                        | 220                                 |
| 468    | 2001 | 12    | 16  | 13:45 | 0.0                             | -0.5        | -0.3        | 39.0                     | 15                      | 68.4                 | 14.6                                  | 10.3                        | 1                                                        | 227                                 |
| 469    | 2001 | 12    | 17  | 5:50  | 0.0                             | -9.5        | -4.8        | 148.8                    | 41                      | 95.5                 | 10.5                                  | 39.2                        | 1                                                        | 244                                 |
| 470    | 2001 | 12    | 18  | 6:15  | -6.5                            | -8.0        | -7.3        | 20.7                     | 7                       | 77.6                 | 12.9                                  | 5.4                         | 3                                                        | 236                                 |
| 471    | 2001 | 12    | 18  | 13:45 | -5.0                            | -6.5        | -5.8        | 47.0                     | 15                      | 82.5                 | 12.1                                  | 12.4                        | 3                                                        | 247                                 |
| 472    | 2001 | 12    | 19  | 5:50  | -4.0                            | -9.0        | -6.5        | 43.8                     | 16                      | 72.0                 | 13.9                                  | 11.5                        | 3                                                        | 245                                 |
| 473    | 2002 | 1     | 3   | 5:40  | 1.0                             | -2.0        | -0.5        | 37.0                     | 11                      | 88.5                 | 11.3                                  | 9.7                         | 1                                                        | 193                                 |
| 474    | 2002 | 1     | 6   | 5:45  | 0.0                             | -1.0        | -0.5        | 41.0                     | 13                      | 83.0                 | 12.0                                  | 10.8                        | 3                                                        | 200                                 |

| Sample | Year | Month | Day | Time  | Sample Interval<br>Temperatures |             |             | Snow<br>Sample<br>Weight | Snow<br>Sample<br>Depth | Snow<br>Density      | Snow<br>Depth<br>to<br>Water<br>Depth | Snow<br>Water<br>Equivalent | Air<br>Flow<br>Type               | Depth<br>of<br>Snow<br>on<br>Ground |
|--------|------|-------|-----|-------|---------------------------------|-------------|-------------|--------------------------|-------------------------|----------------------|---------------------------------------|-----------------------------|-----------------------------------|-------------------------------------|
|        |      |       |     |       | Max<br>(LST)                    | Min<br>(°C) | Avg<br>(°C) | (g)                      | (cm)                    | (kg/m <sup>3</sup> ) | Ratio                                 | (mm H <sub>2</sub> O)       | Inflow =1<br>Outflow=2<br>Other=3 | (cm)                                |
| 475    | 2002 | 1     | 8   | 5:45  | 0.0                             | -0.5        | -0.3        | 30.0                     | 8                       | 98.7                 | 10.1                                  | 7.9                         | 3                                 | 199                                 |
| 476    | 2002 | 1     | 12  | 5:45  | 2.5                             | -2.0        | 0.3         | 22.0                     | 8                       | 72.4                 | 13.8                                  | 5.8                         | 1                                 | 201                                 |
| 477    | 2002 | 1     | 20  | 5:45  | -4.5                            | -7.5        | -6.0        | 31.0                     | 13                      | 62.8                 | 15.9                                  | 8.2                         | 1                                 | 208                                 |
| 478    | 2002 | 1     | 25  | 5:45  | -2.0                            | -7.0        | -4.5        | 30.0                     | 10                      | 78.9                 | 12.7                                  | 7.9                         | 3                                 | 223                                 |
| 479    | 2002 | 1     | 26  | 13:45 | -10.0                           | -11.0       | -10.5       | 23.3                     | 10                      | 61.3                 | 16.3                                  | 6.1                         | 3                                 | 237                                 |
| 480    | 2002 | 1     | 31  | 6:05  | -3.5                            | -7.0        | -5.3        | 15.5                     | 8                       | 51.0                 | 19.6                                  | 4.1                         | 3                                 | 228                                 |
| 481    | 2002 | 2     | 3   | 5:50  | -2.5                            | -4.5        | -3.5        | 36.7                     | 17                      | 56.8                 | 17.6                                  | 9.7                         | 1                                 | 240                                 |
| 482    | 2002 | 2     | 5   | 13:48 | -2.5                            | -4.0        | -3.3        | 48.4                     | 12                      | 106.1                | 9.4                                   | 12.7                        | 3                                 | 240                                 |
| 483    | 2002 | 2     | 6   | 13:30 | -3.5                            | -4.0        | -3.8        | 47.8                     | 16                      | 78.6                 | 12.7                                  | 12.6                        | 3                                 | 255                                 |
| 484    | 2002 | 2     | 7   | 5:45  | -2.5                            | -5.5        | -4.0        | 77.0                     | 33                      | 61.4                 | 16.3                                  | 20.3                        | 3                                 | 280                                 |
| 485    | 2002 | 2     | 7   | 13:30 | -3.5                            | -6.0        | -4.8        | 18.7                     | 6                       | 82.0                 | 12.2                                  | 4.9                         | 3                                 | 280                                 |
| 486    | 2002 | 2     | 19  | 6:00  | -1.5                            | -3.5        | -2.5        | 74.6                     | 23                      | 85.4                 | 11.7                                  | 19.6                        | 1                                 | 265                                 |
| 487    | 2002 | 2     | 19  | 13:49 | -2.0                            | -3.5        | -2.8        | 23.1                     | 7                       | 86.7                 | 11.5                                  | 6.1                         | 1                                 | 272                                 |
| 488    | 2002 | 2     | 22  | 5:45  | 1.0                             | -1.0        | 0.0         | 136.0                    | 50                      | 71.6                 | 14.0                                  | 35.8                        | 3                                 | 320                                 |
| 489    | 2002 | 3     | 10  | 5:45  | -4.0                            | -6.0        | -5.0        | 31.0                     | 11                      | 74.2                 | 13.5                                  | 8.2                         | 3                                 | 282                                 |
| 490    | 2002 | 3     | 11  | 6:10  | -1.0                            | -3.5        | -2.3        | 73.1                     | 37                      | 52.0                 | 19.2                                  | 19.2                        | 1                                 | 315                                 |
| 491    | 2002 | 3     | 11  | 13:45 | -0.5                            | -3.0        | -1.8        | 17.0                     | 10                      | 44.7                 | 22.4                                  | 4.5                         | 1                                 | 316                                 |
| 492    | 2002 | 3     | 12  | 5:50  | -2.0                            | -6.0        | -4.0        | 46.5                     | 12                      | 102.0                | 9.8                                   | 12.2                        | 1                                 | 321                                 |
| 493    | 2002 | 3     | 13  | 5:50  | -4.0                            | -6.0        | -5.0        | 27.2                     | 9                       | 79.5                 | 12.6                                  | 7.2                         | 1                                 | 322                                 |
| 494    | 2002 | 3     | 16  | 6:15  | -3.0                            | -17.0       | -10.0       | 25.5                     | 7                       | 95.9                 | 10.4                                  | 6.7                         | 2                                 | 313                                 |
| 495    | 2002 | 3     | 19  | 6:00  | -10.0                           | -12.5       | -11.3       | 20.4                     | 13                      | 41.3                 | 24.2                                  | 5.4                         | 2                                 | 318                                 |
| 496    | 2002 | 4     | 13  | 5:45  | 2.5                             | 1.5         | 2.0         | 60.0                     | 9                       | 175.4                | 5.7                                   | 15.8                        | 1                                 | 276                                 |
| 497    | 2002 | 4     | 26  | 13:45 | -2.0                            | -3.5        | -2.8        | 20.0                     | 8                       | 65.8                 | 15.2                                  | 5.3                         | 3                                 | 269                                 |
| 498    | 2002 | 5     | 3   | 6:50  | 3.5                             | -8.0        | -2.3        | 38.0                     | 9                       | 111.1                | 9.0                                   | 10.0                        | 1                                 | 247                                 |
| 499    | 2002 | 5     | 17  | 6:50  | 8.0                             | -2.0        | 3.0         | 37.0                     | 11                      | 88.5                 | 11.3                                  | 9.7                         | 1                                 | 238                                 |
| 500    | 2002 | 12    | 12  | 13:50 | 3.0                             | 0.5         | 1.8         | 55.6                     | 7                       | 209.0                | 4.8                                   | 14.6                        | 1                                 | 70                                  |
| 501    | 2002 | 12    | 13  | 6:40  | 1.5                             | -3.0        | -0.8        | 39.9                     | 10                      | 104.9                | 9.5                                   | 10.5                        | 1                                 | 75                                  |
| 502    | 2002 | 12    | 14  | 6:30  | -1.0                            | -2.5        | -1.8        | 66.0                     | 17                      | 102.2                | 9.8                                   | 17.4                        | 3                                 | 88                                  |
| 503    | 2002 | 12    | 14  | 13:40 | 0.5                             | -2.5        | -1.0        | 73.0                     | 11                      | 174.6                | 5.7                                   | 19.2                        | 3                                 | 98                                  |
| 504    | 2002 | 12    | 15  | 6:25  | 1.5                             | -2.0        | -0.3        | 170.0                    | 31                      | 144.3                | 6.9                                   | 44.7                        | 3                                 | 118                                 |
| 505    | 2002 | 12    | 16  | 6:25  | -1.5                            | -3.0        | -2.3        | 73.0                     | 20                      | 96.1                 | 10.4                                  | 19.2                        | 1                                 | 137                                 |
| 506    | 2002 | 12    | 19  | 6:20  | -6.0                            | -8.0        | -7.0        | 11.5                     | 5                       | 60.5                 | 16.5                                  | 3.0                         | 2                                 | 130                                 |
| 507    | 2002 | 12    | 19  | 13:40 | -6.0                            | -8.0        | -7.0        | 21.1                     | 8                       | 69.4                 | 14.4                                  | 5.6                         | 2                                 | 130                                 |
| 508    | 2002 | 12    | 25  | 6:00  | -3.0                            | -7.0        | -5.0        | 75.1                     | 35                      | 56.5                 | 17.7                                  | 19.8                        | 3                                 | 148                                 |
| 509    | 2002 | 12    | 25  | 13:30 | -3.0                            | -4.0        | -3.5        | 143.9                    | 64                      | 59.2                 | 16.9                                  | 37.9                        | 3                                 | 197                                 |
| 510    | 2002 | 12    | 26  | 5:55  | -5.0                            | -7.5        | -6.3        | 112.3                    | 43                      | 68.7                 | 14.6                                  | 29.6                        | 1                                 | 210                                 |
| 511    | 2002 | 12    | 26  | 14:30 | -5.0                            | -7.5        | -6.3        | 225.2                    | 84                      | 70.6                 | 14.2                                  | 59.3                        | 1                                 | 210                                 |
| 512    | 2002 | 12    | 27  | 6:30  | -7.5                            | -9.5        | -8.5        | 23.3                     | 9                       | 68.1                 | 14.7                                  | 6.1                         | 3                                 | 196                                 |
| 513    | 2002 | 12    | 27  | 13:40 | -7.0                            | -9.0        | -8.0        | 40.7                     | 11                      | 97.4                 | 10.3                                  | 10.7                        | 3                                 | 200                                 |
| 514    | 2002 | 12    | 30  | 5:50  | -5.0                            | -12.0       | -8.5        | 28.5                     | 9                       | 83.3                 | 12.0                                  | 7.5                         | 3                                 | 187                                 |

| Sample | Year | Month | Day | Time  | Sample Interval<br>Temperatures |             |             | Snow<br>Sample<br>Weight | Snow<br>Sample<br>Depth | Snow<br>Density      | Snow<br>Depth<br>to<br>Water<br>Depth | Snow<br>Water<br>Equivalent | Air<br>Flow<br>Type<br>Inflow =1<br>Outflow=2<br>Other=3 | Depth<br>of<br>Snow<br>on<br>Ground |
|--------|------|-------|-----|-------|---------------------------------|-------------|-------------|--------------------------|-------------------------|----------------------|---------------------------------------|-----------------------------|----------------------------------------------------------|-------------------------------------|
|        |      |       |     |       | Max<br>(LST)                    | Min<br>(°C) | Avg<br>(°C) | (g)                      | (cm)                    | (kg/m <sup>3</sup> ) | Ratio                                 | (mm H <sub>2</sub> O)       |                                                          | (cm)                                |
| 515    | 2003 | 1     | 2   | 6:10  | 1.0                             | -1.0        | 0.0         | 63.3                     | 26                      | 64.1                 | 15.6                                  | 16.7                        | 3                                                        | 205                                 |
| 516    | 2003 | 1     | 2   | 13:30 | 1.5                             | -1.5        | 0.0         | 80.5                     | 18                      | 117.7                | 8.5                                   | 21.2                        | 3                                                        | 218                                 |
| 517    | 2003 | 1     | 3   | 5:50  | 1.0                             | -4.0        | -1.5        | 107.5                    | 23                      | 123.0                | 8.1                                   | 28.3                        | 1                                                        | 218                                 |
| 518    | 2003 | 1     | 4   | 5:45  | 1.5                             | 1.0         | 1.3         | 62.5                     | 9                       | 182.7                | 5.5                                   | 16.4                        | 3                                                        | 216                                 |
| 519    | 2003 | 1     | 12  | 6:20  | 0.0                             | -1.5        | -0.8        | 34.5                     | 8                       | 113.5                | 8.8                                   | 9.1                         | 2                                                        | 194                                 |
| 520    | 2003 | 1     | 14  | 6:00  | -0.5                            | -5.0        | -2.8        | 33.0                     | 11                      | 78.9                 | 12.7                                  | 8.7                         | 3                                                        | 198                                 |
| 521    | 2003 | 1     | 22  | 13:40 | 0.5                             | -7.0        | -3.3        | 55.0                     | 11                      | 131.6                | 7.6                                   | 14.5                        | 2                                                        | 191                                 |
| 522    | 2003 | 1     | 23  | 6:00  | 1.5                             | -1.0        | 0.3         | 130.0                    | 21                      | 162.9                | 6.1                                   | 34.2                        | 3                                                        | 207                                 |
| 523    | 2003 | 1     | 24  | 5:50  | 0.0                             | -3.5        | -1.8        | 17.9                     | 6                       | 78.5                 | 12.7                                  | 4.7                         | 3                                                        | 208                                 |
| 524    | 2003 | 1     | 30  | 6:20  | -1.0                            | -3.0        | -2.0        | 21.0                     | 6                       | 92.1                 | 10.9                                  | 5.5                         | 3                                                        | 192                                 |
| 525    | 2003 | 1     | 30  | 13:35 | -1.0                            | -3.0        | -2.0        | 45.5                     | 11                      | 108.9                | 9.2                                   | 12.0                        | 3                                                        | 192                                 |
| 526    | 2003 | 1     | 31  | 5:50  | 1.5                             | -2.0        | -0.3        | 49.0                     | 6                       | 214.9                | 4.7                                   | 12.9                        | 1                                                        | 195                                 |
| 527    | 2003 | 2     | 15  | 13:50 | 0.5                             | -1.0        | -0.3        | 28.5                     | 11                      | 68.2                 | 14.7                                  | 7.5                         | 2                                                        | 194                                 |
| 528    | 2003 | 2     | 16  | 5:50  | 0.0                             | -2.0        | -1.0        | 41.0                     | 14                      | 77.1                 | 13.0                                  | 10.8                        | 1                                                        | 205                                 |
| 529    | 2003 | 2     | 16  | 13:45 | 0.0                             | -2.0        | -1.0        | 22.0                     | 22                      | 26.3                 | 38.0                                  | 5.8                         | 1                                                        | 205                                 |
| 530    | 2003 | 2     | 20  | 13:30 | -2.5                            | -4.5        | -3.5        | 33.4                     | 13                      | 67.6                 | 14.8                                  | 8.8                         | 1                                                        | 215                                 |
| 531    | 2003 | 3     | 7   | 6:15  | -4.5                            | -18.5       | -11.5       | 42.5                     | 16                      | 69.9                 | 14.3                                  | 11.2                        | 2                                                        | 211                                 |
| 532    | 2003 | 3     | 9   | 5:50  | -7.0                            | -10.0       | -8.5        | 34.0                     | 10                      | 89.5                 | 11.2                                  | 8.9                         | 2                                                        | 219                                 |
| 533    | 2003 | 3     | 11  | 13:55 | 0.0                             | -2.5        | -1.3        | 28.7                     | 8                       | 94.4                 | 10.6                                  | 7.6                         | 1                                                        | 222                                 |
| 534    | 2003 | 3     | 12  | 14:15 | 0.5                             | -3.5        | -1.5        | 58.0                     | 18                      | 84.8                 | 11.8                                  | 15.3                        | 3                                                        | 237                                 |
| 535    | 2003 | 3     | 13  | 5:45  | 1.0                             | -3.5        | -1.3        | 252.4                    | 54                      | 123.0                | 8.1                                   | 66.4                        | 3                                                        | 279                                 |
| 536    | 2003 | 3     | 13  | 13:30 | 1.5                             | -0.5        | 0.5         | 179.5                    | 19                      | 248.6                | 4.0                                   | 47.2                        | 3                                                        | 290                                 |
| 537    | 2003 | 3     | 14  | 5:50  | 1.0                             | -0.5        | 0.3         | 200.0                    | 29                      | 181.5                | 5.5                                   | 52.6                        | 3                                                        | 297                                 |
| 538    | 2003 | 3     | 15  | 6:00  | 0.5                             | 0.0         | 0.3         | 54.0                     | 16                      | 88.8                 | 11.3                                  | 14.2                        | 1                                                        | 298                                 |
| 539    | 2003 | 3     | 15  | 14:02 | 1.0                             | -1.0        | 0.0         | 31.0                     | 8                       | 102.0                | 9.8                                   | 8.2                         | 1                                                        | 299                                 |
| 540    | 2003 | 3     | 17  | 5:50  | -1.0                            | -8.0        | -4.5        | 14.5                     | 7                       | 54.5                 | 18.3                                  | 3.8                         | 1                                                        | 295                                 |
| 541    | 2003 | 3     | 18  | 13:55 | -2.5                            | -4.5        | -3.5        | 11.5                     | 7                       | 43.2                 | 23.1                                  | 3.0                         | 1                                                        | 294                                 |
| 542    | 2003 | 3     | 19  | 5:50  | -1.5                            | -7.0        | -4.3        | 32.5                     | 8                       | 106.9                | 9.4                                   | 8.6                         | 3                                                        | 290                                 |
| 543    | 2003 | 3     | 20  | 5:45  | -0.5                            | -1.0        | -0.8        | 61.5                     | 21                      | 77.1                 | 13.0                                  | 16.2                        | 1                                                        | 303                                 |
| 544    | 2003 | 3     | 21  | 5:45  | -1.0                            | -6.0        | -3.5        | 32.0                     | 10                      | 84.2                 | 11.9                                  | 8.4                         | 1                                                        | 303                                 |
| 545    | 2003 | 3     | 22  | 5:45  | 1.0                             | -2.5        | -0.8        | 93.0                     | 31                      | 78.9                 | 12.7                                  | 24.5                        | 1                                                        | 325                                 |
| 546    | 2003 | 3     | 22  | 13:48 | -0.5                            | -4.0        | -2.3        | 31.0                     | 6                       | 136.0                | 7.4                                   | 8.2                         | 1                                                        | 320                                 |
| 547    | 2003 | 3     | 25  | 6:00  | -2.0                            | -6.0        | -4.0        | 17.5                     | 8                       | 57.6                 | 17.4                                  | 4.6                         | 3                                                        | 309                                 |
| 548    | 2003 | 4     | 1   | 6:10  | -0.5                            | -5.5        | -3.0        | 13.0                     | 7                       | 48.9                 | 20.5                                  | 3.4                         | 1                                                        | 283                                 |
| 549    | 2003 | 4     | 2   | 6:15  | -0.5                            | -8.5        | -4.5        | 25.8                     | 8                       | 84.9                 | 11.8                                  | 6.8                         | 3                                                        | 286                                 |
| 550    | 2003 | 4     | 4   | 6:15  | -4.0                            | -10.0       | -7.0        | 12.5                     | 5                       | 65.8                 | 15.2                                  | 3.3                         | 1                                                        | 285                                 |
| 551    | 2003 | 4     | 7   | 13:45 | -1.0                            | -4.0        | -2.5        | 33.0                     | 9                       | 96.5                 | 10.4                                  | 8.7                         | 1                                                        | 292                                 |
| 552    | 2003 | 4     | 8   | 5:45  | 0.0                             | -1.0        | -0.5        | 98.0                     | 32                      | 80.6                 | 12.4                                  | 25.8                        | 1                                                        | 317                                 |
| 553    | 2003 | 4     | 8   | 13:45 | 0.0                             | -1.0        | -0.5        | 110.0                    | 35                      | 82.7                 | 12.1                                  | 28.9                        | 1                                                        | 317                                 |
| 554    | 2003 | 4     | 9   | 5:45  | 1.0                             | -4.5        | -1.8        | 137.0                    | 39                      | 92.4                 | 10.8                                  | 36.1                        | 1                                                        | 348                                 |

| Sample | Year | Month | Day | Time  | Sample Interval<br>Temperatures |             |             | Snow<br>Sample<br>Weight | Snow<br>Sample<br>Depth | Snow<br>Density      | Snow<br>Depth<br>to<br>Water<br>Depth | Snow<br>Water<br>Equivalent | Air<br>Flow<br>Type               | Depth<br>of<br>Snow<br>on<br>Ground |
|--------|------|-------|-----|-------|---------------------------------|-------------|-------------|--------------------------|-------------------------|----------------------|---------------------------------------|-----------------------------|-----------------------------------|-------------------------------------|
|        |      |       |     |       | Max<br>(LST)                    | Min<br>(°C) | Avg<br>(°C) | (g)                      | (cm)                    | (kg/m <sup>3</sup> ) | Ratio                                 | (mm H <sub>2</sub> O)       | Inflow =1<br>Outflow=2<br>Other=3 | (cm)                                |
| 555    | 2003 | 4     | 11  | 5:55  | 3.0                             | -2.0        | 0.5         | 44.8                     | 15                      | 78.6                 | 12.7                                  | 11.8                        | 1                                 | 338                                 |
| 556    | 2003 | 4     | 14  | 5:50  | 2.0                             | -2.5        | -0.3        | 30.0                     | 8                       | 98.7                 | 10.1                                  | 7.9                         | 1                                 | 321                                 |
| 557    | 2003 | 4     | 25  | 6:20  | 0.0                             | -4.0        | -2.0        | 49.0                     | 14                      | 92.1                 | 10.9                                  | 12.9                        | 1                                 | 311                                 |
| 558    | 2003 | 4     | 25  | 14:00 | 0.0                             | -4.0        | -2.0        | 62.0                     | 16                      | 102.0                | 9.8                                   | 16.3                        | 1                                 | 311                                 |
| 559    | 2003 | 4     | 27  | 6:15  | 3.5                             | -1.5        | 1.0         | 16.0                     | 6                       | 70.2                 | 14.3                                  | 4.2                         | 3                                 | 303                                 |
| 560    | 2003 | 11    | 25  | 7:50  | -5.0                            | -8.5        | -6.8        | 36.0                     | 14                      | 67.7                 | 14.8                                  | 9.5                         | 1                                 | 87                                  |
| 561    | 2003 | 11    | 28  | 6:30  | 0.0                             | -4.0        | -2.0        | 116.0                    | 26                      | 117.4                | 8.5                                   | 30.5                        | 3                                 | 100                                 |
| 562    | 2003 | 11    | 28  | 13:50 | -0.5                            | -4.5        | -2.5        | 75.0                     | 16                      | 123.4                | 8.1                                   | 19.7                        | 3                                 | 114                                 |
| 563    | 2003 | 12    | 3   | 5:45  | 1.5                             | -8.0        | -3.3        | 83.5                     | 12                      | 183.1                | 5.5                                   | 22.0                        | 1                                 | 103                                 |
| 564    | 2003 | 12    | 5   | 6:15  | 0.5                             | -2.0        | -0.8        | 88.0                     | 26                      | 89.1                 | 11.2                                  | 23.2                        | 3                                 | 127                                 |
| 565    | 2003 | 12    | 5   | 13:30 | -1.5                            | -2.5        | -2.0        | 28.7                     | 11                      | 68.7                 | 14.6                                  | 7.6                         | 3                                 | 135                                 |
| 566    | 2003 | 12    | 6   | 5:45  | -0.5                            | -6.0        | -3.3        | 110.0                    | 30                      | 96.5                 | 10.4                                  | 28.9                        | 1                                 | 152                                 |
| 567    | 2003 | 12    | 7   | 6:05  | -3.5                            | -8.0        | -5.8        | 17.3                     | 7                       | 65.0                 | 15.4                                  | 4.6                         | 3                                 | 149                                 |
| 568    | 2003 | 12    | 12  | 5:45  | -2.0                            | -4.5        | -3.3        | 31.0                     | 12                      | 68.0                 | 14.7                                  | 8.2                         | 3                                 | 137                                 |
| 569    | 2003 | 12    | 14  | 6:10  | -3.5                            | -6.0        | -4.8        | 35.0                     | 14                      | 65.8                 | 15.2                                  | 9.2                         | 3                                 | 145                                 |
| 570    | 2003 | 12    | 14  | 13:20 | -4.5                            | -5.5        | -5.0        | 18.0                     | 7                       | 67.7                 | 14.8                                  | 4.7                         | 1                                 | 149                                 |
| 571    | 2003 | 12    | 16  | 5:45  | -4.0                            | -5.0        | -4.5        | 60.0                     | 24                      | 65.8                 | 15.2                                  | 15.8                        | 3                                 | 166                                 |
| 572    | 2003 | 12    | 16  | 14:30 | -2.5                            | -4.0        | -3.3        | 74.8                     | 26                      | 75.7                 | 13.2                                  | 19.7                        | 1                                 | 183                                 |
| 573    | 2003 | 12    | 17  | 5:45  | -3.0                            | -4.5        | -3.8        | 110.3                    | 37                      | 78.4                 | 12.8                                  | 29.0                        | 3                                 | 176                                 |
| 574    | 2003 | 12    | 21  | 6:10  | -0.5                            | -3.0        | -1.8        | 15.8                     | 5                       | 83.2                 | 12.0                                  | 4.2                         | 3                                 | 158                                 |
| 575    | 2003 | 12    | 23  | 13:40 | 2.5                             | -1.0        | 0.8         | 48.3                     | 13                      | 97.7                 | 10.2                                  | 12.7                        | 2                                 | 152                                 |
| 576    | 2003 | 12    | 24  | 5:40  | 0.0                             | -2.0        | -1.0        | 48.3                     | 13                      | 97.7                 | 10.2                                  | 12.7                        | 3                                 | 159                                 |
| 577    | 2003 | 12    | 24  | 13:35 | 0.5                             | -2.5        | -1.0        | 55.0                     | 17                      | 85.1                 | 11.7                                  | 14.5                        | 3                                 | 175                                 |
| 578    | 2003 | 12    | 25  | 5:45  | -1.5                            | -5.0        | -3.3        | 72.0                     | 22                      | 86.1                 | 11.6                                  | 18.9                        | 1                                 | 183                                 |
| 579    | 2003 | 12    | 25  | 13:50 | -1.5                            | -5.0        | -3.3        | 100.0                    | 30                      | 87.7                 | 11.4                                  | 26.3                        | 1                                 | 183                                 |
| 580    | 2003 | 12    | 26  | 5:10  | -5.0                            | -11.5       | -8.3        | 21.3                     | 10                      | 55.9                 | 17.9                                  | 5.6                         | 3                                 | 183                                 |
| 581    | 2003 | 12    | 27  | 6:15  | -7.5                            | -13.0       | -10.3       | 12.5                     | 7                       | 47.0                 | 21.3                                  | 3.3                         | 3                                 | 181                                 |
| 582    | 2003 | 12    | 28  | 5:50  | -6.5                            | -12.5       | -9.5        | 27.8                     | 9                       | 81.3                 | 12.3                                  | 7.3                         | 1                                 | 182                                 |
| 583    | 2004 | 1     | 7   | 5:40  | -4.0                            | -8.5        | -6.3        | 24.5                     | 8                       | 80.6                 | 12.4                                  | 6.4                         | 2                                 | 169                                 |
| 584    | 2004 | 1     | 8   | 5:45  | -0.5                            | -2.5        | -1.5        | 61.4                     | 20                      | 80.8                 | 12.4                                  | 16.2                        | 2                                 | 185                                 |
| 585    | 2004 | 1     | 8   | 13:42 | -0.5                            | -2.5        | -1.5        | 42.1                     | 15                      | 73.9                 | 13.5                                  | 11.1                        | 2                                 | 185                                 |
| 586    | 2004 | 1     | 13  | 5:45  | 2.5                             | -0.5        | 1.0         | 32.1                     | 8                       | 105.6                | 9.5                                   | 8.4                         | 3                                 | 173                                 |
| 587    | 2004 | 1     | 18  | 6:05  | -0.5                            | -2.0        | -1.3        | 23.2                     | 8                       | 76.3                 | 13.1                                  | 6.1                         | 3                                 | 161                                 |
| 588    | 2004 | 1     | 19  | 6:05  | 0.5                             | -2.0        | -0.8        | 31.4                     | 11                      | 75.1                 | 13.3                                  | 8.3                         | 2                                 | 169                                 |
| 589    | 2004 | 1     | 28  | 5:45  | -1.5                            | -3.5        | -2.5        | 41.0                     | 13                      | 83.0                 | 12.0                                  | 10.8                        | 2                                 | 191                                 |
| 590    | 2004 | 1     | 29  | 5:40  | -0.5                            | -4.0        | -2.3        | 41.3                     | 10                      | 108.7                | 9.2                                   | 10.9                        | 2                                 | 185                                 |
| 591    | 2004 | 1     | 30  | 5:30  | -0.5                            | -3.0        | -1.8        | 139.0                    | 45                      | 81.3                 | 12.3                                  | 36.6                        | 3                                 | 229                                 |
| 592    | 2004 | 2     | 6   | 5:45  | -2.0                            | -3.0        | -2.5        | 55.0                     | 15                      | 96.5                 | 10.4                                  | 14.5                        | 3                                 | 215                                 |
| 593    | 2004 | 2     | 6   | 13:55 | -1.5                            | -3.0        | -2.3        | 30.0                     | 11                      | 71.8                 | 13.9                                  | 7.9                         | 3                                 | 224                                 |
| 594    | 2004 | 2     | 15  | 6:15  | 0.0                             | -4.0        | -2.0        | 15.5                     | 9                       | 45.3                 | 22.1                                  | 4.1                         | 3                                 | 209                                 |

| Sample | Year | Month | Day | Time  | Sample Interval<br>Temperatures |             |             | Snow<br>Sample<br>Weight | Snow<br>Sample<br>Depth | Snow<br>Density      | Snow<br>Depth<br>to<br>Water<br>Depth | Snow<br>Water<br>Equivalent | Air<br>Flow<br>Type               | Depth<br>of<br>Snow<br>on<br>Ground |
|--------|------|-------|-----|-------|---------------------------------|-------------|-------------|--------------------------|-------------------------|----------------------|---------------------------------------|-----------------------------|-----------------------------------|-------------------------------------|
|        |      |       |     |       | Max<br>(LST)                    | Min<br>(°C) | Avg<br>(°C) | (g)                      | (cm)                    | (kg/m <sup>3</sup> ) | Ratio                                 | (mm H <sub>2</sub> O)       | Inflow =1<br>Outflow=2<br>Other=3 | (cm)                                |
| 595    | 2004 | 2     | 16  | 13:40 | -0.5                            | -5.5        | -3.0        | 15.0                     | 5                       | 78.9                 | 12.7                                  | 3.9                         | 2                                 | 210                                 |
| 596    | 2004 | 2     | 17  | 5:40  | 1.5                             | -4.0        | -1.3        | 66.0                     | 20                      | 86.8                 | 11.5                                  | 17.4                        | 3                                 | 227                                 |
| 597    | 2004 | 2     | 18  | 5:40  | -1.0                            | -4.0        | -2.5        | 39.8                     | 12                      | 87.2                 | 11.5                                  | 10.5                        | 3                                 | 230                                 |
| 598    | 2004 | 3     | 5   | 6:10  | -1.5                            | -5.5        | -3.5        | 18.0                     | 7                       | 67.7                 | 14.8                                  | 4.7                         | 1                                 | 222                                 |
| 599    | 2004 | 3     | 5   | 14:00 | -3.5                            | -6.0        | -4.8        | 19.0                     | 7                       | 71.4                 | 14.0                                  | 5.0                         | 1                                 | 230                                 |
| 600    | 2004 | 3     | 7   | 5:45  | -1.0                            | -5.0        | -3.0        | 63.7                     | 20                      | 83.8                 | 11.9                                  | 16.8                        | 3                                 | 246                                 |
| 601    | 2004 | 3     | 7   | 13:40 | 2.0                             | -0.5        | 0.8         | 46.5                     | 8                       | 153.0                | 6.5                                   | 12.2                        | 3                                 | 247                                 |
| 602    | 2004 | 3     | 18  | 5:45  | -0.5                            | -2.5        | -1.5        | 76.0                     | 18                      | 111.1                | 9.0                                   | 20.0                        | 1                                 | 230                                 |
| 603    | 2004 | 3     | 24  | 6:15  | 2.5                             | -1.5        | 0.5         | 34.0                     | 12                      | 74.6                 | 13.4                                  | 8.9                         | 3                                 | 223                                 |
| 604    | 2004 | 3     | 24  | 14:55 | -0.5                            | -3.0        | -1.8        | 41.8                     | 15                      | 73.2                 | 13.7                                  | 11.0                        | 3                                 | 237                                 |
| 605    | 2004 | 3     | 25  | 5:40  | -1.5                            | -5.0        | -3.3        | 36.0                     | 11                      | 86.1                 | 11.6                                  | 9.5                         | 3                                 | 245                                 |
| 606    | 2004 | 3     | 25  | 13:45 | -1.5                            | -5.0        | -3.3        | 73.0                     | 21                      | 91.5                 | 10.9                                  | 19.2                        | 3                                 | 245                                 |
| 607    | 2004 | 3     | 26  | 5:45  | -0.5                            | -4.5        | -2.5        | 23.0                     | 7                       | 86.5                 | 11.6                                  | 6.1                         | 1                                 | 247                                 |
| 608    | 2004 | 3     | 26  | 13:45 | -0.5                            | -4.5        | -2.5        | 32.5                     | 9                       | 95.0                 | 10.5                                  | 8.6                         | 1                                 | 247                                 |
| 609    | 2004 | 3     | 27  | 5:45  | -1.0                            | -4.0        | -2.5        | 33.0                     | 9                       | 96.5                 | 10.4                                  | 8.7                         | 1                                 | 255                                 |
| 610    | 2004 | 3     | 27  | 14:10 | -1.0                            | -4.0        | -2.5        | 34.0                     | 10                      | 89.5                 | 11.2                                  | 8.9                         | 1                                 | 255                                 |
| 611    | 2004 | 3     | 30  | 5:45  | 10.0                            | 0.0         | 5.0         | 41.7                     | 5                       | 219.5                | 4.6                                   | 11.0                        | 1                                 | 236                                 |
| 612    | 2004 | 3     | 30  | 13:50 | 1.0                             | -1.0        | 0.0         | 44.5                     | 11                      | 106.5                | 9.4                                   | 11.7                        | 1                                 | 244                                 |
| 613    | 2004 | 4     | 20  | 6:15  | 2.0                             | -2.0        | 0.0         | 16.0                     | 7                       | 60.2                 | 16.6                                  | 4.2                         | 3                                 | 214                                 |
| 614    | 2004 | 11    | 30  | 6:30  | -6.0                            | -10.0       | -8.0        | 19.5                     | 8                       | 64.1                 | 15.6                                  | 5.1                         | 2                                 | 79                                  |
| 615    | 2004 | 12    | 4   | 6:00  | -0.5                            | -4.0        | -2.3        | 54.0                     | 14                      | 101.5                | 9.9                                   | 14.2                        | 3                                 | 88                                  |
| 616    | 2004 | 12    | 4   | 14:05 | -2.0                            | -3.5        | -2.8        | 29.3                     | 11                      | 70.1                 | 14.3                                  | 7.7                         | 3                                 | 100                                 |
| 617    | 2004 | 12    | 5   | 5:50  | -1.5                            | -7.0        | -4.3        | 63.0                     | 22                      | 75.4                 | 13.3                                  | 16.6                        | 3                                 | 118                                 |
| 618    | 2004 | 12    | 8   | 6:20  | -3.0                            | -6.5        | -4.8        | 32.0                     | 12                      | 70.2                 | 14.3                                  | 8.4                         | 3                                 | 121                                 |
| 619    | 2004 | 12    | 9   | 6:00  | -3.0                            | -4.0        | -3.5        | 36.0                     | 9                       | 105.3                | 9.5                                   | 9.5                         | 1                                 | 123                                 |
| 620    | 2004 | 12    | 14  | 5:50  | 2.0                             | -0.5        | 0.8         | 63.5                     | 16                      | 104.4                | 9.6                                   | 16.7                        | 3                                 | 123                                 |
| 621    | 2004 | 12    | 26  | 5:40  | -2.0                            | -4.0        | -3.0        | 35.5                     | 12                      | 77.9                 | 12.8                                  | 9.3                         | 3                                 | 122                                 |
| 622    | 2004 | 12    | 26  | 13:30 | -2.0                            | -4.0        | -3.0        | 51.3                     | 18                      | 74.9                 | 13.3                                  | 13.5                        | 3                                 | 122                                 |
| 623    | 2004 | 12    | 30  | 6:15  | -0.5                            | -4.5        | -2.5        | 23.1                     | 7                       | 86.7                 | 11.5                                  | 6.1                         | 3                                 | 122                                 |
| 624    | 2005 | 2     | 4   | 6:15  | 3.0                             | -2.5        | 0.3         | 55.0                     | 27                      | 53.6                 | 18.7                                  | 14.5                        | 3                                 | 150                                 |
| 625    | 2005 | 2     | 13  | 6:10  | -2.0                            | -8.0        | -5.0        | 13.8                     | 6                       | 60.4                 | 16.6                                  | 3.6                         | 1                                 | 143                                 |
| 626    | 2005 | 3     | 1   | 6:10  | 2.0                             | -2.0        | 0.0         | 17.5                     | 6                       | 76.8                 | 13.0                                  | 4.6                         | 3                                 | 139                                 |
| 627    | 2005 | 3     | 16  | 14:30 | -1.5                            | -4.0        | -2.8        | 44.8                     | 13                      | 90.7                 | 11.0                                  | 11.8                        | 3                                 | 138                                 |
| 628    | 2005 | 3     | 17  | 6:00  | -2.0                            | -8.0        | -5.0        | 28.5                     | 11                      | 68.2                 | 14.7                                  | 7.5                         | 2                                 | 135                                 |
| 629    | 2005 | 3     | 19  | 6:15  | -2.5                            | -7.5        | -5.0        | 24.0                     | 15                      | 42.1                 | 23.8                                  | 6.3                         | 3                                 | 148                                 |
| 630    | 2005 | 3     | 20  | 5:45  | 0.5                             | -5.0        | -2.3        | 109.5                    | 31                      | 93.0                 | 10.8                                  | 28.8                        | 3                                 | 172                                 |
| 631    | 2005 | 3     | 20  | 13:30 | 0.0                             | -2.5        | -1.3        | 51.1                     | 17                      | 79.1                 | 12.6                                  | 13.4                        | 3                                 | 184                                 |
| 632    | 2005 | 3     | 21  | 5:45  | 0.0                             | -8.0        | -4.0        | 69.0                     | 18                      | 100.9                | 9.9                                   | 18.2                        | 3                                 | 192                                 |
| 633    | 2005 | 3     | 26  | 5:45  | -1.5                            | -4.0        | -2.8        | 35.2                     | 10                      | 92.6                 | 10.8                                  | 9.3                         | 3                                 | 180                                 |
| 634    | 2005 | 3     | 26  | 14:02 | 1.0                             | -3.0        | -1.0        | 45.0                     | 19                      | 62.3                 | 16.0                                  | 11.8                        | 3                                 | 198                                 |

| Sample | Year | Month | Day | Time  | Sample Interval<br>Temperatures |             |             | Snow<br>Sample<br>Weight | Snow<br>Sample<br>Depth | Snow<br>Density      | Snow<br>Depth<br>to<br>Water<br>Depth | Snow<br>Water<br>Equivalent | Air<br>Flow<br>Type               | Depth<br>of<br>Snow<br>on<br>Ground |
|--------|------|-------|-----|-------|---------------------------------|-------------|-------------|--------------------------|-------------------------|----------------------|---------------------------------------|-----------------------------|-----------------------------------|-------------------------------------|
|        |      |       |     |       | Max<br>(LST)                    | Min<br>(°C) | Avg<br>(°C) | (g)                      | (cm)                    | (kg/m <sup>3</sup> ) | Ratio                                 | (mm H <sub>2</sub> O)       | Inflow =1<br>Outflow=2<br>Other=3 | (cm)                                |
| 635    | 2005 | 3     | 28  | 6:10  | 1.0                             | -4.0        | -1.5        | 18.9                     | 5                       | 99.5                 | 10.1                                  | 5.0                         | 1                                 | 196                                 |
| 636    | 2005 | 4     | 1   | 5:40  | -0.5                            | -3.0        | -1.8        | 161.3                    | 50                      | 84.9                 | 11.8                                  | 42.4                        | 1                                 | 233                                 |
| 637    | 2005 | 4     | 1   | 13:55 | -1.0                            | -5.0        | -3.0        | 30.0                     | 8                       | 98.7                 | 10.1                                  | 7.9                         | 1                                 | 230                                 |
| 638    | 2005 | 4     | 3   | 6:00  | -1.5                            | -3.5        | -2.5        | 37.0                     | 11                      | 88.5                 | 11.3                                  | 9.7                         | 3                                 | 232                                 |
| 639    | 2005 | 4     | 3   | 14:00 | -2.0                            | -3.0        | -2.5        | 37.0                     | 13                      | 74.9                 | 13.4                                  | 9.7                         | 1                                 | 241                                 |
| 640    | 2005 | 4     | 4   | 5:45  | -0.5                            | -5.5        | -3.0        | 29.0                     | 12                      | 63.6                 | 15.7                                  | 7.6                         | 3                                 | 245                                 |
| 641    | 2005 | 4     | 6   | 5:30  | -1.0                            | -2.5        | -1.8        | 70.5                     | 16                      | 116.0                | 8.6                                   | 18.6                        | 3                                 | 250                                 |
| 642    | 2005 | 4     | 6   | 14:30 | -1.0                            | -2.5        | -1.8        | 102.0                    | 20                      | 134.2                | 7.5                                   | 26.8                        | 3                                 | 250                                 |
| 643    | 2005 | 4     | 11  | 5:50  | 0.0                             | -2.0        | -1.0        | 53.0                     | 16                      | 87.2                 | 11.5                                  | 13.9                        | 3                                 | 245                                 |
| 644    | 2005 | 4     | 15  | 6:25  | -1.5                            | -5.5        | -3.5        | 14.4                     | 5                       | 75.8                 | 13.2                                  | 3.8                         | 3                                 | 237                                 |
| 645    | 2005 | 4     | 16  | 6:00  | 2.0                             | -0.5        | 0.8         | 69.0                     | 21                      | 86.5                 | 11.6                                  | 18.2                        | 1                                 | 255                                 |
| 646    | 2005 | 4     | 16  | 13:45 | 1.0                             | -1.5        | -0.3        | 50.2                     | 13                      | 101.6                | 9.8                                   | 13.2                        | 1                                 | 265                                 |
| 647    | 2005 | 5     | 22  | 6:50  | 5.0                             | -1.5        | 1.8         | 66.0                     | 19                      | 91.4                 | 10.9                                  | 17.4                        | 3                                 | 145                                 |
| 648    | 2005 | 11    | 29  | 6:30  | -8.0                            | -12.0       | -10.0       | 25.5                     | 6                       | 111.8                | 8.9                                   | 6.7                         | 3                                 | 77                                  |
| 649    | 2005 | 12    | 22  | 13:40 | 1.0                             | 0.0         | 0.5         | 48.0                     | 10                      | 126.3                | 7.9                                   | 12.6                        | 3                                 | 87                                  |
| 650    | 2005 | 12    | 23  | 5:50  | 1.5                             | -1.0        | 0.3         | 33.8                     | 8                       | 111.2                | 9.0                                   | 8.9                         | 3                                 | 90                                  |
| 651    | 2005 | 12    | 23  | 13:45 | 1.5                             | -1.0        | 0.3         | 74.0                     | 16                      | 121.7                | 8.2                                   | 19.5                        | 3                                 | 90                                  |
| 652    | 2005 | 12    | 24  | 5:45  | 3.0                             | -1.5        | 0.8         | 42.8                     | 5                       | 225.3                | 4.4                                   | 11.3                        | 3                                 | 90                                  |
| 653    | 2005 | 12    | 27  | 6:45  | 0.5                             | -3.0        | -1.3        | 34.3                     | 11                      | 82.1                 | 12.2                                  | 9.0                         | 3                                 | 96                                  |
| 654    | 2005 | 12    | 28  | 14:15 | -0.5                            | -4.0        | -2.3        | 49.8                     | 16                      | 81.9                 | 12.2                                  | 13.1                        | 3                                 | 108                                 |
| 655    | 2005 | 12    | 29  | 5:40  | 0.0                             | -4.5        | -2.3        | 56.0                     | 19                      | 77.6                 | 12.9                                  | 14.7                        | 3                                 | 108                                 |
| 656    | 2005 | 12    | 30  | 5:40  | -1.5                            | -4.0        | -2.8        | 34.0                     | 12                      | 74.6                 | 13.4                                  | 8.9                         | 3                                 | 115                                 |
| 657    | 2005 | 12    | 31  | 5:40  | 0.0                             | -4.0        | -2.0        | 24.0                     | 9                       | 70.2                 | 14.3                                  | 6.3                         | 3                                 | 120                                 |
| 658    | 2005 | 12    | 31  | 13:55 | 0.0                             | -4.0        | -2.0        | 27.6                     | 9                       | 80.7                 | 12.4                                  | 7.3                         | 3                                 | 126                                 |
| 659    | 2006 | 1     | 1   | 5:35  | 0.0                             | -5.0        | -2.5        | 44.0                     | 14                      | 82.7                 | 12.1                                  | 11.6                        | 3                                 | 135                                 |
| 660    | 2006 | 1     | 2   | 5:40  | -1.5                            | -3.5        | -2.5        | 99.0                     | 30                      | 86.8                 | 11.5                                  | 26.1                        | 3                                 | 155                                 |
| 661    | 2006 | 1     | 4   | 5:40  | -3.0                            | -4.5        | -3.8        | 31.0                     | 12                      | 68.0                 | 14.7                                  | 8.2                         | 3                                 | 152                                 |
| 662    | 2006 | 1     | 5   | 5:40  | 0.5                             | -4.0        | -1.8        | 112.0                    | 26                      | 113.4                | 8.8                                   | 29.5                        | 3                                 | 171                                 |
| 663    | 2006 | 1     | 5   | 14:55 | 1.0                             | 0.0         | 0.5         | 65.5                     | 10                      | 172.2                | 5.8                                   | 17.2                        | 3                                 | 172                                 |
| 664    | 2006 | 1     | 6   | 5:45  | 1.5                             | -2.0        | -0.3        | 51.8                     | 8                       | 170.4                | 5.9                                   | 13.6                        | 3                                 | 172                                 |
| 665    | 2006 | 1     | 6   | 13:45 | 1.5                             | -2.0        | -0.3        | 100.0                    | 17                      | 154.8                | 6.5                                   | 26.3                        | 3                                 | 172                                 |
| 666    | 2006 | 1     | 9   | 5:40  | -3.0                            | -4.0        | -3.5        | 100.5                    | 34                      | 77.8                 | 12.9                                  | 26.4                        | 1                                 | 196                                 |
| 667    | 2006 | 1     | 9   | 14:30 | -1.5                            | -2.5        | -2.0        | 42.0                     | 15                      | 73.7                 | 13.6                                  | 11.1                        | 1                                 | 203                                 |
| 668    | 2006 | 1     | 10  | 5:40  | -1.0                            | -4.5        | -2.8        | 34.0                     | 11                      | 81.3                 | 12.3                                  | 8.9                         | 3                                 | 203                                 |
| 669    | 2006 | 1     | 10  | 14:05 | -2.0                            | -4.0        | -3.0        | 15.3                     | 5                       | 80.5                 | 12.4                                  | 4.0                         | 3                                 | 205                                 |
| 670    | 2006 | 1     | 11  | 5:45  | -2.5                            | -5.0        | -3.8        | 26.0                     | 10                      | 68.4                 | 14.6                                  | 6.8                         | 1                                 | 205                                 |
| 671    | 2006 | 1     | 13  | 5:40  | -1.0                            | -4.0        | -2.5        | 98.0                     | 31                      | 83.2                 | 12.0                                  | 25.8                        | 3                                 | 223                                 |
| 672    | 2006 | 1     | 13  | 13:48 | -1.0                            | -2.5        | -1.8        | 77.0                     | 27                      | 75.0                 | 13.3                                  | 20.3                        | 3                                 | 241                                 |
| 673    | 2006 | 1     | 14  | 5:40  | -1.5                            | -4.0        | -2.8        | 104.0                    | 30                      | 91.2                 | 11.0                                  | 27.4                        | 3                                 | 255                                 |
| 674    | 2006 | 1     | 17  | 5:45  | -0.5                            | -2.5        | -1.5        | 95.3                     | 22                      | 113.9                | 8.8                                   | 25.1                        | 1                                 | 240                                 |

| Sample | Year | Month | Day | Time  | Sample Interval<br>Temperatures |             |             | Snow<br>Sample<br>Weight | Snow<br>Sample<br>Depth | Snow<br>Density      | Snow<br>Depth<br>to<br>Water<br>Depth | Snow<br>Water<br>Equivalent | Air<br>Flow<br>Type<br>Inflow =1<br>Outflow=2<br>Other=3 | Depth<br>of<br>Snow<br>on<br>Ground |
|--------|------|-------|-----|-------|---------------------------------|-------------|-------------|--------------------------|-------------------------|----------------------|---------------------------------------|-----------------------------|----------------------------------------------------------|-------------------------------------|
|        |      |       |     |       | Max<br>(LST)                    | Min<br>(°C) | Avg<br>(°C) | (g)                      | (cm)                    | (kg/m <sup>3</sup> ) | Ratio                                 | (mm H <sub>2</sub> O)       |                                                          | (cm)                                |
| 675    | 2006 | 1     | 20  | 5:50  | -4.5                            | -6.0        | -5.3        | 36.6                     | 13                      | 74.0                 | 13.5                                  | 9.6                         | 3                                                        | 234                                 |
| 676    | 2006 | 1     | 27  | 7:00  | -4.0                            | -9.0        | -6.5        | 38.8                     | 13                      | 78.5                 | 12.7                                  | 10.2                        | 1                                                        | 231                                 |
| 677    | 2006 | 1     | 27  | 13:50 | -4.0                            | -9.0        | -6.5        | 50.8                     | 17                      | 78.6                 | 12.7                                  | 13.4                        | 1                                                        | 231                                 |
| 678    | 2006 | 1     | 28  | 5:45  | -4.0                            | -6.5        | -5.3        | 57.0                     | 27                      | 55.6                 | 18.0                                  | 15.0                        | 1                                                        | 250                                 |
| 679    | 2006 | 1     | 28  | 13:30 | -4.0                            | -6.0        | -5.0        | 16.0                     | 7                       | 60.2                 | 16.6                                  | 4.2                         | 1                                                        | 250                                 |
| 680    | 2006 | 1     | 30  | 5:45  | -1.0                            | -6.5        | -3.8        | 98.0                     | 40                      | 64.4                 | 15.5                                  | 25.8                        | 1                                                        | 274                                 |
| 681    | 2006 | 2     | 1   | 5:45  | -3.0                            | -5.5        | -4.3        | 40.5                     | 16                      | 66.6                 | 15.0                                  | 10.7                        | 1                                                        | 271                                 |
| 682    | 2006 | 2     | 2   | 5:45  | -2.0                            | -4.0        | -3.0        | 45.0                     | 12                      | 98.7                 | 10.1                                  | 11.8                        | 3                                                        | 272                                 |
| 683    | 2006 | 2     | 4   | 5:45  | 0.5                             | -5.5        | -2.5        | 97.2                     | 19                      | 134.6                | 7.4                                   | 25.6                        | 3                                                        | 278                                 |
| 684    | 2006 | 2     | 4   | 13:45 | 0.0                             | -3.5        | -1.8        | 18.9                     | 5                       | 99.5                 | 10.1                                  | 5.0                         | 3                                                        | 282                                 |
| 685    | 2006 | 2     | 26  | 5:45  | -3.0                            | -11.5       | -7.3        | 67.7                     | 23                      | 77.5                 | 12.9                                  | 17.8                        | 2                                                        | 253                                 |
| 686    | 2006 | 2     | 26  | 14:20 | -0.5                            | -3.0        | -1.8        | 32.0                     | 10                      | 84.2                 | 11.9                                  | 8.4                         | 2                                                        | 259                                 |
| 687    | 2006 | 2     | 28  | 5:45  | 0.0                             | -6.0        | -3.0        | 43.8                     | 6                       | 192.1                | 5.2                                   | 11.5                        | 3                                                        | 267                                 |
| 688    | 2006 | 3     | 3   | 5:45  | -2.5                            | -9.0        | -5.8        | 26.0                     | 11                      | 62.2                 | 16.1                                  | 6.8                         | 2                                                        | 270                                 |
| 689    | 2006 | 3     | 5   | 14:00 | -2.5                            | -7.5        | -5.0        | 12.0                     | 7                       | 45.1                 | 22.2                                  | 3.2                         | 2                                                        | 268                                 |
| 690    | 2006 | 3     | 6   | 5:55  | -2.0                            | -5.0        | -3.5        | 29.6                     | 15                      | 51.9                 | 19.3                                  | 7.8                         | 3                                                        | 274                                 |
| 691    | 2006 | 3     | 6   | 13:45 | -1.5                            | -3.0        | -2.3        | 46.8                     | 17                      | 72.4                 | 13.8                                  | 12.3                        | 3                                                        | 285                                 |
| 692    | 2006 | 3     | 7   | 5:50  | -1.0                            | -4.0        | -2.5        | 138.5                    | 40                      | 91.1                 | 11.0                                  | 36.4                        | 1                                                        | 300                                 |
| 693    | 2006 | 3     | 8   | 14:30 | -4.0                            | -5.5        | -4.8        | 45.5                     | 13                      | 92.1                 | 10.9                                  | 12.0                        | 1                                                        | 301                                 |
| 694    | 2006 | 3     | 9   | 5:40  | -4.5                            | -11.5       | -8.0        | 16.0                     | 6                       | 70.2                 | 14.3                                  | 4.2                         | 1                                                        | 303                                 |
| 695    | 2006 | 3     | 14  | 13:50 | -2.5                            | -6.0        | -4.3        | 24.0                     | 7                       | 90.2                 | 11.1                                  | 6.3                         | 3                                                        | 289                                 |
| 696    | 2006 | 3     | 16  | 5:40  | -3.0                            | -7.5        | -5.3        | 26.0                     | 9                       | 76.0                 | 13.2                                  | 6.8                         | 3                                                        | 293                                 |
| 697    | 2006 | 3     | 22  | 5:40  | -0.5                            | -3.5        | -2.0        | 48.5                     | 18                      | 70.9                 | 14.1                                  | 12.8                        | 1                                                        | 300                                 |
| 698    | 2006 | 3     | 22  | 14:00 | -1.5                            | -3.0        | -2.3        | 50.5                     | 19                      | 69.9                 | 14.3                                  | 13.3                        | 1                                                        | 309                                 |
| 699    | 2006 | 3     | 23  | 5:40  | 0.0                             | -2.0        | -1.0        | 38.0                     | 10                      | 100.0                | 10.0                                  | 10.0                        | 3                                                        | 312                                 |
| 700    | 2006 | 3     | 24  | 5:45  | 3.5                             | -1.5        | 1.0         | 28.5                     | 10                      | 75.0                 | 13.3                                  | 7.5                         | 3                                                        | 309                                 |
| 701    | 2006 | 3     | 24  | 13:55 | 0.0                             | -2.5        | -1.3        | 31.0                     | 8                       | 102.0                | 9.8                                   | 8.2                         | 3                                                        | 314                                 |
| 702    | 2006 | 3     | 25  | 5:45  | -1.5                            | -8.5        | -5.0        | 61.0                     | 16                      | 100.3                | 10.0                                  | 16.1                        | 3                                                        | 326                                 |
| 703    | 2006 | 4     | 1   | 5:50  | -2.0                            | -3.5        | -2.8        | 57.0                     | 17                      | 88.2                 | 11.3                                  | 15.0                        | 1                                                        | 292                                 |
| 704    | 2006 | 4     | 13  | 5:50  | -2.0                            | -3.5        | -2.8        | 69.0                     | 14                      | 129.7                | 7.7                                   | 18.2                        | 1                                                        | 292                                 |
| 705    | 2006 | 4     | 14  | 13:45 | -2.0                            | -5.0        | -3.5        | 57.0                     | 16                      | 93.8                 | 10.7                                  | 15.0                        | 1                                                        | 305                                 |
| 706    | 2006 | 4     | 15  | 5:45  | -3.0                            | -8.5        | -5.8        | 39.2                     | 12                      | 86.0                 | 11.6                                  | 10.3                        | 1                                                        | 312                                 |
| 707    | 2006 | 4     | 16  | 5:45  | -1.5                            | -7.5        | -4.5        | 27.7                     | 9                       | 80.8                 | 12.4                                  | 7.3                         | 1                                                        | 315                                 |
| 708    | 2006 | 4     | 20  | 6:00  | 1.0                             | 0.0         | 0.5         | 66.0                     | 13                      | 133.6                | 7.5                                   | 17.4                        | 1                                                        | 308                                 |
| 709    | 2006 | 11    | 19  | 14:10 | 1.5                             | -1.0        | 0.3         | 163.5                    | 14                      | 307.3                | 3.3                                   | 43.0                        | 1                                                        | 128                                 |
| 710    | 2006 | 11    | 20  | 6:30  | -0.5                            | -6.0        | -3.3        | 42.0                     | 16                      | 69.1                 | 14.5                                  | 11.1                        | 3                                                        | 137                                 |
| 711    | 2006 | 11    | 20  | 13:45 | -3.0                            | -6.0        | -4.5        | 21.0                     | 9                       | 61.4                 | 16.3                                  | 5.5                         | 3                                                        | 144                                 |
| 712    | 2006 | 11    | 21  | 6:00  | -2.0                            | -5.0        | -3.5        | 59.5                     | 23                      | 68.1                 | 14.7                                  | 15.7                        | 3                                                        | 153                                 |
| 713    | 2006 | 11    | 21  | 14:00 | -2.5                            | -5.5        | -4.0        | 23.7                     | 20                      | 31.2                 | 32.1                                  | 6.2                         | 3                                                        | 162                                 |
| 714    | 2006 | 11    | 22  | 6:00  | -3.0                            | -6.5        | -4.8        | 33.1                     | 11                      | 79.2                 | 12.6                                  | 8.7                         | 3                                                        | 163                                 |

| Sample | Year | Month | Day | Time  | Sample Interval<br>Temperatures |             |             | Snow<br>Sample<br>Weight | Snow<br>Sample<br>Depth | Snow<br>Density      | Snow<br>Depth<br>to<br>Water<br>Depth | Snow<br>Water<br>Equivalent | Air<br>Flow<br>Type               | Depth<br>of<br>Snow<br>on<br>Ground |
|--------|------|-------|-----|-------|---------------------------------|-------------|-------------|--------------------------|-------------------------|----------------------|---------------------------------------|-----------------------------|-----------------------------------|-------------------------------------|
|        |      |       |     |       | Max<br>(LST)                    | Min<br>(°C) | Avg<br>(°C) | (g)                      | (cm)                    | (kg/m <sup>3</sup> ) | Ratio                                 | (mm H <sub>2</sub> O)       | Inflow =1<br>Outflow=2<br>Other=3 | (cm)                                |
| 715    | 2006 | 11    | 23  | 6:30  | -4.0                            | -5.5        | -4.8        | 55.0                     | 15                      | 96.5                 | 10.4                                  | 14.5                        | 1                                 | 166                                 |
| 716    | 2006 | 11    | 24  | 5:45  | -5.5                            | -9.5        | -7.5        | 30.0                     | 10                      | 78.9                 | 12.7                                  | 7.9                         | 1                                 | 168                                 |
| 717    | 2006 | 11    | 26  | 5:50  | -9.0                            | -13.5       | -11.3       | 33.0                     | 12                      | 72.4                 | 13.8                                  | 8.7                         | 2                                 | 166                                 |
| 718    | 2006 | 11    | 26  | 13:55 | -12.0                           | -15.5       | -13.8       | 23.0                     | 11                      | 55.0                 | 18.2                                  | 6.1                         | 2                                 | 173                                 |
| 719    | 2006 | 12    | 4   | 5:50  | 1.5                             | -2.5        | -0.5        | 55.0                     | 9                       | 160.8                | 6.2                                   | 14.5                        | 3                                 | 160                                 |
| 720    | 2006 | 12    | 5   | 5:45  | -1.0                            | -6.0        | -3.5        | 40.8                     | 11                      | 97.5                 | 10.3                                  | 10.7                        | 3                                 | 164                                 |
| 721    | 2006 | 12    | 8   | 6:15  | 2.5                             | -0.5        | 1.0         | 28.0                     | 8                       | 92.1                 | 10.9                                  | 7.4                         | 2                                 | 160                                 |
| 722    | 2006 | 12    | 11  | 5:45  | 1.0                             | -3.0        | -1.0        | 40.0                     | 13                      | 81.0                 | 12.4                                  | 10.5                        | 1                                 | 168                                 |
| 723    | 2006 | 12    | 11  | 13:45 | 0.0                             | -2.5        | -1.3        | 67.0                     | 23                      | 76.7                 | 13.0                                  | 17.6                        | 1                                 | 188                                 |
| 724    | 2006 | 12    | 12  | 5:45  | -1.0                            | -5.0        | -3.0        | 127.3                    | 28                      | 119.6                | 8.4                                   | 33.5                        | 1                                 | 188                                 |
| 725    | 2006 | 12    | 13  | 5:45  | -1.0                            | -6.0        | -3.5        | 45.3                     | 13                      | 91.7                 | 10.9                                  | 11.9                        | 1                                 | 192                                 |
| 726    | 2006 | 12    | 13  | 14:00 | -3.0                            | -1.0        | -2.0        | 56.4                     | 13                      | 114.2                | 8.8                                   | 14.8                        | 1                                 | 199                                 |
| 727    | 2006 | 12    | 14  | 14:15 | -7.0                            | -9.0        | -8.0        | 30.3                     | 8                       | 99.7                 | 10.0                                  | 8.0                         | 3                                 | 199                                 |
| 728    | 2006 | 12    | 15  | 5:45  | -1.5                            | -8.5        | -5.0        | 166.0                    | 46                      | 95.0                 | 10.5                                  | 43.7                        | 1                                 | 240                                 |
| 729    | 2006 | 12    | 16  | 5:45  | -8.0                            | -12.0       | -10.0       | 133.5                    | 40                      | 87.8                 | 11.4                                  | 35.1                        | 3                                 | 229                                 |
| 730    | 2006 | 12    | 19  | 5:45  | -1.5                            | -5.5        | -3.5        | 47.2                     | 12                      | 103.5                | 9.7                                   | 12.4                        | 3                                 | 220                                 |
| 731    | 2006 | 12    | 20  | 6:15  | 0.0                             | -5.5        | -2.8        | 23.5                     | 5                       | 123.7                | 8.1                                   | 6.2                         | 3                                 | 219                                 |
| 732    | 2006 | 12    | 21  | 5:45  | 0.0                             | -3.0        | -1.5        | 60.3                     | 18                      | 88.1                 | 11.4                                  | 15.9                        | 1                                 | 235                                 |
| 733    | 2006 | 12    | 21  | 5:45  | 0.0                             | -3.0        | -1.5        | 97.8                     | 22                      | 117.0                | 8.5                                   | 25.7                        | 1                                 | 235                                 |
| 734    | 2006 | 12    | 22  | 5:45  | -2.5                            | -8.5        | -5.5        | 15.0                     | 6                       | 65.8                 | 15.2                                  | 3.9                         | 3                                 | 236                                 |
| 735    | 2006 | 12    | 23  | 5:50  | -5.5                            | -8.0        | -6.8        | 24.5                     | 6                       | 107.5                | 9.3                                   | 6.4                         | 3                                 | 236                                 |
| 736    | 2006 | 12    | 25  | 5:40  | -1.0                            | -6.0        | -3.5        | 87.8                     | 29                      | 79.7                 | 12.6                                  | 23.1                        | 1                                 | 257                                 |
| 737    | 2006 | 12    | 26  | 5:50  | -3.5                            | -8.0        | -5.8        | 64.7                     | 20                      | 85.1                 | 11.7                                  | 17.0                        | 3                                 | 259                                 |
| 738    | 2007 | 1     | 2   | 5:45  | 0.5                             | -2.0        | -0.8        | 150.5                    | 55                      | 72.0                 | 13.9                                  | 39.6                        | 1                                 | 296                                 |
| 739    | 2007 | 1     | 2   | 13:55 | 1.0                             | -0.5        | 0.3         | 82.0                     | 15                      | 143.9                | 7.0                                   | 21.6                        | 1                                 | 302                                 |
| 740    | 2007 | 1     | 3   | 5:45  | 0.0                             | -3.5        | -1.8        | 31.8                     | 8                       | 104.4                | 9.6                                   | 8.4                         | 1                                 | 296                                 |
| 741    | 2007 | 1     | 6   | 5:40  | -3.0                            | -11.5       | -7.3        | 63.5                     | 24                      | 69.6                 | 14.4                                  | 16.7                        | 1                                 | 300                                 |
| 742    | 2007 | 1     | 7   | 6:10  | -3.0                            | -8.0        | -5.5        | 32.2                     | 23                      | 36.8                 | 27.1                                  | 8.5                         | 1                                 | 322                                 |
| 743    | 2007 | 1     | 9   | 5:45  | 0.0                             | -6.5        | -3.3        | 70.0                     | 16                      | 115.1                | 8.7                                   | 18.4                        | 1                                 | 308                                 |
| 744    | 2007 | 1     | 9   | 13:45 | 0.0                             | -3.5        | -1.8        | 21.4                     | 6                       | 93.9                 | 10.7                                  | 5.6                         | 1                                 | 312                                 |
| 745    | 2007 | 1     | 16  | 6:15  | -3.0                            | -9.0        | -6.0        | 29.3                     | 12                      | 64.3                 | 15.6                                  | 7.7                         | 3                                 | 288                                 |
| 746    | 2007 | 1     | 18  | 13:45 | -3.0                            | -6.5        | -4.8        | 17.1                     | 5                       | 89.7                 | 11.1                                  | 4.5                         | 3                                 | 286                                 |
| 747    | 2007 | 1     | 19  | 5:45  | -1.5                            | -6.0        | -3.8        | 36.5                     | 9                       | 106.7                | 9.4                                   | 9.6                         | 3                                 | 289                                 |
| 748    | 2007 | 1     | 22  | 13:35 | 0.5                             | -1.0        | -0.3        | 46.5                     | 16                      | 76.5                 | 13.1                                  | 12.2                        | 1                                 | 294                                 |
| 749    | 2007 | 1     | 23  | 5:45  | 0.5                             | -1.5        | -0.5        | 99.0                     | 29                      | 89.9                 | 11.1                                  | 26.1                        | 3                                 | 302                                 |
| 750    | 2007 | 2     | 12  | 5:45  | 0.0                             | -3.0        | -1.5        | 20.0                     | 10                      | 52.6                 | 19.0                                  | 5.3                         | 3                                 | 270                                 |
| 751    | 2007 | 2     | 15  | 5:50  | 0.0                             | -4.0        | -2.0        | 28.6                     | 7                       | 107.5                | 9.3                                   | 7.5                         | 1                                 | 267                                 |
| 752    | 2007 | 2     | 15  | 13:40 | 1.5                             | -1.5        | 0.0         | 38.5                     | 7                       | 144.7                | 6.9                                   | 10.1                        | 1                                 | 273                                 |
| 753    | 2007 | 2     | 18  | 5:45  | 1.0                             | -5.0        | -2.0        | 51.0                     | 13                      | 103.2                | 9.7                                   | 13.4                        | 1                                 | 276                                 |
| 754    | 2007 | 2     | 19  | 13:40 | -2.5                            | -5.0        | -3.8        | 24.5                     | 5                       | 128.9                | 7.8                                   | 6.4                         | 1                                 | 279                                 |

| Sample | Year | Month | Day | Time  | Sample Interval<br>Temperatures |             |             | Snow<br>Sample<br>Weight | Snow<br>Sample<br>Depth | Snow<br>Density      | Snow<br>Depth<br>to<br>Water<br>Depth | Snow<br>Water<br>Equivalent | Air<br>Flow<br>Type<br>Inflow =1<br>Outflow=2<br>Other=3 | Depth<br>of<br>Snow<br>on<br>Ground<br>(cm) |
|--------|------|-------|-----|-------|---------------------------------|-------------|-------------|--------------------------|-------------------------|----------------------|---------------------------------------|-----------------------------|----------------------------------------------------------|---------------------------------------------|
|        |      |       |     |       | Max<br>(LST)                    | Min<br>(°C) | Avg<br>(°C) | (g)                      | (cm)                    | (kg/m <sup>3</sup> ) | Ratio                                 | (mm H <sub>2</sub> O)       |                                                          |                                             |
| 755    | 2007 | 2     | 20  | 5:45  | -2.5                            | -7.0        | -4.8        | 25.5                     | 5                       | 134.2                | 7.5                                   | 6.7                         | 1                                                        | 283                                         |
| 756    | 2007 | 2     | 21  | 6:15  | -5.5                            | -7.5        | -6.5        | 17.1                     | 6                       | 75.0                 | 13.3                                  | 4.5                         | 3                                                        | 286                                         |
| 757    | 2007 | 2     | 23  | 13:35 | -5.0                            | -8.5        | -6.8        | 17.0                     | 9                       | 49.7                 | 20.1                                  | 4.5                         | 3                                                        | 294                                         |
| 758    | 2007 | 2     | 25  | 6:00  | -4.0                            | -7.0        | -5.5        | 36.5                     | 14                      | 68.6                 | 14.6                                  | 9.6                         | 3                                                        | 300                                         |
| 759    | 2007 | 3     | 7   | 5:45  | 4.5                             | 0.0         | 2.3         | 48.0                     | 11                      | 114.8                | 8.7                                   | 12.6                        | 1                                                        | 288                                         |
| 760    | 2007 | 3     | 7   | 13:40 | 1.0                             | -2.0        | -0.5        | 25.8                     | 7                       | 97.0                 | 10.3                                  | 6.8                         | 1                                                        | 290                                         |
| 761    | 2007 | 3     | 9   | 5:45  | 1.5                             | -4.0        | -1.3        | 46.0                     | 11                      | 110.0                | 9.1                                   | 12.1                        | 1                                                        | 304                                         |
| 762    | 2007 | 3     | 10  | 13:45 | 0.0                             | -2.0        | -1.0        | 33.0                     | 9                       | 96.5                 | 10.4                                  | 8.7                         | 1                                                        | 308                                         |
| 763    | 2007 | 3     | 11  | 5:45  | 2.0                             | -1.0        | 0.5         | 68.8                     | 11                      | 164.6                | 6.1                                   | 18.1                        | 3                                                        | 313                                         |
| 764    | 2007 | 3     | 11  | 13:40 | 2.0                             | 0.0         | 1.0         | 89.5                     | 7                       | 336.5                | 3.0                                   | 23.6                        | 3                                                        | 314                                         |
| 765    | 2007 | 3     | 14  | 5:45  | -4.5                            | -10.0       | -7.3        | 36.5                     | 13                      | 73.9                 | 13.5                                  | 9.6                         | 1                                                        | 313                                         |
| 766    | 2007 | 3     | 19  | 13:40 | 0.0                             | -1.0        | -0.5        | 57.0                     | 17                      | 88.2                 | 11.3                                  | 15.0                        | 1                                                        | 319                                         |
| 767    | 2007 | 3     | 20  | 5:20  | 0.0                             | -4.0        | -2.0        | 34.5                     | 10                      | 90.8                 | 11.0                                  | 9.1                         | 2                                                        | 321                                         |
| 768    | 2007 | 3     | 23  | 13:30 | 1.0                             | -1.0        | 0.0         | 46.0                     | 11                      | 110.0                | 9.1                                   | 12.1                        | 1                                                        | 326                                         |
| 769    | 2007 | 3     | 24  | 5:45  | 1.5                             | -0.5        | 0.5         | 65.3                     | 15                      | 114.6                | 8.7                                   | 17.2                        | 1                                                        | 333                                         |
| 770    | 2007 | 4     | 2   | 6:10  | -5.0                            | -12.0       | -8.5        | 22.5                     | 8                       | 74.0                 | 13.5                                  | 5.9                         | 3                                                        | 325                                         |
| 771    | 2007 | 4     | 9   | 6:10  | 6.0                             | -1.5        | 2.3         | 12.0                     | 5                       | 63.2                 | 15.8                                  | 3.2                         | 1                                                        | 294                                         |
| 772    | 2007 | 4     | 13  | 13:35 | 0.0                             | -4.5        | -2.3        | 33.0                     | 12                      | 72.4                 | 13.8                                  | 8.7                         | 1                                                        | 308                                         |
| 773    | 2007 | 4     | 14  | 5:45  | 0.0                             | -1.5        | -0.8        | 77.0                     | 23                      | 88.1                 | 11.4                                  | 20.3                        | 1                                                        | 325                                         |
| 774    | 2007 | 4     | 16  | 13:40 | -1.0                            | -4.0        | -2.5        | 26.8                     | 6                       | 117.3                | 8.5                                   | 7.0                         | 1                                                        | 323                                         |
| 775    | 2007 | 4     | 17  | 5:45  | -1.0                            | -6.5        | -3.8        | 18.0                     | 6                       | 78.9                 | 12.7                                  | 4.7                         | 1                                                        | 325                                         |
| 776    | 2007 | 11    | 18  | 6:05  | -1.5                            | -9.0        | -5.3        | 34.5                     | 9                       | 100.9                | 9.9                                   | 9.1                         | 3                                                        | 100                                         |
| 777    | 2007 | 11    | 27  | 5:55  | -4.0                            | -9.0        | -6.5        | 41.9                     | 14                      | 78.8                 | 12.7                                  | 11.0                        | 3                                                        | 104                                         |
| 778    | 2007 | 12    | 2   | 6:20  | -10.0                           | -18.5       | -14.3       | 34.0                     | 15                      | 59.6                 | 16.8                                  | 8.9                         | 2                                                        | 110                                         |
| 779    | 2007 | 12    | 2   | 13:50 | -8.0                            | -18.5       | -13.3       | 25.0                     | 7                       | 94.0                 | 10.6                                  | 6.6                         | 2                                                        | 115                                         |
| 780    | 2007 | 12    | 3   | 6:00  | 0.0                             | -10.0       | -5.0        | 153.0                    | 37                      | 108.8                | 9.2                                   | 40.3                        | 2                                                        | 145                                         |
| 781    | 2007 | 12    | 12  | 6:20  | 0.0                             | -10.0       | -5.0        | 21.5                     | 9                       | 62.9                 | 15.9                                  | 5.7                         | 3                                                        | 120                                         |
| 782    | 2007 | 12    | 15  | 5:45  | -2.5                            | -4.0        | -3.3        | 55.0                     | 22                      | 65.8                 | 15.2                                  | 14.5                        | 1                                                        | 140                                         |
| 783    | 2007 | 12    | 15  | 13:50 | -3.0                            | -4.5        | -3.8        | 24.5                     | 6                       | 107.5                | 9.3                                   | 6.4                         | 1                                                        | 142                                         |
| 784    | 2007 | 12    | 16  | 6:20  | -3.5                            | -5.0        | -4.3        | 17.0                     | 7                       | 63.9                 | 15.6                                  | 4.5                         | 3                                                        | 144                                         |
| 785    | 2007 | 12    | 17  | 5:35  | -3.5                            | -5.0        | -4.3        | 74.0                     | 25                      | 77.9                 | 12.8                                  | 19.5                        | 1                                                        | 162                                         |
| 786    | 2007 | 12    | 18  | 6:20  | -7.0                            | -9.5        | -8.3        | 21.0                     | 7                       | 78.9                 | 12.7                                  | 5.5                         | 3                                                        | 158                                         |
| 787    | 2007 | 12    | 19  | 6:10  | -2.5                            | -6.0        | -4.3        | 22.9                     | 7                       | 86.1                 | 11.6                                  | 6.0                         | 3                                                        | 158                                         |
| 788    | 2007 | 12    | 19  | 13:45 | -4.0                            | -6.0        | -5.0        | 32.6                     | 13                      | 66.0                 | 15.2                                  | 8.6                         | 3                                                        | 169                                         |
| 789    | 2007 | 12    | 22  | 5:45  | -5.5                            | -10.0       | -7.8        | 28.5                     | 7                       | 107.1                | 9.3                                   | 7.5                         | 3                                                        | 165                                         |
| 790    | 2007 | 12    | 22  | 13:55 | -3.5                            | -6.0        | -4.8        | 44.5                     | 11                      | 106.5                | 9.4                                   | 11.7                        | 3                                                        | 176                                         |
| 791    | 2007 | 12    | 23  | 13:40 | -2.5                            | -5.5        | -4.0        | 32.0                     | 10                      | 84.2                 | 11.9                                  | 8.4                         | 3                                                        | 180                                         |
| 792    | 2007 | 12    | 24  | 5:40  | -1.5                            | -7.5        | -4.5        | 24.0                     | 14                      | 45.1                 | 22.2                                  | 6.3                         | 1                                                        | 180                                         |
| 793    | 2007 | 12    | 26  | 5:55  | -7.0                            | -10.0       | -8.5        | 12.5                     | 5                       | 65.8                 | 15.2                                  | 3.3                         | 3                                                        | 176                                         |
| 794    | 2007 | 12    | 30  | 6:10  | -6.0                            | -8.5        | -7.3        | 32.5                     | 10                      | 85.5                 | 11.7                                  | 8.6                         | 1                                                        | 175                                         |

| Sample | Year | Month | Day | Time  | Sample Interval<br>Temperatures |             |             | Snow<br>Sample<br>Weight | Snow<br>Sample<br>Depth | Snow<br>Density      | Snow<br>Depth<br>to<br>Water<br>Depth | Snow<br>Water<br>Equivalent | Air<br>Flow<br>Type<br>Inflow =1<br>Outflow=2<br>Other=3 | Depth<br>of<br>Snow<br>on<br>Ground |
|--------|------|-------|-----|-------|---------------------------------|-------------|-------------|--------------------------|-------------------------|----------------------|---------------------------------------|-----------------------------|----------------------------------------------------------|-------------------------------------|
|        |      |       |     |       | Max<br>(LST)                    | Min<br>(°C) | Avg<br>(°C) | (g)                      | (cm)                    | (kg/m <sup>3</sup> ) | Ratio                                 | (mm H <sub>2</sub> O)       |                                                          | (cm)                                |
| 795    | 2008 | 1     | 2   | 5:45  | -1.0                            | -5.0        | -3.0        | 46.0                     | 18                      | 67.3                 | 14.9                                  | 12.1                        | 3                                                        | 183                                 |
| 796    | 2008 | 1     | 3   | 14:20 | -1.5                            | -2.5        | -2.0        | 33.0                     | 10                      | 86.8                 | 11.5                                  | 8.7                         | 3                                                        | 190                                 |
| 797    | 2008 | 1     | 4   | 5:45  | -1.5                            | -5.5        | -3.5        | 26.0                     | 8                       | 85.5                 | 11.7                                  | 6.8                         | 3                                                        | 198                                 |
| 798    | 2008 | 1     | 4   | 13:50 | -1.0                            | -5.5        | -3.3        | 33.0                     | 11                      | 78.9                 | 12.7                                  | 8.7                         | 3                                                        | 208                                 |
| 799    | 2008 | 1     | 5   | 5:35  | -1.0                            | -4.0        | -2.5        | 123.0                    | 36                      | 89.9                 | 11.1                                  | 32.4                        | 1                                                        | 235                                 |
| 800    | 2008 | 1     | 5   | 13:45 | -4.0                            | -5.0        | -4.5        | 29.0                     | 17                      | 44.9                 | 22.3                                  | 7.6                         | 1                                                        | 237                                 |
| 801    | 2008 | 1     | 6   | 5:30  | -5.0                            | -10.0       | -7.5        | 23.5                     | 6                       | 103.1                | 9.7                                   | 6.2                         | 3                                                        | 231                                 |
| 802    | 2008 | 1     | 6   | 13:40 | -7.0                            | -9.0        | -8.0        | 18.3                     | 8                       | 60.0                 | 16.7                                  | 4.8                         | 3                                                        | 236                                 |
| 803    | 2008 | 1     | 8   | 6:15  | -7.5                            | -11.0       | -9.3        | 13.5                     | 6                       | 59.2                 | 16.9                                  | 3.6                         | 3                                                        | 231                                 |
| 804    | 2008 | 1     | 9   | 5:45  | -5.0                            | -7.0        | -6.0        | 13.3                     | 5                       | 70.0                 | 14.3                                  | 3.5                         | 3                                                        | 230                                 |
| 805    | 2008 | 1     | 10  | 5:35  | -4.5                            | -8.0        | -6.3        | 36.0                     | 14                      | 67.7                 | 14.8                                  | 9.5                         | 3                                                        | 236                                 |
| 806    | 2008 | 1     | 10  | 13:40 | -1.5                            | -4.5        | -3.0        | 19.0                     | 7                       | 71.4                 | 14.0                                  | 5.0                         | 3                                                        | 239                                 |
| 807    | 2008 | 1     | 11  | 5:25  | -2.0                            | -3.0        | -2.5        | 44.0                     | 15                      | 77.2                 | 13.0                                  | 11.6                        | 3                                                        | 245                                 |
| 808    | 2008 | 1     | 14  | 5:25  | 0.0                             | -4.5        | -2.3        | 52.0                     | 11                      | 124.4                | 8.0                                   | 13.7                        | 1                                                        | 237                                 |
| 809    | 2008 | 1     | 14  | 13:35 | -0.5                            | -2.5        | -1.5        | 60.0                     | 10                      | 157.9                | 6.3                                   | 15.8                        | 1                                                        | 244                                 |
| 810    | 2008 | 1     | 15  | 5:45  | -2.5                            | -16.0       | -9.3        | 55.1                     | 11                      | 131.8                | 7.6                                   | 14.5                        | 3                                                        | 244                                 |
| 811    | 2008 | 1     | 19  | 13:30 | -5.0                            | -6.0        | -5.5        | 12.8                     | 6                       | 55.9                 | 17.9                                  | 3.4                         | 3                                                        | 233                                 |
| 812    | 2008 | 1     | 26  | 14:00 | -5.0                            | -7.5        | -6.3        | 15.5                     | 5                       | 81.6                 | 12.3                                  | 4.1                         | 3                                                        | 222                                 |
| 813    | 2008 | 1     | 27  | 5:40  | -6.5                            | -11.0       | -8.8        | 31.8                     | 13                      | 64.4                 | 15.5                                  | 8.4                         | 3                                                        | 230                                 |
| 814    | 2008 | 1     | 31  | 6:15  | -6.0                            | -7.5        | -6.8        | 44.0                     | 15                      | 77.2                 | 13.0                                  | 11.6                        | 3                                                        | 235                                 |
| 815    | 2008 | 2     | 5   | 14:00 | -5.0                            | -6.0        | -5.5        | 24.0                     | 10                      | 63.2                 | 15.8                                  | 6.3                         | 1                                                        | 240                                 |
| 816    | 2008 | 2     | 6   | 5:45  | -5.0                            | -9.5        | -7.3        | 35.7                     | 13                      | 72.3                 | 13.8                                  | 9.4                         | 1                                                        | 244                                 |
| 817    | 2008 | 2     | 7   | 5:45  | -5.5                            | -7.5        | -6.5        | 46.0                     | 18                      | 67.3                 | 14.9                                  | 12.1                        | 1                                                        | 257                                 |
| 818    | 2008 | 2     | 12  | 13:45 | 0.0                             | -1.5        | -0.8        | 20.4                     | 6                       | 89.5                 | 11.2                                  | 5.4                         | 1                                                        | 249                                 |
| 819    | 2008 | 2     | 13  | 5:50  | -0.5                            | -10.5       | -5.5        | 20.9                     | 5                       | 110.0                | 9.1                                   | 5.5                         | 3                                                        | 247                                 |
| 820    | 2008 | 2     | 29  | 13:30 | 1.0                             | -0.5        | 0.3         | 20.4                     | 5                       | 107.4                | 9.3                                   | 5.4                         | 3                                                        | 233                                 |
| 821    | 2008 | 3     | 1   | 5:30  | 0.0                             | -6.0        | -3.0        | 53.0                     | 16                      | 87.2                 | 11.5                                  | 13.9                        | 1                                                        | 245                                 |
| 822    | 2008 | 3     | 3   | 6:15  | -3.5                            | -6.5        | -5.0        | 18.5                     | 5                       | 97.4                 | 10.3                                  | 4.9                         | 1                                                        | 246                                 |
| 823    | 2008 | 3     | 3   | 13:55 | -2.5                            | -6.0        | -4.3        | 14.2                     | 5                       | 74.7                 | 13.4                                  | 3.7                         | 1                                                        | 250                                 |
| 824    | 2008 | 3     | 20  | 13:35 | -3.0                            | -6.0        | -4.5        | 20.5                     | 9                       | 59.9                 | 16.7                                  | 5.4                         | 3                                                        | 257                                 |
| 825    | 2008 | 3     | 21  | 5:40  | -2.0                            | -7.5        | -4.8        | 20.0                     | 6                       | 87.7                 | 11.4                                  | 5.3                         | 1                                                        | 257                                 |
| 826    | 2008 | 3     | 23  | 5:40  | 1.0                             | -4.0        | -1.5        | 51.5                     | 15                      | 90.4                 | 11.1                                  | 13.6                        | 1                                                        | 265                                 |
| 827    | 2008 | 3     | 23  | 13:46 | -1.0                            | -5.5        | -3.3        | 49.5                     | 16                      | 81.4                 | 12.3                                  | 13.0                        | 1                                                        | 275                                 |
| 828    | 2008 | 3     | 24  | 5:30  | -1.5                            | -9.0        | -5.3        | 28.0                     | 8                       | 92.1                 | 10.9                                  | 7.4                         | 1                                                        | 275                                 |
| 829    | 2008 | 3     | 26  | 5:45  | -4.5                            | -6.5        | -5.5        | 20.2                     | 8                       | 66.3                 | 15.1                                  | 5.3                         | 1                                                        | 276                                 |
| 830    | 2008 | 11    | 28  | 13:35 | 0.0                             | -1.5        | -0.8        | 31.0                     | 9                       | 90.6                 | 11.0                                  | 8.2                         | 3                                                        | 58                                  |
| 831    | 2008 | 12    | 7   | 6:30  | 1.0                             | -2.5        | -0.8        | 25.0                     | 9                       | 73.1                 | 13.7                                  | 6.6                         | 3                                                        | 48                                  |
| 832    | 2008 | 12    | 12  | 13:40 | -3.0                            | -5.0        | -4.0        | 28.0                     | 8                       | 92.1                 | 10.9                                  | 7.4                         | 3                                                        | 56                                  |
| 833    | 2008 | 12    | 21  | 6:20  | -12.0                           | -20.0       | -16.0       | 26.5                     | 14                      | 49.8                 | 20.1                                  | 7.0                         | 2                                                        | 74                                  |
| 834    | 2008 | 12    | 26  | 14:01 | -8.0                            | -12.5       | -10.3       | 16.0                     | 5                       | 84.2                 | 11.9                                  | 4.2                         | 3                                                        | 79                                  |

| Sample | Year | Month | Day | Time  | Sample Interval<br>Temperatures |             |             | Snow<br>Sample<br>Weight | Snow<br>Sample<br>Depth | Snow<br>Density      | Snow<br>Depth<br>to<br>Water<br>Depth | Snow<br>Water<br>Equivalent | Air<br>Flow<br>Type               | Depth<br>of<br>Snow<br>on<br>Ground |
|--------|------|-------|-----|-------|---------------------------------|-------------|-------------|--------------------------|-------------------------|----------------------|---------------------------------------|-----------------------------|-----------------------------------|-------------------------------------|
|        |      |       |     |       | Max<br>(LST)                    | Min<br>(°C) | Avg<br>(°C) | (g)                      | (cm)                    | (kg/m <sup>3</sup> ) | Ratio                                 | (mm H <sub>2</sub> O)       | Inflow =1<br>Outflow=2<br>Other=3 | (cm)                                |
| 835    | 2008 | 12    | 27  | 5:40  | -3.5                            | -8.0        | -5.8        | 38.0                     | 9                       | 111.1                | 9.0                                   | 10.0                        | 3                                 | 84                                  |
| 836    | 2008 | 12    | 29  | 5:45  | -6.0                            | -7.5        | -6.8        | 36.0                     | 16                      | 59.2                 | 16.9                                  | 9.5                         | 1                                 | 98                                  |
| 837    | 2008 | 12    | 29  | 13:37 | -6.5                            | -8.0        | -7.3        | 41.0                     | 13                      | 83.0                 | 12.0                                  | 10.8                        | 1                                 | 111                                 |
| 838    | 2008 | 12    | 30  | 5:45  | -6.0                            | -11.0       | -8.5        | 27.8                     | 7                       | 104.5                | 9.6                                   | 7.3                         | 3                                 | 107                                 |
| 839    | 2008 | 12    | 31  | 5:50  | -6.0                            | -8.5        | -7.3        | 71.0                     | 26                      | 71.9                 | 13.9                                  | 18.7                        | 1                                 | 125                                 |
| 840    | 2009 | 1     | 1   | 14:00 | -7.0                            | -9.0        | -8.0        | 23.0                     | 7                       | 86.5                 | 11.6                                  | 6.1                         | 3                                 | 124                                 |
| 841    | 2009 | 1     | 4   | 13:58 | -6.5                            | -8.5        | -7.5        | 18.0                     | 7                       | 67.7                 | 14.8                                  | 4.7                         | 3                                 | 120                                 |
| 842    | 2009 | 1     | 5   | 5:35  | -7.0                            | -8.5        | -7.8        | 71.5                     | 34                      | 55.3                 | 18.1                                  | 18.8                        | 3                                 | 148                                 |
| 843    | 2009 | 1     | 6   | 14:40 | -0.5                            | -4.5        | -2.5        | 36.0                     | 9                       | 105.3                | 9.5                                   | 9.5                         | 1                                 | 143                                 |
| 844    | 2009 | 1     | 7   | 5:45  | 1.5                             | -4.5        | -1.5        | 47.5                     | 12                      | 104.2                | 9.6                                   | 12.5                        | 3                                 | 146                                 |
| 845    | 2009 | 1     | 10  | 6:10  | -4.5                            | -5.5        | -5.0        | 41.0                     | 11                      | 98.1                 | 10.2                                  | 10.8                        | 1                                 | 148                                 |
| 846    | 2009 | 2     | 1   | 13:55 | -4.0                            | -9.0        | -6.5        | 13.5                     | 8                       | 44.4                 | 22.5                                  | 3.6                         | 1                                 | 129                                 |
| 847    | 2009 | 2     | 2   | 5:15  | -2.5                            | -6.5        | -4.5        | 45.0                     | 14                      | 84.6                 | 11.8                                  | 11.8                        | 3                                 | 142                                 |
| 848    | 2009 | 2     | 23  | 5:20  | 1.0                             | -2.0        | -0.5        | 83.5                     | 25                      | 87.9                 | 11.4                                  | 22.0                        | 2                                 | 160                                 |
| 849    | 2009 | 2     | 24  | 5:40  | 1.0                             | -4.0        | -1.5        | 39.5                     | 11                      | 94.5                 | 10.6                                  | 10.4                        | 1                                 | 166                                 |
| 850    | 2009 | 2     | 25  | 5:55  | -1.5                            | -5.0        | -3.3        | 43.5                     | 13                      | 88.1                 | 11.4                                  | 11.4                        | 2                                 | 173                                 |
| 851    | 2009 | 2     | 25  | 14:12 | -5.0                            | -14.0       | -9.5        | 42.1                     | 17                      | 65.2                 | 15.3                                  | 11.1                        | 2                                 | 188                                 |
| 852    | 2009 | 3     | 1   | 5:50  | 0.5                             | -6.5        | -3.0        | 71.9                     | 19                      | 99.6                 | 10.0                                  | 18.9                        | 2                                 | 188                                 |
| 853    | 2009 | 3     | 2   | 5:50  | 2.5                             | -0.5        | 1.0         | 58.6                     | 10                      | 154.2                | 6.5                                   | 15.4                        | 3                                 | 188                                 |
| 854    | 2009 | 3     | 2   | 13:48 | 1.0                             | -2.0        | -0.5        | 48.0                     | 8                       | 157.9                | 6.3                                   | 12.6                        | 3                                 | 193                                 |
| 855    | 2009 | 3     | 14  | 5:45  | 2.0                             | -4.0        | -1.0        | 39.5                     | 16                      | 65.0                 | 15.4                                  | 10.4                        | 1                                 | 192                                 |
| 856    | 2009 | 3     | 16  | 5:30  | -5.0                            | -8.0        | -6.5        | 68.5                     | 23                      | 78.4                 | 12.8                                  | 18.0                        | 1                                 | 220                                 |
| 857    | 2009 | 3     | 16  | 13:56 | -4.0                            | -7.0        | -5.5        | 61.6                     | 24                      | 67.5                 | 14.8                                  | 16.2                        | 1                                 | 222                                 |
| 858    | 2009 | 3     | 17  | 5:45  | -4.5                            | -8.5        | -6.5        | 35.4                     | 15                      | 62.0                 | 16.1                                  | 9.3                         | 1                                 | 231                                 |
| 859    | 2009 | 3     | 19  | 14:00 | -1.0                            | -2.5        | -1.8        | 24.4                     | 8                       | 80.3                 | 12.5                                  | 6.4                         | 1                                 | 230                                 |
| 860    | 2009 | 3     | 20  | 5:45  | -0.5                            | -2.5        | -1.5        | 56.9                     | 21                      | 71.3                 | 14.0                                  | 15.0                        | 1                                 | 244                                 |
| 861    | 2009 | 3     | 20  | 13:50 | -1.0                            | -3.0        | -2.0        | 57.8                     | 26                      | 58.5                 | 17.1                                  | 15.2                        | 1                                 | 265                                 |
| 862    | 2009 | 3     | 21  | 5:30  | -1.0                            | -13.0       | -7.0        | 32.8                     | 9                       | 95.9                 | 10.4                                  | 8.6                         | 3                                 | 259                                 |
| 863    | 2009 | 3     | 29  | 6:05  | -3.5                            | -11.5       | -7.5        | 19.5                     | 5                       | 102.6                | 9.7                                   | 5.1                         | 3                                 | 234                                 |
| 864    | 2009 | 4     | 2   | 6:10  | -3.0                            | -7.5        | -5.3        | 25.3                     | 5                       | 133.4                | 7.5                                   | 6.7                         | 1                                 | 233                                 |
| 865    | 2009 | 4     | 3   | 5:45  | 0.0                             | -6.5        | -3.3        | 38.0                     | 12                      | 83.3                 | 12.0                                  | 10.0                        | 3                                 | 240                                 |
| 866    | 2009 | 4     | 12  | 13:45 | -0.5                            | -2.0        | -1.3        | 18.5                     | 6                       | 81.1                 | 12.3                                  | 4.9                         | 1                                 | 215                                 |
| 867    | 2009 | 4     | 13  | 5:55  | 0.0                             | -5.5        | -2.8        | 41.5                     | 10                      | 109.2                | 9.2                                   | 10.9                        | 1                                 | 221                                 |
| 868    | 2009 | 4     | 17  | 6:10  | 3.5                             | -2.0        | 0.8         | 36.5                     | 9                       | 106.7                | 9.4                                   | 9.6                         | 1                                 | 218                                 |
| 869    | 2009 | 4     | 18  | 5:55  | 0.0                             | -6.5        | -3.3        | 37.6                     | 9                       | 109.9                | 9.1                                   | 9.9                         | 1                                 | 221                                 |
| 870    | 2009 | 11    | 15  | 6:40  | -2.0                            | -7.0        | -4.5        | 38.1                     | 11                      | 91.1                 | 11.0                                  | 10.0                        | 1                                 | 101                                 |
| 871    | 2009 | 11    | 15  | 13:40 | -0.5                            | -1.5        | -1.0        | 51.3                     | 20                      | 67.5                 | 14.8                                  | 13.5                        | 1                                 | 119                                 |
| 872    | 2009 | 11    | 16  | 6:30  | 0.5                             | -1.0        | -0.3        | 215.0                    | 51                      | 110.9                | 9.0                                   | 56.6                        | 3                                 | 156                                 |
| 873    | 2009 | 11    | 17  | 6:00  | 0.5                             | -4.0        | -1.8        | 166.0                    | 41                      | 106.5                | 9.4                                   | 43.7                        | 1                                 | 190                                 |
| 874    | 2009 | 11    | 18  | 6:20  | -5.5                            | -7.0        | -6.3        | 52.5                     | 19                      | 72.7                 | 13.8                                  | 13.8                        | 1                                 | 193                                 |

| Sample | Year | Month | Day | Time  | Sample Interval<br>Temperatures |             |             | Snow<br>Sample<br>Weight | Snow<br>Sample<br>Depth | Snow<br>Density      | Snow<br>Depth<br>to<br>Water<br>Depth | Snow<br>Water<br>Equivalent | Air<br>Flow<br>Type<br>Inflow =1<br>Outflow=2<br>Other=3 | Depth<br>of<br>Snow<br>on<br>Ground |
|--------|------|-------|-----|-------|---------------------------------|-------------|-------------|--------------------------|-------------------------|----------------------|---------------------------------------|-----------------------------|----------------------------------------------------------|-------------------------------------|
|        |      |       |     |       | Max<br>(LST)                    | Min<br>(°C) | Avg<br>(°C) | (g)                      | (cm)                    | (kg/m <sup>3</sup> ) | Ratio                                 | (mm H <sub>2</sub> O)       |                                                          | (cm)                                |
| 875    | 2009 | 11    | 19  | 6:20  | -3.0                            | -6.0        | -4.5        | 135.5                    | 47                      | 75.9                 | 13.2                                  | 35.7                        | 3                                                        | 227                                 |
| 876    | 2009 | 11    | 19  | 14:20 | -3.0                            | -4.0        | -3.5        | 48.6                     | 8                       | 159.9                | 6.3                                   | 12.8                        | 3                                                        | 224                                 |
| 877    | 2009 | 11    | 20  | 13:35 | -1.0                            | -3.0        | -2.0        | 44.1                     | 11                      | 105.5                | 9.5                                   | 11.6                        | 3                                                        | 253                                 |
| 878    | 2009 | 11    | 21  | 6:00  | -2.5                            | -6.0        | -4.3        | 23.4                     | 10                      | 61.6                 | 16.2                                  | 6.2                         | 3                                                        | 243                                 |
| 879    | 2009 | 11    | 22  | 6:00  | -4.0                            | -6.0        | -5.0        | 37.6                     | 13                      | 76.1                 | 13.1                                  | 9.9                         | 3                                                        | 239                                 |
| 880    | 2009 | 11    | 23  | 14:00 | -2.0                            | -5.0        | -3.5        | 20.5                     | 7                       | 77.1                 | 13.0                                  | 5.4                         | 1                                                        | 228                                 |
| 881    | 2009 | 11    | 26  | 5:45  | 2.0                             | -1.0        | 0.5         | 56.0                     | 11                      | 134.0                | 7.5                                   | 14.7                        | 3                                                        | 201                                 |
| 882    | 2009 | 12    | 15  | 5:45  | -3.0                            | -12.0       | -7.5        | 32.2                     | 11                      | 77.0                 | 13.0                                  | 8.5                         | 2                                                        | 181                                 |
| 883    | 2009 | 12    | 16  | 5:45  | -0.5                            | -2.0        | -1.3        | 69.9                     | 21                      | 87.6                 | 11.4                                  | 18.4                        | 2                                                        | 198                                 |
| 884    | 2009 | 12    | 16  | 14:00 | -1.0                            | -1.5        | -1.3        | 95.9                     | 28                      | 90.1                 | 11.1                                  | 25.2                        | 2                                                        | 220                                 |
| 885    | 2009 | 12    | 17  | 6:00  | -1.0                            | -2.0        | -1.5        | 31.5                     | 9                       | 92.1                 | 10.9                                  | 8.3                         | 3                                                        | 218                                 |
| 886    | 2009 | 12    | 18  | 6:00  | 1.0                             | -1.5        | -0.3        | 24.8                     | 5                       | 130.3                | 7.7                                   | 6.5                         | 3                                                        | 216                                 |
| 887    | 2009 | 12    | 20  | 5:45  | -2.0                            | -6.0        | -4.0        | 61.5                     | 17                      | 95.2                 | 10.5                                  | 16.2                        | 2                                                        | 225                                 |
| 888    | 2009 | 12    | 21  | 5:45  | 1.5                             | 0.0         | 0.8         | 80.5                     | 21                      | 100.9                | 9.9                                   | 21.2                        | 3                                                        | 244                                 |
| 889    | 2009 | 12    | 21  | 14:10 | 0.0                             | -2.0        | -1.0        | 31.5                     | 15                      | 55.3                 | 18.1                                  | 8.3                         | 3                                                        | 252                                 |
| 890    | 2009 | 12    | 31  | 6:15  | -3.5                            | -5.5        | -4.5        | 11.8                     | 5                       | 62.1                 | 16.1                                  | 3.1                         | 2                                                        | 218                                 |
| 891    | 2010 | 1     | 1   | 5:50  | 0.0                             | -6.0        | -3.0        | 37.5                     | 9                       | 109.6                | 9.1                                   | 9.9                         | 2                                                        | 223                                 |
| 892    | 2010 | 1     | 1   | 14:15 | -0.5                            | -4.5        | -2.5        | 66.2                     | 23                      | 75.7                 | 13.2                                  | 17.4                        | 2                                                        | 246                                 |
| 893    | 2010 | 1     | 2   | 5:45  | -0.5                            | -4.0        | -2.3        | 29.2                     | 8                       | 95.9                 | 10.4                                  | 7.7                         | 3                                                        | 243                                 |
| 894    | 2010 | 1     | 11  | 6:00  | 2.5                             | 0.5         | 1.5         | 161.5                    | 16                      | 265.6                | 3.8                                   | 42.5                        | 3                                                        | 240                                 |
| 895    | 2010 | 1     | 12  | 5:45  | 2.0                             | 0.5         | 1.3         | 143.5                    | 12                      | 314.7                | 3.2                                   | 37.8                        | 3                                                        | 244                                 |
| 896    | 2010 | 1     | 14  | 14:00 | -1.5                            | -3.0        | -2.3        | 29.5                     | 11                      | 70.6                 | 14.2                                  | 7.8                         | 1                                                        | 253                                 |
| 897    | 2010 | 1     | 15  | 5:50  | -2.0                            | -2.5        | -2.3        | 142.5                    | 47                      | 79.8                 | 12.5                                  | 37.5                        | 3                                                        | 283                                 |
| 898    | 2010 | 1     | 15  | 13:46 | -0.5                            | -3.0        | -1.8        | 84.3                     | 23                      | 96.5                 | 10.4                                  | 22.2                        | 3                                                        | 297                                 |
| 899    | 2010 | 1     | 17  | 6:20  | -1.5                            | -8.0        | -4.8        | 32.0                     | 11                      | 76.6                 | 13.1                                  | 8.4                         | 2                                                        | 288                                 |
| 900    | 2010 | 1     | 18  | 5:50  | 0.0                             | -3.0        | -1.5        | 56.2                     | 17                      | 87.0                 | 11.5                                  | 14.8                        | 3                                                        | 298                                 |
| 901    | 2010 | 1     | 18  | 13:35 | -1.5                            | -2.5        | -2.0        | 67.6                     | 19                      | 93.6                 | 10.7                                  | 17.8                        | 3                                                        | 310                                 |
| 902    | 2010 | 1     | 19  | 14:05 | 0.0                             | -3.0        | -1.5        | 15.5                     | 5                       | 81.6                 | 12.3                                  | 4.1                         | 2                                                        | 303                                 |
| 903    | 2010 | 1     | 25  | 5:45  | -1.5                            | -5.0        | -3.3        | 20.2                     | 9                       | 59.1                 | 16.9                                  | 5.3                         | 3                                                        | 284                                 |
| 904    | 2010 | 1     | 25  | 13:40 | -1.0                            | -3.0        | -2.0        | 22.4                     | 11                      | 53.6                 | 18.7                                  | 5.9                         | 3                                                        | 292                                 |
| 905    | 2010 | 1     | 26  | 5:45  | -1.0                            | -3.5        | -2.3        | 13.5                     | 5                       | 71.1                 | 14.1                                  | 3.6                         | 3                                                        | 289                                 |
| 906    | 2010 | 2     | 11  | 13:50 | 0.5                             | -3.5        | -1.5        | 14.5                     | 5                       | 76.3                 | 13.1                                  | 3.8                         | 3                                                        | 269                                 |
| 907    | 2010 | 2     | 12  | 5:55  | 2.0                             | -1.5        | 0.3         | 60.1                     | 19                      | 83.2                 | 12.0                                  | 15.8                        | 3                                                        | 285                                 |
| 908    | 2010 | 2     | 13  | 5:40  | -1.0                            | -2.5        | -1.8        | 24.6                     | 9                       | 71.9                 | 13.9                                  | 6.5                         | 3                                                        | 290                                 |
| 909    | 2010 | 2     | 14  | 4:30  | 1.0                             | -1.0        | 0.0         | 82.2                     | 18                      | 120.2                | 8.3                                   | 21.6                        | 3                                                        | 301                                 |
| 910    | 2010 | 2     | 14  | 14:00 | 0.5                             | -2.0        | -0.8        | 30.2                     | 10                      | 79.5                 | 12.6                                  | 7.9                         | 3                                                        | 307                                 |
| 911    | 2010 | 2     | 16  | 5:45  | 0.0                             | -3.5        | -1.8        | 30.5                     | 8                       | 100.3                | 10.0                                  | 8.0                         | 3                                                        | 303                                 |
| 912    | 2010 | 2     | 16  | 13:50 | 0.0                             | -1.0        | -0.5        | 25.5                     | 7                       | 95.9                 | 10.4                                  | 6.7                         | 3                                                        | 307                                 |
| 913    | 2010 | 2     | 25  | 6:20  | -0.5                            | -3.0        | -1.8        | 15.6                     | 7                       | 58.5                 | 17.1                                  | 4.1                         | 3                                                        | 290                                 |
| 914    | 2010 | 2     | 26  | 13:35 | 1.0                             | -4.0        | -1.5        | 14.5                     | 6                       | 63.6                 | 15.7                                  | 3.8                         | 3                                                        | 286                                 |

| Sample | Year | Month | Day | Time  | Sample Interval<br>Temperatures |             |             | Snow<br>Sample<br>Weight | Snow<br>Sample<br>Depth | Snow<br>Density      | Snow<br>Depth<br>to<br>Water<br>Depth | Snow<br>Water<br>Equivalent | Air<br>Flow<br>Type<br>Inflow =1<br>Outflow=2<br>Other=3 | Depth<br>of<br>Snow<br>on<br>Ground |
|--------|------|-------|-----|-------|---------------------------------|-------------|-------------|--------------------------|-------------------------|----------------------|---------------------------------------|-----------------------------|----------------------------------------------------------|-------------------------------------|
|        |      |       |     |       | Max<br>(LST)                    | Min<br>(°C) | Avg<br>(°C) | (g)                      | (cm)                    | (kg/m <sup>3</sup> ) | Ratio                                 | (mm H <sub>2</sub> O)       |                                                          | (cm)                                |
| 915    | 2010 | 2     | 27  | 5:45  | 1.5                             | -2.0        | -0.3        | 16.2                     | 7                       | 60.9                 | 16.4                                  | 4.3                         | 3                                                        | 290                                 |
| 916    | 2010 | 3     | 7   | 14:05 | -1.0                            | -2.0        | -1.5        | 16.3                     | 5                       | 85.8                 | 11.7                                  | 4.3                         | 3                                                        | 289                                 |
| 917    | 2010 | 3     | 8   | 5:40  | -1.0                            | -11.0       | -6.0        | 18.1                     | 7                       | 68.0                 | 14.7                                  | 4.8                         | 3                                                        | 296                                 |
| 918    | 2010 | 3     | 11  | 5:40  | -4.5                            | -7.0        | -5.8        | 51.5                     | 18                      | 75.3                 | 13.3                                  | 13.6                        | 1                                                        | 309                                 |
| 919    | 2010 | 3     | 11  | 13:45 | -4.0                            | -6.5        | -5.3        | 27.7                     | 7                       | 104.1                | 9.6                                   | 7.3                         | 1                                                        | 313                                 |
| 920    | 2010 | 3     | 12  | 5:40  | -2.5                            | -7.0        | -4.8        | 45.3                     | 21                      | 56.8                 | 17.6                                  | 11.9                        | 3                                                        | 327                                 |
| 921    | 2010 | 3     | 12  | 14:15 | -4.0                            | -7.5        | -5.8        | 48.8                     | 18                      | 71.3                 | 14.0                                  | 12.8                        | 3                                                        | 337                                 |
| 922    | 2010 | 3     | 15  | 5:40  | -2.0                            | -4.5        | -3.3        | 39.2                     | 15                      | 68.8                 | 14.5                                  | 10.3                        | 3                                                        | 334                                 |
| 923    | 2010 | 3     | 16  | 14:00 | 1.5                             | 0.0         | 0.8         | 46.5                     | 6                       | 203.9                | 4.9                                   | 12.2                        | 3                                                        | 320                                 |
| 924    | 2010 | 3     | 17  | 5:45  | 1.5                             | -4.0        | -1.3        | 49.2                     | 10                      | 129.5                | 7.7                                   | 12.9                        | 1                                                        | 325                                 |
| 925    | 2010 | 3     | 21  | 5:45  | 6.0                             | -1.0        | 2.5         | 20.5                     | 8                       | 67.4                 | 14.8                                  | 5.4                         | 1                                                        | 323                                 |
| 926    | 2010 | 3     | 28  | 5:45  | 3.5                             | -1.5        | 1.0         | 45.5                     | 14                      | 85.5                 | 11.7                                  | 12.0                        | 1                                                        | 323                                 |
| 927    | 2010 | 3     | 29  | 5:45  | 0.0                             | -3.5        | -1.8        | 97.1                     | 30                      | 85.2                 | 11.7                                  | 25.6                        | 1                                                        | 355                                 |
| 928    | 2010 | 3     | 29  | 13:40 | -3.5                            | -5.0        | -4.3        | 72.0                     | 17                      | 111.5                | 9.0                                   | 18.9                        | 1                                                        | 367                                 |
| 929    | 2010 | 3     | 30  | 5:45  | -2.5                            | -6.0        | -4.3        | 33.5                     | 9                       | 98.0                 | 10.2                                  | 8.8                         | 1                                                        | 366                                 |
| 930    | 2010 | 3     | 30  | 13:55 | -2.5                            | -6.5        | -4.5        | 18.5                     | 7                       | 69.5                 | 14.4                                  | 4.9                         | 1                                                        | 369                                 |
| 931    | 2010 | 4     | 1   | 13:45 | -2.5                            | -6.5        | -4.5        | 24.3                     | 6                       | 106.4                | 9.4                                   | 6.4                         | 1                                                        | 360                                 |
| 932    | 2010 | 4     | 2   | 13:45 | -3.0                            | -5.5        | -4.3        | 21.9                     | 9                       | 63.9                 | 15.7                                  | 5.8                         | 3                                                        | 366                                 |
| 933    | 2010 | 4     | 3   | 5:45  | -3.0                            | -5.0        | -4.0        | 88.9                     | 24                      | 97.5                 | 10.3                                  | 23.4                        | 1                                                        | 387                                 |
| 934    | 2010 | 4     | 6   | 6:15  | -0.5                            | -6.0        | -3.3        | 15.5                     | 10                      | 40.8                 | 24.5                                  | 4.1                         | 1                                                        | 378                                 |
| 935    | 2010 | 4     | 8   | 5:50  | -1.0                            | -7.0        | -4.0        | 64.1                     | 16                      | 105.4                | 9.5                                   | 16.9                        | 1                                                        | 380                                 |
| 936    | 2010 | 4     | 9   | 6:10  | -4.0                            | -12.0       | -8.0        | 18.3                     | 5                       | 96.1                 | 10.4                                  | 4.8                         | 1                                                        | 379                                 |
| 937    | 2010 | 4     | 13  | 6:15  | 5.5                             | -1.0        | 2.3         | 19.5                     | 5                       | 102.6                | 9.7                                   | 5.1                         | 1                                                        | 365                                 |
| 938    | 2010 | 4     | 24  | 6:10  | 1.5                             | -4.5        | -1.5        | 20.8                     | 7                       | 78.2                 | 12.8                                  | 5.5                         | 1                                                        | 321                                 |
| 939    | 2010 | 11    | 20  | 6:45  | -11.5                           | -16.0       | -13.8       | 20.5                     | 10                      | 53.9                 | 18.5                                  | 5.4                         | 2                                                        | 98                                  |
| 940    | 2010 | 11    | 26  | 6:10  | -2.0                            | -7.0        | -4.5        | 69.5                     | 25                      | 73.2                 | 13.7                                  | 18.3                        | 3                                                        | 107                                 |
| 941    | 2010 | 11    | 27  | 6:25  | -3.5                            | -9.5        | -6.5        | 45.3                     | 18                      | 66.2                 | 15.1                                  | 11.9                        | 3                                                        | 119                                 |
| 942    | 2010 | 11    | 30  | 6:25  | -3.5                            | -5.0        | -4.3        | 110.0                    | 31                      | 93.4                 | 10.7                                  | 28.9                        | 3                                                        | 135                                 |
| 943    | 2010 | 11    | 30  | 14:35 | -2.0                            | -4.0        | -3.0        | 24.7                     | 6                       | 108.3                | 9.2                                   | 6.5                         | 3                                                        | 137                                 |
| 944    | 2010 | 12    | 8   | 5:45  | 1.0                             | -1.0        | 0.0         | 69.2                     | 18                      | 101.2                | 9.9                                   | 18.2                        | 3                                                        | 128                                 |
| 945    | 2010 | 12    | 8   | 14:00 | -1.0                            | -2.5        | -1.8        | 30.0                     | 7                       | 112.8                | 8.9                                   | 7.9                         | 3                                                        | 135                                 |
| 946    | 2010 | 12    | 9   | 5:40  | -2.0                            | -3.0        | -2.5        | 64.0                     | 17                      | 99.1                 | 10.1                                  | 16.8                        | 3                                                        | 150                                 |
| 947    | 2010 | 12    | 9   | 14:00 | -2.0                            | -2.5        | -2.3        | 35.6                     | 11                      | 85.2                 | 11.7                                  | 9.4                         | 3                                                        | 158                                 |
| 948    | 2010 | 12    | 12  | 5:50  | 2.0                             | -5.0        | -1.5        | 83.0                     | 21                      | 104.0                | 9.6                                   | 21.8                        | 3                                                        | 165                                 |
| 949    | 2010 | 12    | 14  | 5:50  | -0.5                            | -6.0        | -3.3        | 48.3                     | 12                      | 105.9                | 9.4                                   | 12.7                        | 1                                                        | 158                                 |
| 950    | 2010 | 12    | 14  | 14:05 | -5.5                            | -6.5        | -6.0        | 27.3                     | 9                       | 79.8                 | 12.5                                  | 7.2                         | 1                                                        | 165                                 |
| 951    | 2010 | 12    | 21  | 6:20  | -4.0                            | -7.0        | -5.5        | 27.3                     | 9                       | 79.8                 | 12.5                                  | 7.2                         | 2                                                        | 158                                 |
| 952    | 2010 | 12    | 22  | 6:15  | -2.0                            | -3.5        | -2.8        | 43.0                     | 16                      | 70.7                 | 14.1                                  | 11.3                        | 3                                                        | 172                                 |
| 953    | 2010 | 12    | 22  | 13:55 | -2.0                            | -3.0        | -2.5        | 19.5                     | 9                       | 57.0                 | 17.5                                  | 5.1                         | 3                                                        | 175                                 |
| 954    | 2010 | 12    | 23  | 6:15  | -1.5                            | -5.0        | -3.3        | 33.0                     | 13                      | 66.8                 | 15.0                                  | 8.7                         | 3                                                        | 180                                 |

| Sample | Year | Month | Day | Time  | Sample Interval<br>Temperatures |             |             | Snow<br>Sample<br>Weight | Snow<br>Sample<br>Depth | Snow<br>Density      | Snow<br>Depth<br>to<br>Water<br>Depth | Snow<br>Water<br>Equivalent | Air<br>Flow<br>Type               | Depth<br>of<br>Snow<br>on<br>Ground |
|--------|------|-------|-----|-------|---------------------------------|-------------|-------------|--------------------------|-------------------------|----------------------|---------------------------------------|-----------------------------|-----------------------------------|-------------------------------------|
|        |      |       |     |       | Max<br>(LST)                    | Min<br>(°C) | Avg<br>(°C) | (g)                      | (cm)                    | (kg/m <sup>3</sup> ) | Ratio                                 | (mm H <sub>2</sub> O)       | Inflow =1<br>Outflow=2<br>Other=3 | (cm)                                |
| 955    | 2010 | 12    | 23  | 14:15 | -3.0                            | -4.5        | -3.8        | 39.0                     | 16                      | 64.1                 | 15.6                                  | 10.3                        | 3                                 | 193                                 |
| 956    | 2010 | 12    | 24  | 5:35  | -1.5                            | -3.0        | -2.3        | 81.0                     | 28                      | 76.1                 | 13.1                                  | 21.3                        | 3                                 | 212                                 |
| 957    | 2010 | 12    | 24  | 14:20 | -1.5                            | -2.0        | -1.8        | 68.5                     | 29                      | 62.2                 | 16.1                                  | 18.0                        | 3                                 | 229                                 |
| 958    | 2010 | 12    | 25  | 5:50  | -0.5                            | -1.0        | -0.8        | 101.5                    | 45                      | 59.4                 | 16.8                                  | 26.7                        | 3                                 | 259                                 |
| 959    | 2010 | 12    | 25  | 13:35 | 0.5                             | -1.0        | -0.3        | 43.5                     | 11                      | 104.1                | 9.6                                   | 11.4                        | 3                                 | 260                                 |
| 960    | 2010 | 12    | 26  | 5:45  | 0.5                             | -4.0        | -1.8        | 58.0                     | 17                      | 89.8                 | 11.1                                  | 15.3                        | 3                                 | 257                                 |
| 961    | 2010 | 12    | 26  | 13:50 | -3.5                            | -4.0        | -3.8        | 24.5                     | 9                       | 71.6                 | 14.0                                  | 6.4                         | 3                                 | 259                                 |
| 962    | 2010 | 12    | 27  | 5:45  | -3.0                            | -6.5        | -4.8        | 34.5                     | 12                      | 75.7                 | 13.2                                  | 9.1                         | 1                                 | 256                                 |
| 963    | 2011 | 1     | 5   | 14:20 | -1.0                            | -3.0        | -2.0        | 36.7                     | 10                      | 96.6                 | 10.4                                  | 9.7                         | 1                                 | 212                                 |
| 964    | 2011 | 1     | 6   | 5:45  | 0.0                             | -2.0        | -1.0        | 44.1                     | 16                      | 72.5                 | 13.8                                  | 11.6                        | 3                                 | 222                                 |
| 965    | 2011 | 1     | 7   | 6:00  | 0.5                             | -1.0        | -0.3        | 65.0                     | 19                      | 90.0                 | 11.1                                  | 17.1                        | 1                                 | 240                                 |
| 966    | 2011 | 1     | 7   | 14:10 | -1.0                            | -3.0        | -2.0        | 37.3                     | 17                      | 57.7                 | 17.3                                  | 9.8                         | 1                                 | 252                                 |
| 967    | 2011 | 1     | 12  | 5:45  | -5.5                            | -12.5       | -9.0        | 62.9                     | 25                      | 66.2                 | 15.1                                  | 16.6                        | 3                                 | 247                                 |
| 968    | 2011 | 1     | 14  | 13:50 | 1.5                             | -1.0        | 0.3         | 46.0                     | 11                      | 110.0                | 9.1                                   | 12.1                        | 3                                 | 255                                 |
| 969    | 2011 | 1     | 15  | 5:50  | 2.0                             | -0.5        | 0.8         | 25.4                     | 8                       | 83.6                 | 12.0                                  | 6.7                         | 1                                 | 255                                 |
| 970    | 2011 | 1     | 16  | 5:45  | 2.5                             | -1.5        | 0.5         | 40.4                     | 6                       | 177.2                | 5.6                                   | 10.6                        | 3                                 | 255                                 |
| 971    | 2011 | 1     | 21  | 6:20  | -3.0                            | -5.0        | -4.0        | 16.5                     | 6                       | 72.4                 | 13.8                                  | 4.3                         | 3                                 | 233                                 |
| 972    | 2011 | 1     | 28  | 13:50 | 0.5                             | -1.0        | -0.3        | 16.7                     | 5                       | 87.9                 | 11.4                                  | 4.4                         | 3                                 | 233                                 |
| 973    | 2011 | 1     | 29  | 6:20  | 0.0                             | -5.5        | -2.8        | 16.5                     | 7                       | 62.0                 | 16.1                                  | 4.3                         | 2                                 | 236                                 |
| 974    | 2011 | 2     | 7   | 5:40  | 1.0                             | -4.0        | -1.5        | 26.0                     | 10                      | 68.4                 | 14.6                                  | 6.8                         | 3                                 | 228                                 |
| 975    | 2011 | 2     | 12  | 5:45  | -2.0                            | -4.0        | -3.0        | 71.0                     | 21                      | 89.0                 | 11.2                                  | 18.7                        | 1                                 | 247                                 |
| 976    | 2011 | 2     | 12  | 13:35 | -2.0                            | -3.0        | -2.5        | 85.0                     | 34                      | 65.8                 | 15.2                                  | 22.4                        | 1                                 | 277                                 |
| 977    | 2011 | 2     | 13  | 5:40  | -2.5                            | -6.0        | -4.3        | 71.5                     | 20                      | 94.1                 | 10.6                                  | 18.8                        | 1                                 | 279                                 |
| 978    | 2011 | 2     | 14  | 6:15  | -2.0                            | -7.0        | -4.5        | 30.3                     | 11                      | 72.5                 | 13.8                                  | 8.0                         | 3                                 | 280                                 |
| 979    | 2011 | 2     | 14  | 13:45 | -2.0                            | -6.0        | -4.0        | 64.1                     | 24                      | 70.3                 | 14.2                                  | 16.9                        | 3                                 | 300                                 |
| 980    | 2011 | 2     | 15  | 5:50  | -2.0                            | -6.5        | -4.3        | 77.7                     | 25                      | 81.8                 | 12.2                                  | 20.4                        | 1                                 | 310                                 |
| 981    | 2011 | 2     | 16  | 6:15  | -4.0                            | -8.0        | -6.0        | 91.3                     | 35                      | 68.6                 | 14.6                                  | 24.0                        | 3                                 | 332                                 |
| 982    | 2011 | 2     | 16  | 14:00 | -5.5                            | -8.0        | -6.8        | 19.9                     | 6                       | 87.3                 | 11.5                                  | 5.2                         | 3                                 | 330                                 |
| 983    | 2011 | 2     | 17  | 6:00  | -5.5                            | -10.0       | -7.8        | 12.3                     | 5                       | 64.5                 | 15.5                                  | 3.2                         | 1                                 | 328                                 |
| 984    | 2011 | 2     | 18  | 5:50  | -7.0                            | -9.5        | -8.3        | 61.5                     | 25                      | 64.7                 | 15.4                                  | 16.2                        | 2                                 | 333                                 |
| 985    | 2011 | 2     | 28  | 5:40  | -6.0                            | -10.0       | -8.0        | 17.2                     | 7                       | 64.7                 | 15.5                                  | 4.5                         | 3                                 | 299                                 |
| 986    | 2011 | 3     | 1   | 6:10  | -6.5                            | -10.5       | -8.5        | 16.8                     | 7                       | 63.0                 | 15.9                                  | 4.4                         | 2                                 | 297                                 |
| 987    | 2011 | 3     | 2   | 5:45  | -3.5                            | -9.0        | -6.3        | 38.0                     | 14                      | 71.4                 | 14.0                                  | 10.0                        | 3                                 | 306                                 |
| 988    | 2011 | 3     | 3   | 5:40  | -5.0                            | -8.0        | -6.5        | 30.4                     | 6                       | 133.1                | 7.5                                   | 8.0                         | 1                                 | 307                                 |
| 989    | 2011 | 3     | 5   | 5:45  | -3.5                            | -8.0        | -5.8        | 46.5                     | 17                      | 72.0                 | 13.9                                  | 12.2                        | 3                                 | 323                                 |
| 990    | 2011 | 3     | 9   | 14:00 | -1.0                            | -3.5        | -2.3        | 56.5                     | 18                      | 82.6                 | 12.1                                  | 14.9                        | 3                                 | 325                                 |
| 991    | 2011 | 3     | 10  | 5:45  | -0.5                            | -2.5        | -1.5        | 68.2                     | 17                      | 105.6                | 9.5                                   | 17.9                        | 3                                 | 331                                 |
| 992    | 2011 | 3     | 10  | 13:50 | -1.0                            | -3.5        | -2.3        | 26.6                     | 10                      | 70.0                 | 14.3                                  | 7.0                         | 3                                 | 337                                 |
| 993    | 2011 | 3     | 12  | 5:45  | -3.0                            | -8.0        | -5.5        | 76.0                     | 26                      | 76.9                 | 13.0                                  | 20.0                        | 1                                 | 358                                 |
| 994    | 2011 | 3     | 12  | 13:50 | -1.5                            | -4.0        | -2.8        | 25.5                     | 14                      | 47.9                 | 20.9                                  | 6.7                         | 1                                 | 364                                 |

| Sample | Year | Month | Day | Time  | Sample Interval<br>Temperatures |             |             | Snow<br>Sample<br>Weight | Snow<br>Sample<br>Depth | Snow<br>Density      | Snow<br>Depth<br>to<br>Water<br>Depth | Snow<br>Water<br>Equivalent | Air<br>Flow<br>Type               | Depth<br>of<br>Snow<br>on<br>Ground |
|--------|------|-------|-----|-------|---------------------------------|-------------|-------------|--------------------------|-------------------------|----------------------|---------------------------------------|-----------------------------|-----------------------------------|-------------------------------------|
|        |      |       |     |       | Max<br>(LST)                    | Min<br>(°C) | Avg<br>(°C) | (g)                      | (cm)                    | (kg/m <sup>3</sup> ) | Ratio                                 | (mm H <sub>2</sub> O)       | Inflow =1<br>Outflow=2<br>Other=3 | (cm)                                |
| 995    | 2011 | 3     | 14  | 5:40  | 0.0                             | -4.5        | -2.3        | 97.3                     | 26                      | 98.5                 | 10.2                                  | 25.6                        | 1                                 | 378                                 |
| 996    | 2011 | 3     | 15  | 5:50  | -2.0                            | -3.5        | -2.8        | 48.3                     | 13                      | 97.8                 | 10.2                                  | 12.7                        | 3                                 | 380                                 |
| 997    | 2011 | 3     | 15  | 14:20 | -0.5                            | -2.5        | -1.5        | 42.4                     | 12                      | 93.0                 | 10.8                                  | 11.2                        | 3                                 | 385                                 |
| 998    | 2011 | 3     | 16  | 5:45  | -0.5                            | -4.0        | -2.3        | 67.3                     | 22                      | 80.5                 | 12.4                                  | 17.7                        | 1                                 | 388                                 |
| 999    | 2011 | 3     | 19  | 6:15  | -2.0                            | -5.0        | -3.5        | 22.5                     | 7                       | 84.6                 | 11.8                                  | 5.9                         | 3                                 | 368                                 |
| 1000   | 2011 | 3     | 29  | 6:30  | -0.5                            | -4.0        | -2.3        | 17.8                     | 7                       | 66.9                 | 14.9                                  | 4.7                         | 1                                 | 348                                 |
| 1001   | 2011 | 3     | 30  | 5:50  | 0.0                             | -2.5        | -1.3        | 29.0                     | 9                       | 84.8                 | 11.8                                  | 7.6                         | 1                                 | 350                                 |
| 1002   | 2011 | 3     | 31  | 6:15  | 2.5                             | -0.5        | 1.0         | 40.9                     | 11                      | 97.8                 | 10.2                                  | 10.8                        | 1                                 | 348                                 |
| 1003   | 2011 | 4     | 1   | 6:20  | 2.5                             | -4.0        | -0.8        | 22.1                     | 5                       | 116.3                | 8.6                                   | 5.8                         | 1                                 | 344                                 |
| 1004   | 2011 | 4     | 2   | 6:15  | -1.5                            | -6.0        | -3.8        | 19.5                     | 6                       | 85.5                 | 11.7                                  | 5.1                         | 1                                 | 348                                 |
| 1005   | 2011 | 4     | 4   | 5:45  | -2.5                            | -5.0        | -3.8        | 31.3                     | 7                       | 117.7                | 8.5                                   | 8.2                         | 1                                 | 345                                 |
| 1006   | 2011 | 4     | 5   | 6:15  | -1.0                            | -6.0        | -3.5        | 31.5                     | 10                      | 82.9                 | 12.1                                  | 8.3                         | 1                                 | 349                                 |
| 1007   | 2011 | 4     | 10  | 13:45 | -0.5                            | -3.0        | -1.8        | 35.1                     | 6                       | 153.9                | 6.5                                   | 9.2                         | 1                                 | 349                                 |
| 1008   | 2011 | 4     | 11  | 5:45  | 0.0                             | -5.0        | -2.5        | 69.3                     | 21                      | 86.8                 | 11.5                                  | 18.2                        | 1                                 | 373                                 |
| 1009   | 2011 | 4     | 13  | 6:15  | -1.0                            | -5.0        | -3.0        | 20.5                     | 8                       | 67.4                 | 14.8                                  | 5.4                         | 1                                 | 372                                 |
| 1010   | 2011 | 4     | 15  | 6:15  | -4.5                            | -11.0       | -7.8        | 20.3                     | 8                       | 66.6                 | 15.0                                  | 5.3                         | 3                                 | 378                                 |
| 1011   | 2011 | 11    | 18  | 6:20  | -8.0                            | -10.0       | -9.0        | 13.5                     | 6                       | 59.2                 | 16.9                                  | 3.6                         | 2                                 | 71                                  |
| 1012   | 2011 | 11    | 21  | 13:40 | -4.0                            | -7.0        | -5.5        | 19.5                     | 9                       | 57.0                 | 17.5                                  | 5.1                         | 2                                 | 81                                  |
| 1013   | 2011 | 11    | 22  | 6:25  | -1.5                            | -5.0        | -3.3        | 192.5                    | 60                      | 84.4                 | 11.8                                  | 50.7                        | 3                                 | 134                                 |
| 1014   | 2011 | 11    | 23  | 6:20  | -2.5                            | -4.5        | -3.5        | 70.3                     | 18                      | 102.8                | 9.7                                   | 18.5                        | 1                                 | 136                                 |
| 1015   | 2011 | 11    | 24  | 14:00 | -5.5                            | -7.0        | -6.3        | 24.3                     | 9                       | 71.1                 | 14.1                                  | 6.4                         | 1                                 | 135                                 |
| 1016   | 2011 | 11    | 27  | 5:55  | 2.0                             | 0.0         | 1.0         | 96.3                     | 10                      | 253.4                | 3.9                                   | 25.3                        | 1                                 | 138                                 |
| 1017   | 2011 | 11    | 27  | 14:00 | 1.0                             | -1.5        | -0.3        | 57.5                     | 9                       | 168.1                | 5.9                                   | 15.1                        | 1                                 | 142                                 |
| 1018   | 2011 | 11    | 29  | 13:35 | -4.0                            | -7.0        | -5.5        | 18.9                     | 7                       | 71.1                 | 14.1                                  | 5.0                         | 1                                 | 139                                 |
| 1019   | 2011 | 11    | 30  | 6:10  | -4.0                            | -8.5        | -6.3        | 13.3                     | 5                       | 70.0                 | 14.3                                  | 3.5                         | 2                                 | 140                                 |
| 1020   | 2011 | 12    | 15  | 6:15  | -4.0                            | -6.5        | -5.3        | 16.3                     | 5                       | 85.8                 | 11.7                                  | 4.3                         | 3                                 | 123                                 |
| 1021   | 2011 | 12    | 18  | 6:15  | 3.5                             | -4.0        | -0.3        | 24.2                     | 7                       | 91.0                 | 11.0                                  | 6.4                         | 2                                 | 124                                 |
| 1022   | 2011 | 12    | 24  | 5:50  | -0.5                            | -2.5        | -1.5        | 35.0                     | 13                      | 70.9                 | 14.1                                  | 9.2                         | 3                                 | 130                                 |
| 1023   | 2011 | 12    | 24  | 14:45 | 0.5                             | -1.5        | -0.5        | 21.0                     | 6                       | 92.1                 | 10.9                                  | 5.5                         | 3                                 | 135                                 |
| 1024   | 2011 | 12    | 25  | 13:39 | 0.5                             | -3.5        | -1.5        | 38.8                     | 17                      | 60.1                 | 16.6                                  | 10.2                        | 3                                 | 150                                 |
| 1025   | 2011 | 12    | 27  | 5:40  | -2.5                            | -5.5        | -4.0        | 39.8                     | 11                      | 95.2                 | 10.5                                  | 10.5                        | 3                                 | 156                                 |
| 1026   | 2011 | 12    | 28  | 5:40  | 1.0                             | -2.0        | -0.5        | 76.3                     | 21                      | 95.6                 | 10.5                                  | 20.1                        | 2                                 | 169                                 |
| 1027   | 2011 | 12    | 29  | 5:45  | 0.0                             | -4.5        | -2.3        | 77.6                     | 16                      | 127.6                | 7.8                                   | 20.4                        | 2                                 | 177                                 |
| 1028   | 2011 | 12    | 30  | 5:40  | -2.0                            | -6.0        | -4.0        | 46.0                     | 10                      | 121.1                | 8.3                                   | 12.1                        | 3                                 | 179                                 |
| 1029   | 2012 | 1     | 3   | 13:35 | -1.0                            | -3.0        | -2.0        | 37.9                     | 11                      | 90.7                 | 11.0                                  | 10.0                        | 3                                 | 178                                 |
| 1030   | 2012 | 1     | 4   | 5:40  | 0.0                             | -1.0        | -0.5        | 118.2                    | 25                      | 124.4                | 8.0                                   | 31.1                        | 3                                 | 198                                 |
| 1031   | 2012 | 1     | 4   | 14:10 | 1.5                             | -1.0        | 0.3         | 107.0                    | 19                      | 148.2                | 6.7                                   | 28.2                        | 3                                 | 212                                 |
| 1032   | 2012 | 1     | 5   | 5:45  | 1.5                             | -3.5        | -1.0        | 59.3                     | 10                      | 156.1                | 6.4                                   | 15.6                        | 1                                 | 210                                 |
| 1033   | 2012 | 1     | 9   | 5:40  | 2.0                             | -0.5        | 0.8         | 38.4                     | 7                       | 144.4                | 6.9                                   | 10.1                        | 3                                 | 201                                 |
| 1034   | 2012 | 1     | 21  | 5:45  | -0.5                            | -2.0        | -1.3        | 69.0                     | 19                      | 95.6                 | 10.5                                  | 18.2                        | 2                                 | 215                                 |

| Sample | Year | Month | Day | Time  | Sample Interval<br>Temperatures |             |             | Snow<br>Sample<br>Weight | Snow<br>Sample<br>Depth | Snow<br>Density      | Snow<br>Depth<br>to<br>Water<br>Depth | Snow<br>Water<br>Equivalent | Air<br>Flow<br>Type               | Depth<br>of<br>Snow<br>on<br>Ground |
|--------|------|-------|-----|-------|---------------------------------|-------------|-------------|--------------------------|-------------------------|----------------------|---------------------------------------|-----------------------------|-----------------------------------|-------------------------------------|
|        |      |       |     |       | Max<br>(LST)                    | Min<br>(°C) | Avg<br>(°C) | (g)                      | (cm)                    | (kg/m <sup>3</sup> ) | Ratio                                 | (mm H <sub>2</sub> O)       | Inflow =1<br>Outflow=2<br>Other=3 | (cm)                                |
| 1035   | 2012 | 1     | 23  | 5:45  | -4.5                            | -8.0        | -6.3        | 64.3                     | 21                      | 80.6                 | 12.4                                  | 16.9                        | 1                                 | 229                                 |
| 1036   | 2012 | 1     | 23  | 14:00 | -4.5                            | -7.0        | -5.8        | 16.4                     | 5                       | 86.3                 | 11.6                                  | 4.3                         | 1                                 | 232                                 |
| 1037   | 2012 | 1     | 24  | 6:00  | -4.0                            | -6.0        | -5.0        | 21.7                     | 6                       | 95.2                 | 10.5                                  | 5.7                         | 3                                 | 231                                 |
| 1038   | 2012 | 1     | 24  | 14:00 | -3.0                            | -6.0        | -4.5        | 60.8                     | 14                      | 114.3                | 8.8                                   | 16.0                        | 3                                 | 245                                 |
| 1039   | 2012 | 1     | 26  | 6:15  | -3.5                            | -7.0        | -5.3        | 34.1                     | 12                      | 74.8                 | 13.4                                  | 9.0                         | 1                                 | 248                                 |
| 1040   | 2012 | 1     | 29  | 5:50  | 1.5                             | -2.0        | -0.3        | 52.0                     | 9                       | 152.0                | 6.6                                   | 13.7                        | 3                                 | 244                                 |
| 1041   | 2012 | 1     | 29  | 13:45 | 1.0                             | 0.0         | 0.5         | 32.6                     | 10                      | 85.8                 | 11.7                                  | 8.6                         | 3                                 | 251                                 |
| 1042   | 2012 | 1     | 31  | 6:10  | -2.5                            | -4.0        | -3.3        | 20.1                     | 8                       | 66.1                 | 15.1                                  | 5.3                         | 3                                 | 248                                 |
| 1043   | 2012 | 2     | 1   | 6:00  | -2.0                            | -4.0        | -3.0        | 45.3                     | 14                      | 85.2                 | 11.7                                  | 11.9                        | 3                                 | 256                                 |
| 1044   | 2012 | 2     | 16  | 14:10 | -3.0                            | -5.0        | -4.0        | 14.2                     | 5                       | 74.5                 | 13.4                                  | 3.7                         | 3                                 | 226                                 |
| 1045   | 2012 | 2     | 18  | 5:45  | -0.5                            | -8.0        | -4.3        | 82.3                     | 25                      | 86.6                 | 11.5                                  | 21.7                        | 3                                 | 250                                 |
| 1046   | 2012 | 2     | 24  | 5:45  | -4.5                            | -8.0        | -6.3        | 20.0                     | 7                       | 75.2                 | 13.3                                  | 5.3                         | 3                                 | 244                                 |
| 1047   | 2012 | 2     | 24  | 13:45 | -4.5                            | -5.0        | -4.8        | 61.5                     | 21                      | 77.1                 | 13.0                                  | 16.2                        | 3                                 | 265                                 |
| 1048   | 2012 | 2     | 25  | 5:45  | -4.0                            | -5.5        | -4.8        | 37.7                     | 12                      | 82.7                 | 12.1                                  | 9.9                         | 3                                 | 266                                 |
| 1049   | 2012 | 2     | 26  | 6:15  | -3.0                            | -12.5       | -7.8        | 21.5                     | 10                      | 56.6                 | 17.7                                  | 5.7                         | 2                                 | 270                                 |
| 1050   | 2012 | 2     | 29  | 6:05  | -6.0                            | -8.0        | -7.0        | 32.7                     | 10                      | 86.1                 | 11.6                                  | 8.6                         | 3                                 | 268                                 |
| 1051   | 2012 | 3     | 5   | 5:45  | -1.0                            | -3.5        | -2.3        | 61.0                     | 16                      | 100.3                | 10.0                                  | 16.1                        | 2                                 | 270                                 |
| 1052   | 2012 | 3     | 6   | 6:15  | -8.0                            | -16.0       | -12.0       | 26.8                     | 7                       | 100.8                | 9.9                                   | 7.1                         | 2                                 | 277                                 |
| 1053   | 2012 | 3     | 9   | 6:10  | 6.0                             | -2.0        | 2.0         | 23.0                     | 14                      | 43.2                 | 23.1                                  | 6.1                         | 3                                 | 276                                 |
| 1054   | 2012 | 3     | 9   | 13:48 | -1.5                            | -2.5        | -2.0        | 51.5                     | 21                      | 64.5                 | 15.5                                  | 13.6                        | 3                                 | 293                                 |
| 1055   | 2012 | 3     | 10  | 5:40  | -1.5                            | -3.0        | -2.3        | 35.2                     | 10                      | 92.6                 | 10.8                                  | 9.3                         | 3                                 | 293                                 |
| 1056   | 2012 | 3     | 11  | 5:40  | -2.5                            | -5.0        | -3.8        | 61.4                     | 26                      | 62.1                 | 16.1                                  | 16.2                        | 3                                 | 310                                 |
| 1057   | 2012 | 3     | 12  | 6:20  | -5.0                            | -9.0        | -7.0        | 22.0                     | 9                       | 64.3                 | 15.5                                  | 5.8                         | 3                                 | 309                                 |
| 1058   | 2012 | 3     | 12  | 13:49 | -5.0                            | -7.0        | -6.0        | 72.0                     | 23                      | 82.4                 | 12.1                                  | 18.9                        | 3                                 | 340                                 |
| 1059   | 2012 | 3     | 13  | 5:45  | -4.5                            | -10.0       | -7.3        | 61.3                     | 22                      | 73.3                 | 13.6                                  | 16.1                        | 3                                 | 340                                 |
| 1060   | 2012 | 3     | 14  | 14:00 | -5.0                            | -9.0        | -7.0        | 21.0                     | 10                      | 55.3                 | 18.1                                  | 5.5                         | 3                                 | 336                                 |
| 1061   | 2012 | 3     | 15  | 5:50  | -3.0                            | -5.0        | -4.0        | 56.7                     | 24                      | 62.2                 | 16.1                                  | 14.9                        | 3                                 | 355                                 |
| 1062   | 2012 | 3     | 15  | 14:00 | -1.5                            | -3.0        | -2.3        | 52.5                     | 15                      | 92.1                 | 10.9                                  | 13.8                        | 3                                 | 362                                 |
| 1063   | 2012 | 3     | 16  | 5:45  | -1.5                            | -7.5        | -4.5        | 29.0                     | 6                       | 127.2                | 7.9                                   | 7.6                         | 3                                 | 355                                 |
| 1064   | 2012 | 3     | 19  | 6:15  | -5.0                            | -11.5       | -8.3        | 23.0                     | 9                       | 67.3                 | 14.9                                  | 6.1                         | 3                                 | 347                                 |
| 1065   | 2012 | 3     | 20  | 6:00  | -5.5                            | -8.5        | -7.0        | 46.0                     | 15                      | 80.7                 | 12.4                                  | 12.1                        | 1                                 | 354                                 |
| 1066   | 2012 | 3     | 20  | 14:00 | -5.0                            | -7.0        | -6.0        | 42.0                     | 10                      | 110.5                | 9.0                                   | 11.1                        | 1                                 | 345                                 |
| 1067   | 2012 | 3     | 28  | 5:40  | 1.0                             | -2.0        | -0.5        | 32.0                     | 11                      | 76.6                 | 13.1                                  | 8.4                         | 3                                 | 326                                 |
| 1068   | 2012 | 3     | 28  | 14:05 | -1.0                            | -3.0        | -2.0        | 73.3                     | 25                      | 77.2                 | 13.0                                  | 19.3                        | 3                                 | 346                                 |
| 1069   | 2012 | 3     | 29  | 5:45  | -1.0                            | -4.0        | -2.5        | 101.7                    | 33                      | 81.1                 | 12.3                                  | 26.8                        | 3                                 | 371                                 |
| 1070   | 2012 | 3     | 29  | 14:00 | -2.5                            | -4.0        | -3.3        | 20.7                     | 7                       | 77.8                 | 12.9                                  | 5.4                         | 3                                 | 371                                 |
| 1071   | 2012 | 3     | 31  | 6:15  | -3.5                            | -11.0       | -7.3        | 25.0                     | 6                       | 109.6                | 9.1                                   | 6.6                         | 2                                 | 366                                 |
| 1072   | 2012 | 4     | 3   | 5:40  | -1.0                            | -2.0        | -1.5        | 119.0                    | 41                      | 76.4                 | 13.1                                  | 31.3                        | 3                                 | 394                                 |
| 1073   | 2012 | 4     | 3   | 14:00 | -2.0                            | -2.5        | -2.3        | 77.8                     | 22                      | 93.1                 | 10.7                                  | 20.5                        | 3                                 | 409                                 |
| 1074   | 2012 | 4     | 20  | 5:45  | 0.0                             | -3.5        | -1.8        | 70.0                     | 20                      | 92.1                 | 10.9                                  | 18.4                        | 3                                 | 339                                 |

| Sample | Year | Month | Day | Time  | Sample Interval<br>Temperatures |       |       | Snow<br>Sample<br>Weight | Snow<br>Sample<br>Depth | Snow<br>Density      | Snow<br>Depth<br>to<br>Water<br>Depth | Snow<br>Water<br>Equivalent | Air<br>Flow<br>Type<br>Inflow =1<br>Outflow=2<br>Other=3 | Depth<br>of<br>Snow<br>on<br>Ground<br>(cm) |
|--------|------|-------|-----|-------|---------------------------------|-------|-------|--------------------------|-------------------------|----------------------|---------------------------------------|-----------------------------|----------------------------------------------------------|---------------------------------------------|
|        |      |       |     |       | Max                             | Min   | Avg   |                          |                         |                      |                                       |                             |                                                          |                                             |
|        |      |       |     |       | (LST)                           | (°C)  | (°C)  | (g)                      | (cm)                    | (kg/m <sup>3</sup> ) | Ratio                                 | (mm H <sub>2</sub> O)       |                                                          |                                             |
| 1075   | 2012 | 11    | 17  | 6:20  | 1.0                             | -2.5  | -0.8  | 42.0                     | 10                      | 110.5                | 9.0                                   | 11.1                        | 3                                                        | 32                                          |
| 1076   | 2012 | 11    | 17  | 13:50 | 1.0                             | -1.0  | 0.0   | 75.3                     | 15                      | 132.1                | 7.6                                   | 19.8                        | 3                                                        | 47                                          |
| 1077   | 2012 | 11    | 18  | 14:10 | -2.5                            | -4.0  | -3.3  | 20.7                     | 10                      | 54.5                 | 18.4                                  | 5.4                         | 3                                                        | 65                                          |
| 1078   | 2012 | 11    | 19  | 6:35  | -1.0                            | -3.0  | -2.0  | 83.1                     | 24                      | 91.1                 | 11.0                                  | 21.9                        | 3                                                        | 79                                          |
| 1079   | 2012 | 11    | 21  | 6:20  | -3.0                            | -6.0  | -4.5  | 65.5                     | 17                      | 101.4                | 9.9                                   | 17.2                        | 3                                                        | 95                                          |
| 1080   | 2012 | 11    | 21  | 14:00 | -3.5                            | -5.0  | -4.3  | 29.3                     | 8                       | 96.2                 | 10.4                                  | 7.7                         | 3                                                        | 100                                         |
| 1081   | 2012 | 11    | 23  | 6:30  | -1.5                            | -4.5  | -3.0  | 107.7                    | 31                      | 91.4                 | 10.9                                  | 28.3                        | 3                                                        | 121                                         |
| 1082   | 2012 | 11    | 24  | 6:05  | 0.0                             | -5.0  | -2.5  | 27.0                     | 7                       | 101.5                | 9.9                                   | 7.1                         | 3                                                        | 117                                         |
| 1083   | 2012 | 11    | 29  | 6:20  | 2.0                             | 0.0   | 1.0   | 35.2                     | 8                       | 115.8                | 8.6                                   | 9.3                         | 2                                                        | 103                                         |
| 1084   | 2012 | 11    | 29  | 14:10 | 1.0                             | -0.5  | 0.3   | 66.0                     | 15                      | 115.8                | 8.6                                   | 17.4                        | 2                                                        | 115                                         |
| 1085   | 2012 | 11    | 30  | 6:00  | 1.0                             | -1.5  | -0.3  | 18.0                     | 7                       | 67.7                 | 14.8                                  | 4.7                         | 2                                                        | 117                                         |
| 1086   | 2012 | 11    | 30  | 14:05 | 0.0                             | -1.0  | -0.5  | 44.2                     | 14                      | 83.1                 | 12.0                                  | 11.6                        | 2                                                        | 130                                         |
| 1087   | 2012 | 12    | 1   | 6:10  | 0.0                             | -1.0  | -0.5  | 62.0                     | 24                      | 68.0                 | 14.7                                  | 16.3                        | 3                                                        | 142                                         |
| 1088   | 2012 | 12    | 1   | 13:40 | -1.0                            | -3.0  | -2.0  | 53.0                     | 16                      | 87.2                 | 11.5                                  | 13.9                        | 3                                                        | 152                                         |
| 1089   | 2012 | 12    | 2   | 5:50  | -1.5                            | -3.0  | -2.3  | 74.4                     | 30                      | 65.3                 | 15.3                                  | 19.6                        | 3                                                        | 170                                         |
| 1090   | 2012 | 12    | 2   | 13:45 | -2.5                            | -3.5  | -3.0  | 17.7                     | 7                       | 66.5                 | 15.0                                  | 4.7                         | 3                                                        | 168                                         |
| 1091   | 2012 | 12    | 4   | 6:00  | -1.0                            | -3.5  | -2.3  | 57.7                     | 20                      | 75.9                 | 13.2                                  | 15.2                        | 3                                                        | 189                                         |
| 1092   | 2012 | 12    | 5   | 5:50  | -2.5                            | -6.5  | -4.5  | 32.5                     | 8                       | 106.9                | 9.4                                   | 8.6                         | 1                                                        | 170                                         |
| 1093   | 2012 | 12    | 7   | 6:15  | -4.0                            | -6.5  | -5.3  | 16.7                     | 6                       | 73.2                 | 13.7                                  | 4.4                         | 3                                                        | 166                                         |
| 1094   | 2012 | 12    | 12  | 6:20  | -3.5                            | -7.5  | -5.5  | 30.3                     | 5                       | 159.5                | 6.3                                   | 8.0                         | 2                                                        | 158                                         |
| 1095   | 2012 | 12    | 14  | 6:15  | -3.5                            | -7.5  | -5.5  | 18.0                     | 7                       | 67.7                 | 14.8                                  | 4.7                         | 3                                                        | 156                                         |
| 1096   | 2012 | 12    | 14  | 13:40 | -7.0                            | -9.5  | -8.3  | 23.0                     | 10                      | 60.5                 | 16.5                                  | 6.1                         | 3                                                        | 156                                         |
| 1097   | 2012 | 12    | 15  | 14:00 | -6.5                            | -7.5  | -7.0  | 19.5                     | 7                       | 73.3                 | 13.6                                  | 5.1                         | 3                                                        | 161                                         |
| 1098   | 2012 | 12    | 16  | 5:45  | -6.0                            | -8.0  | -7.0  | 13.5                     | 7                       | 50.8                 | 19.7                                  | 3.6                         | 2                                                        | 163                                         |
| 1099   | 2012 | 12    | 16  | 13:45 | -7.0                            | -8.0  | -7.5  | 35.0                     | 10                      | 92.1                 | 10.9                                  | 9.2                         | 2                                                        | 163                                         |
| 1100   | 2012 | 12    | 17  | 5:45  | -7.0                            | -8.0  | -7.5  | 62.0                     | 20                      | 81.6                 | 12.3                                  | 16.3                        | 3                                                        | 174                                         |
| 1101   | 2012 | 12    | 19  | 6:20  | -8.5                            | -11.5 | -10.0 | 14.8                     | 7                       | 55.6                 | 18.0                                  | 3.9                         | 3                                                        | 175                                         |
| 1102   | 2012 | 12    | 19  | 14:10 | -5.0                            | -8.0  | -6.5  | 31.2                     | 12                      | 68.4                 | 14.6                                  | 8.2                         | 3                                                        | 185                                         |
| 1103   | 2012 | 12    | 20  | 5:50  | -4.5                            | -6.0  | -5.3  | 74.9                     | 34                      | 58.0                 | 17.2                                  | 19.7                        | 3                                                        | 204                                         |
| 1104   | 2012 | 12    | 20  | 14:00 | -4.0                            | -5.0  | -4.5  | 43.2                     | 14                      | 81.2                 | 12.3                                  | 11.4                        | 3                                                        | 211                                         |
| 1105   | 2012 | 12    | 21  | 5:45  | -5.0                            | -10.0 | -7.5  | 38.0                     | 15                      | 66.7                 | 15.0                                  | 10.0                        | 2                                                        | 212                                         |
| 1106   | 2012 | 12    | 23  | 5:45  | -4.5                            | -7.0  | -5.8  | 51.7                     | 18                      | 75.6                 | 13.2                                  | 13.6                        | 3                                                        | 215                                         |
| 1107   | 2012 | 12    | 26  | 6:00  | -4.0                            | -9.0  | -6.5  | 19.8                     | 7                       | 74.4                 | 13.4                                  | 5.2                         | 2                                                        | 201                                         |
| 1108   | 2012 | 12    | 26  | 14:15 | -3.5                            | -6.5  | -5.0  | 22.0                     | 10                      | 57.9                 | 17.3                                  | 5.8                         | 2                                                        | 200                                         |
| 1109   | 2013 | 1     | 6   | 5:40  | -1.5                            | -5.0  | -3.3  | 20.5                     | 8                       | 67.4                 | 14.8                                  | 5.4                         | 3                                                        | 178                                         |
| 1110   | 2013 | 1     | 7   | 6:05  | -3.5                            | -5.0  | -4.3  | 29.7                     | 9                       | 86.8                 | 11.5                                  | 7.8                         | 3                                                        | 184                                         |
| 1111   | 2013 | 1     | 8   | 13:50 | -6.0                            | -9.0  | -7.5  | 22.4                     | 10                      | 58.9                 | 17.0                                  | 5.9                         | 3                                                        | 191                                         |
| 1112   | 2013 | 1     | 9   | 5:50  | -0.5                            | -6.0  | -3.3  | 90.0                     | 32                      | 74.0                 | 13.5                                  | 23.7                        | 3                                                        | 214                                         |
| 1113   | 2013 | 1     | 10  | 6:10  | -4.0                            | -13.0 | -8.5  | 18.0                     | 6                       | 78.7                 | 12.7                                  | 4.7                         | 2                                                        | 210                                         |
| 1114   | 2013 | 1     | 25  | 5:50  | -2.5                            | -5.0  | -3.8  | 39.0                     | 11                      | 93.3                 | 10.7                                  | 10.3                        | 3                                                        | 194                                         |

| Sample | Year | Month | Day | Time  | Sample Interval<br>Temperatures |             |             | Snow<br>Sample<br>Weight | Snow<br>Sample<br>Depth | Snow<br>Density      | Snow<br>Depth<br>to<br>Water<br>Depth | Snow<br>Water<br>Equivalent | Air<br>Flow<br>Type              | Depth<br>of<br>Snow<br>on<br>Ground |
|--------|------|-------|-----|-------|---------------------------------|-------------|-------------|--------------------------|-------------------------|----------------------|---------------------------------------|-----------------------------|----------------------------------|-------------------------------------|
|        |      |       |     |       | Max<br>(LST)                    | Min<br>(°C) | Avg<br>(°C) | (g)                      | (cm)                    | (kg/m <sup>3</sup> ) | Ratio                                 | (mm H <sub>2</sub> O)       | Inflow=1<br>Outflow=2<br>Other=3 | (cm)                                |
| 1115   | 2013 | 1     | 26  | 6:15  | -3.0                            | -7.0        | -5.0        | 36.0                     | 10                      | 94.7                 | 10.6                                  | 9.5                         | 3                                | 190                                 |
| 1116   | 2013 | 2     | 5   | 6:10  | 0.0                             | -3.0        | -1.5        | 25.0                     | 8                       | 82.2                 | 12.2                                  | 6.6                         | 3                                | 189                                 |
| 1117   | 2013 | 2     | 6   | 5:50  | -2.0                            | -4.5        | -3.3        | 24.3                     | 7                       | 91.2                 | 11.0                                  | 6.4                         | 3                                | 191                                 |
| 1118   | 2013 | 2     | 7   | 5:50  | -3.0                            | -4.5        | -3.8        | 25.7                     | 9                       | 75.1                 | 13.3                                  | 6.8                         | 3                                | 197                                 |
| 1119   | 2013 | 2     | 7   | 13:50 | -3.0                            | -5.5        | -4.3        | 116.5                    | 10                      | 306.6                | 3.3                                   | 30.7                        | 3                                | 204                                 |
| 1120   | 2013 | 2     | 22  | 14:00 | -3.0                            | -5.0        | -4.0        | 62.7                     | 18                      | 91.7                 | 10.9                                  | 16.5                        | 1                                | 206                                 |
| 1121   | 2013 | 2     | 23  | 5:45  | -3.5                            | -8.0        | -5.8        | 13.7                     | 5                       | 72.1                 | 13.9                                  | 3.6                         | 3                                | 207                                 |
| 1122   | 2013 | 2     | 25  | 5:45  | -2.0                            | -5.0        | -3.5        | 63.6                     | 18                      | 93.0                 | 10.8                                  | 16.7                        | 1                                | 219                                 |
| 1123   | 2013 | 2     | 27  | 6:20  | -4.0                            | -9.0        | -6.5        | 20.8                     | 9                       | 60.8                 | 16.4                                  | 5.5                         | 3                                | 220                                 |
| 1124   | 2013 | 2     | 28  | 14:00 | 0.5                             | -7.0        | -3.3        | 29.3                     | 9                       | 85.7                 | 11.7                                  | 7.7                         | 3                                | 224                                 |
| 1125   | 2013 | 3     | 1   | 5:45  | 1.0                             | -0.5        | 0.3         | 98.5                     | 31                      | 83.6                 | 12.0                                  | 25.9                        | 3                                | 248                                 |
| 1126   | 2013 | 3     | 1   | 14:05 | 1.0                             | 0.0         | 0.5         | 75.7                     | 13                      | 153.2                | 6.5                                   | 19.9                        | 3                                | 255                                 |
| 1127   | 2013 | 3     | 12  | 5:50  | -1.0                            | -5.5        | -3.3        | 65.0                     | 18                      | 95.0                 | 10.5                                  | 17.1                        | 3                                | 257                                 |
| 1128   | 2013 | 3     | 12  | 13:50 | 2.0                             | -1.0        | 0.5         | 46.5                     | 14                      | 87.4                 | 11.4                                  | 12.2                        | 3                                | 270                                 |
| 1129   | 2013 | 3     | 13  | 5:50  | 2.0                             | 0.0         | 1.0         | 66.3                     | 11                      | 158.6                | 6.3                                   | 17.4                        | 3                                | 270                                 |
| 1130   | 2013 | 3     | 15  | 5:45  | 2.0                             | -1.5        | 0.3         | 26.0                     | 6                       | 114.0                | 8.8                                   | 6.8                         | 3                                | 262                                 |
| 1131   | 2013 | 3     | 17  | 5:50  | -2.0                            | -8.0        | -5.0        | 25.5                     | 8                       | 83.9                 | 11.9                                  | 6.7                         | 1                                | 260                                 |
| 1132   | 2013 | 3     | 18  | 6:20  | -3.5                            | -8.0        | -5.8        | 12.8                     | 5                       | 67.1                 | 14.9                                  | 3.4                         | 3                                | 259                                 |
| 1133   | 2013 | 3     | 20  | 5:45  | 0.5                             | -5.0        | -2.3        | 49.7                     | 18                      | 72.7                 | 13.8                                  | 13.1                        | 3                                | 270                                 |
| 1134   | 2013 | 3     | 20  | 14:00 | 0.0                             | -1.5        | -0.8        | 46.1                     | 14                      | 86.7                 | 11.5                                  | 12.1                        | 3                                | 280                                 |
| 1135   | 2013 | 4     | 6   | 5:45  | 2.5                             | -1.0        | 0.8         | 29.0                     | 10                      | 76.3                 | 13.1                                  | 7.6                         | 1                                | 239                                 |
| 1136   | 2013 | 4     | 13  | 5:45  | -1.5                            | -9.0        | -5.3        | 26.5                     | 10                      | 69.7                 | 14.3                                  | 7.0                         | 1                                | 255                                 |
| 1137   | 2013 | 11    | 19  | 6:20  | -2.0                            | -6.5        | -4.3        | 34.7                     | 10                      | 91.3                 | 11.0                                  | 9.1                         | M                                | 74                                  |
| 1138   | 2013 | 12    | 1   | 6:15  | 0.5                             | -1.5        | -0.5        | 31.2                     | 7                       | 117.3                | 8.5                                   | 8.2                         | M                                | 74                                  |
| 1139   | 2013 | 12    | 2   | 5:50  | -1.5                            | -7.5        | -4.5        | 59.7                     | 16                      | 98.2                 | 10.2                                  | 15.7                        | M                                | 87                                  |
| 1140   | 2013 | 12    | 20  | 6:15  | -6.5                            | -9.5        | -8.0        | 28.7                     | 8                       | 94.4                 | 10.6                                  | 7.6                         | M                                | 88                                  |
| 1141   | 2014 | 1     | 2   | 13:55 | 1.0                             | -0.5        | 0.3         | 48.6                     | 14                      | 91.4                 | 10.9                                  | 12.8                        | M                                | 105                                 |
| 1142   | 2014 | 1     | 3   | 5:45  | 0.0                             | -5.5        | -2.8        | 33.0                     | 10                      | 86.8                 | 11.5                                  | 8.7                         | M                                | 115                                 |
| 1143   | 2014 | 1     | 8   | 13:55 | 0.0                             | -1.0        | -0.5        | 19.6                     | 6                       | 86.0                 | 11.6                                  | 5.2                         | M                                | 111                                 |
| 1144   | 2014 | 1     | 10  | 5:45  | -2.0                            | -5.0        | -3.5        | 15.0                     | 6                       | 65.8                 | 15.2                                  | 3.9                         | M                                | 120                                 |
| 1145   | 2014 | 1     | 11  | 5:45  | 0.0                             | -5.0        | -2.5        | 200.0                    | 49                      | 107.4                | 9.3                                   | 52.6                        | M                                | 162                                 |
| 1146   | 2014 | 1     | 11  | 14:00 | -1.5                            | -4.0        | -2.8        | 38.5                     | 20                      | 50.7                 | 19.7                                  | 10.1                        | M                                | 176                                 |
| 1147   | 2014 | 1     | 12  | 6:00  | -6.5                            | -7.5        | -7.0        | 23.0                     | 5                       | 121.1                | 8.3                                   | 6.1                         | M                                | 169                                 |
| 1148   | 2014 | 2     | 10  | 14:00 | -1.5                            | -7.0        | -4.3        | 27.5                     | 9                       | 80.4                 | 12.4                                  | 7.2                         | M                                | 136                                 |
| 1149   | 2014 | 2     | 12  | 5:45  | -2.0                            | -5.0        | -3.5        | 100.0                    | 35                      | 75.2                 | 13.3                                  | 26.3                        | M                                | 173                                 |
| 1150   | 2014 | 2     | 13  | 6:00  | -3.0                            | -5.0        | -4.0        | 36.9                     | 13                      | 74.7                 | 13.4                                  | 9.7                         | M                                | 177                                 |
| 1151   | 2014 | 2     | 14  | 5:45  | -3.0                            | -5.5        | -4.3        | 22.0                     | 9                       | 64.3                 | 15.5                                  | 5.8                         | M                                | 178                                 |
| 1152   | 2014 | 2     | 17  | 5:50  | -4.5                            | -7.0        | -5.8        | 77.6                     | 21                      | 97.2                 | 10.3                                  | 20.4                        | M                                | 210                                 |
| 1153   | 2014 | 2     | 18  | 6:20  | -3.5                            | -7.5        | -5.5        | 34.0                     | 9                       | 99.4                 | 10.1                                  | 8.9                         | M                                | 213                                 |
| 1154   | 2014 | 2     | 18  | 14:00 | -4.0                            | -6.5        | -5.3        | 51.9                     | 18                      | 75.9                 | 13.2                                  | 13.7                        | M                                | 225                                 |

| Sample | Year | Month | Day | Time  | Sample Interval<br>Temperatures |             |             | Snow<br>Sample<br>Weight | Snow<br>Sample<br>Depth | Snow<br>Density      | Snow<br>Depth<br>to<br>Water<br>Depth | Snow<br>Water<br>Equivalent | Air<br>Flow<br>Type<br>Inflow =1<br>Outflow=2<br>Other=3 | Depth<br>of<br>Snow<br>on<br>Ground |
|--------|------|-------|-----|-------|---------------------------------|-------------|-------------|--------------------------|-------------------------|----------------------|---------------------------------------|-----------------------------|----------------------------------------------------------|-------------------------------------|
|        |      |       |     |       | Max<br>(LST)                    | Min<br>(°C) | Avg<br>(°C) | (g)                      | (cm)                    | (kg/m <sup>3</sup> ) | Ratio                                 | (mm H <sub>2</sub> O)       |                                                          | (cm)                                |
| 1155   | 2014 | 2     | 19  | 5:45  | -3.0                            | -9.5        | -6.3        | 27.0                     | 10                      | 71.1                 | 14.1                                  | 7.1                         | M                                                        | 228                                 |
| 1156   | 2014 | 2     | 20  | 6:15  | -5.0                            | -8.0        | -6.5        | 17.7                     | 9                       | 51.8                 | 19.3                                  | 4.7                         | M                                                        | 232                                 |
| 1157   | 2014 | 2     | 23  | 6:15  | -8.0                            | -12.5       | -10.3       | 15.3                     | 8                       | 50.2                 | 19.9                                  | 4.0                         | M                                                        | 218                                 |
| 1158   | 2014 | 2     | 23  | 13:38 | -8.5                            | -13.0       | -10.8       | 19.0                     | 19                      | 26.3                 | 38.0                                  | 5.0                         | M                                                        | 235                                 |
| 1159   | 2014 | 2     | 24  | 5:45  | -12.0                           | -13.5       | -12.8       | 17.0                     | 18                      | 24.9                 | 40.2                                  | 4.5                         | M                                                        | 242                                 |
| 1160   | 2014 | 3     | 3   | 5:45  | -2.0                            | -4.0        | -3.0        | 44.7                     | 12                      | 98.0                 | 10.2                                  | 11.8                        | M                                                        | 226                                 |
| 1161   | 2014 | 3     | 5   | 6:00  | 1.0                             | -4.0        | -1.5        | 15.9                     | 5                       | 83.7                 | 11.9                                  | 4.2                         | M                                                        | 225                                 |
| 1162   | 2014 | 3     | 5   | 13:45 | 2.0                             | -4.0        | -1.0        | 35.9                     | 9                       | 105.0                | 9.5                                   | 9.4                         | M                                                        | 229                                 |
| 1163   | 2014 | 3     | 6   | 6:00  | 2.5                             | -1.5        | 0.5         | 48.3                     | 16                      | 79.4                 | 12.6                                  | 12.7                        | M                                                        | 241                                 |
| 1164   | 2014 | 3     | 8   | 6:15  | 1.0                             | -1.5        | -0.3        | 15.5                     | 5                       | 81.6                 | 12.3                                  | 4.1                         | M                                                        | 232                                 |
| 1165   | 2014 | 3     | 9   | 5:45  | 1.0                             | -1.0        | 0.0         | 89.1                     | 25                      | 93.8                 | 10.7                                  | 23.4                        | M                                                        | 261                                 |
| 1166   | 2014 | 3     | 14  | 6:15  | 2.0                             | -3.0        | -0.5        | 31.5                     | 8                       | 103.6                | 9.7                                   | 8.3                         | M                                                        | 243                                 |
| 1167   | 2014 | 3     | 16  | 13:40 | -1.5                            | -2.5        | -2.0        | 33.5                     | 10                      | 88.2                 | 11.3                                  | 8.8                         | M                                                        | 266                                 |
| 1168   | 2014 | 3     | 17  | 5:45  | -1.5                            | -9.0        | -5.3        | 30.6                     | 10                      | 80.5                 | 12.4                                  | 8.1                         | M                                                        | 269                                 |
| 1169   | 2014 | 3     | 19  | 14:00 | -1.5                            | -4.0        | -2.8        | 22.0                     | 6                       | 96.5                 | 10.4                                  | 5.8                         | M                                                        | 264                                 |
| 1170   | 2014 | 3     | 26  | 5:50  | 2.0                             | -4.5        | -1.3        | 92.1                     | 31                      | 78.2                 | 12.8                                  | 24.2                        | M                                                        | 277                                 |
| 1171   | 2014 | 3     | 29  | 5:45  | 1.5                             | -3.5        | -1.0        | 87.4                     | 23                      | 100.0                | 10.0                                  | 23.0                        | M                                                        | 282                                 |
| 1172   | 2014 | 3     | 29  | 14:00 | -0.5                            | -3.5        | -2.0        | 31.0                     | 7                       | 116.5                | 8.6                                   | 8.2                         | M                                                        | 286                                 |
| 1173   | 2014 | 3     | 30  | 6:00  | 0.0                             | -4.0        | -2.0        | 46.0                     | 15                      | 80.7                 | 12.4                                  | 12.1                        | M                                                        | 295                                 |
| 1174   | 2014 | 4     | 4   | 5:45  | 0.0                             | -3.0        | -1.5        | 33.0                     | 12                      | 72.4                 | 13.8                                  | 8.7                         | M                                                        | 282                                 |
| 1175   | 2014 | 4     | 16  | 6:20  | 2.0                             | -2.5        | -0.3        | 14.0                     | 6                       | 61.4                 | 16.3                                  | 3.7                         | M                                                        | 241                                 |
| 1176   | 2014 | 4     | 17  | 5:50  | 2.0                             | -0.5        | 0.8         | 27.5                     | 6                       | 120.6                | 8.3                                   | 7.2                         | M                                                        | 243                                 |
| 1177   | 2014 | 11    | 23  | 6:20  | -1.5                            | -4.0        | -2.8        | 31.0                     | 11                      | 74.2                 | 13.5                                  | 8.2                         | M                                                        | 43                                  |
| 1178   | 2014 | 11    | 24  | 6:20  | -1.0                            | -3.5        | -2.3        | 33.3                     | 9                       | 97.4                 | 10.3                                  | 8.8                         | M                                                        | 49                                  |
| 1179   | 2014 | 11    | 25  | 6:25  | -0.5                            | -2.5        | -1.5        | 37.0                     | 10                      | 97.4                 | 10.3                                  | 9.7                         | M                                                        | 57                                  |
| 1180   | 2014 | 11    | 25  | 14:00 | -2.0                            | -2.5        | -2.3        | 31.2                     | 6                       | 136.8                | 7.3                                   | 8.2                         | M                                                        | 62                                  |
| 1181   | 2014 | 11    | 26  | 6:25  | 3.5                             | -3.5        | 0.0         | 92.0                     | 20                      | 121.1                | 8.3                                   | 24.2                        | M                                                        | 76                                  |
| 1182   | 2014 | 12    | 5   | 6:20  | 0.0                             | -2.5        | -1.3        | 18.8                     | 7                       | 70.7                 | 14.1                                  | 4.9                         | M                                                        | 58                                  |
| 1183   | 2014 | 12    | 9   | 6:25  | 2.5                             | 0.0         | 1.3         | 77.9                     | 9                       | 227.8                | 4.4                                   | 20.5                        | M                                                        | 66                                  |
| 1184   | 2014 | 12    | 11  | 5:55  | 1.5                             | -1.5        | 0.0         | 72.6                     | 10                      | 191.1                | 5.2                                   | 19.1                        | M                                                        | 78                                  |
| 1185   | 2014 | 12    | 11  | 14:00 | -1.5                            | -2.0        | -1.8        | 19.5                     | 8                       | 64.1                 | 15.6                                  | 5.1                         | M                                                        | 83                                  |
| 1186   | 2014 | 12    | 19  | 5:45  | 0.0                             | -2.5        | -1.3        | 40.1                     | 13                      | 81.2                 | 12.3                                  | 10.6                        | M                                                        | 105                                 |
| 1187   | 2014 | 12    | 20  | 6:00  | -2.5                            | -3.5        | -3.0        | 31.2                     | 12                      | 68.4                 | 14.6                                  | 8.2                         | M                                                        | 116                                 |
| 1188   | 2014 | 12    | 21  | 5:50  | 0.5                             | -1.5        | -0.5        | 85.5                     | 23                      | 97.8                 | 10.2                                  | 22.5                        | M                                                        | 135                                 |
| 1189   | 2014 | 12    | 22  | 5:15  | -2.0                            | -6.0        | -4.0        | 28.5                     | 8                       | 93.8                 | 10.7                                  | 7.5                         | M                                                        | 131                                 |
| 1190   | 2015 | 1     | 4   | 6:15  | -7.0                            | -7.5        | -7.3        | 14.0                     | 5                       | 73.7                 | 13.6                                  | 3.7                         | M                                                        | 119                                 |
| 1191   | 2015 | 1     | 5   | 6:20  | 0.5                             | -4.5        | -2.0        | 88.7                     | 21                      | 111.2                | 9.0                                   | 23.3                        | M                                                        | 149                                 |
| 1192   | 2015 | 1     | 5   | 14:00 | 2.0                             | -1.5        | 0.3         | 37.5                     | 6                       | 164.5                | 6.1                                   | 9.9                         | M                                                        | 154                                 |
| 1193   | 2015 | 1     | 16  | 5:40  | -0.5                            | -2.0        | -1.3        | 47.7                     | 13                      | 96.6                 | 10.4                                  | 12.6                        | M                                                        | 137                                 |
| 1194   | 2015 | 1     | 17  | 13:50 | -2.0                            | -4.5        | -3.3        | 28.9                     | 11                      | 69.1                 | 14.5                                  | 7.6                         | M                                                        | 144                                 |

| Sample | Year | Month | Day | Time  | Sample Interval<br>Temperatures |             |             | Snow<br>Sample<br>Weight | Snow<br>Sample<br>Depth | Snow<br>Density      | Snow<br>Depth<br>to<br>Water<br>Depth | Snow<br>Water<br>Equivalent | Air<br>Flow<br>Type<br>Inflow =1<br>Outflow=2<br>Other=3 | Depth<br>of<br>Snow<br>on<br>Ground |
|--------|------|-------|-----|-------|---------------------------------|-------------|-------------|--------------------------|-------------------------|----------------------|---------------------------------------|-----------------------------|----------------------------------------------------------|-------------------------------------|
|        |      |       |     |       | Max<br>(LST)                    | Min<br>(°C) | Avg<br>(°C) | (g)                      | (cm)                    | (kg/m <sup>3</sup> ) | Ratio                                 | (mm H <sub>2</sub> O)       |                                                          | (cm)                                |
| 1195   | 2015 | 1     | 18  | 5:45  | 0.5                             | -3.5        | -1.5        | 64.0                     | 11                      | 153.1                | 6.5                                   | 16.8                        | M                                                        | 154                                 |
| 1196   | 2015 | 2     | 5   | 6:20  | -1.0                            | -3.5        | -2.3        | 39.2                     | 13                      | 79.4                 | 12.6                                  | 10.3                        | M                                                        | 147                                 |
| 1197   | 2015 | 2     | 5   | 13:55 | 3.0                             | 0.0         | 1.5         | 59.6                     | 13                      | 120.6                | 8.3                                   | 15.7                        | M                                                        | 158                                 |
| 1198   | 2015 | 2     | 7   | 6:00  | 2.0                             | 0.5         | 1.3         | 70.2                     | 9                       | 205.3                | 4.9                                   | 18.5                        | M                                                        | 152                                 |
| 1199   | 2015 | 2     | 8   | 5:40  | 2.0                             | 0.0         | 1.0         | 34.5                     | 9                       | 100.9                | 9.9                                   | 9.1                         | M                                                        | 158                                 |
| 1200   | 2015 | 3     | 14  | 13:45 | 2.5                             | 0.5         | 1.5         | 41.5                     | 8                       | 136.5                | 7.3                                   | 10.9                        | M                                                        | 150                                 |
| 1201   | 2015 | 3     | 19  | 14:00 | 2.0                             | -0.5        | 0.8         | 50.1                     | 17                      | 77.6                 | 12.9                                  | 13.2                        | M                                                        | 169                                 |
| 1202   | 2015 | 3     | 21  | 5:40  | 2.0                             | 0.0         | 1.0         | 67.7                     | 18                      | 99.0                 | 10.1                                  | 17.8                        | M                                                        | 181                                 |
| 1203   | 2015 | 3     | 23  | 6:20  | 2.0                             | -4.5        | -1.3        | 19.2                     | 6                       | 84.2                 | 11.9                                  | 5.1                         | M                                                        | 185                                 |
| 1204   | 2015 | 3     | 29  | 5:40  | 1.5                             | -1.0        | 0.3         | 29.0                     | 9                       | 84.8                 | 11.8                                  | 7.6                         | M                                                        | 177                                 |
| 1205   | 2015 | 3     | 29  | 13:36 | 1.0                             | -1.5        | -0.3        | 56.7                     | 24                      | 62.2                 | 16.1                                  | 14.9                        | M                                                        | 200                                 |
| 1206   | 2015 | 4     | 4   | 5:55  | -0.5                            | -7.0        | -3.8        | 12.5                     | 6                       | 54.8                 | 18.2                                  | 3.3                         | M                                                        | 187                                 |
| 1207   | 2015 | 4     | 11  | 6:00  | -0.5                            | -6.0        | -3.3        | 37.2                     | 14                      | 69.9                 | 14.3                                  | 9.8                         | M                                                        | 200                                 |
| 1208   | 2015 | 4     | 13  | 13:45 | -0.5                            | -3.5        | -2.0        | 15.7                     | 7                       | 59.0                 | 16.9                                  | 4.1                         | M                                                        | 207                                 |
| 1209   | 2015 | 4     | 22  | 7:30  | 7.0                             | -3.5        | 1.8         | 20.0                     | 5                       | 105.3                | 9.5                                   | 5.3                         | M                                                        | 179                                 |
| 1210   | 2015 | 11    | 17  | 7:30  | 1.0                             | -4.5        | -1.8        | 74.5                     | 16                      | 122.5                | 8.2                                   | 19.6                        | M                                                        | 88                                  |
| 1211   | 2015 | 11    | 24  | 6:05  | -1.5                            | -10.0       | -5.8        | 24.4                     | 8                       | 80.3                 | 12.5                                  | 6.4                         | M                                                        | 82                                  |
| 1212   | 2015 | 12    | 2   | 5:50  | 0.5                             | -2.0        | -0.8        | 70.2                     | 7                       | 263.9                | 3.8                                   | 18.5                        | M                                                        | 86                                  |
| 1213   | 2015 | 12    | 4   | 5:45  | 1.5                             | -2.5        | -0.5        | 41.0                     | 6                       | 179.8                | 5.6                                   | 10.8                        | M                                                        | 90                                  |
| 1214   | 2015 | 12    | 5   | 5:50  | -1.5                            | -3.0        | -2.3        | 29.2                     | 10                      | 76.8                 | 13.0                                  | 7.7                         | M                                                        | 98                                  |
| 1215   | 2015 | 12    | 5   | 14:00 | -2.0                            | -3.0        | -2.5        | 51.2                     | 17                      | 79.3                 | 12.6                                  | 13.5                        | M                                                        | 110                                 |
| 1216   | 2015 | 12    | 6   | 5:50  | -0.5                            | -2.0        | -1.3        | 91.2                     | 23                      | 104.3                | 9.6                                   | 24.0                        | M                                                        | 126                                 |
| 1217   | 2015 | 12    | 7   | 5:45  | 1.0                             | -1.5        | -0.3        | 97.7                     | 22                      | 116.9                | 8.6                                   | 25.7                        | M                                                        | 138                                 |
| 1218   | 2015 | 12    | 8   | 5:55  | 1.5                             | -0.5        | 0.5         | 44.0                     | 16                      | 72.4                 | 13.8                                  | 11.6                        | M                                                        | 147                                 |
| 1219   | 2015 | 12    | 9   | 5:45  | 1.5                             | -2.0        | -0.3        | 38.5                     | 11                      | 92.1                 | 10.9                                  | 10.1                        | M                                                        | 144                                 |
| 1220   | 2015 | 12    | 10  | 14:10 | -2.5                            | -5.0        | -3.8        | 46.7                     | 20                      | 61.4                 | 16.3                                  | 12.3                        | M                                                        | 158                                 |
| 1221   | 2015 | 12    | 11  | 5:45  | -2.0                            | -5.0        | -3.5        | 54.0                     | 18                      | 78.9                 | 12.7                                  | 14.2                        | M                                                        | 165                                 |
| 1222   | 2015 | 12    | 12  | 13:50 | -3.0                            | -4.0        | -3.5        | 17.1                     | 5                       | 90.0                 | 11.1                                  | 4.5                         | M                                                        | 159                                 |
| 1223   | 2015 | 12    | 13  | 5:45  | -3.0                            | -4.0        | -3.5        | 103.5                    | 37                      | 73.6                 | 13.6                                  | 27.2                        | M                                                        | 185                                 |
| 1224   | 2015 | 12    | 14  | 6:15  | -2.0                            | -6.5        | -4.3        | 14.0                     | 6                       | 61.4                 | 16.3                                  | 3.7                         | M                                                        | 177                                 |
| 1225   | 2015 | 12    | 18  | 5:45  | -2.0                            | -5.5        | -3.8        | 62.0                     | 19                      | 85.9                 | 11.6                                  | 16.3                        | M                                                        | 175                                 |
| 1226   | 2015 | 12    | 19  | 5:45  | -5.0                            | -7.0        | -6.0        | 23.7                     | 9                       | 69.3                 | 14.4                                  | 6.2                         | M                                                        | 179                                 |
| 1227   | 2015 | 12    | 19  | 13:50 | -4.0                            | -6.5        | -5.3        | 68.5                     | 6                       | 64.0                 | 15.6                                  | 3.8                         | M                                                        | 184                                 |
| 1228   | 2015 | 12    | 20  | 5:45  | -4.0                            | -5.0        | -4.5        | 68.4                     | 28                      | 64.3                 | 15.6                                  | 18.0                        | M                                                        | 205                                 |
| 1229   | 2015 | 12    | 24  | 5:50  | -5.0                            | -9.0        | -7.0        | 42.7                     | 13                      | 86.4                 | 11.6                                  | 11.2                        | M                                                        | 191                                 |
| 1230   | 2015 | 12    | 27  | 6:15  | -7.0                            | -9.5        | -8.3        | 25.3                     | 8                       | 83.2                 | 12.0                                  | 6.7                         | M                                                        | 183                                 |
| 1231   | 2015 | 12    | 27  | 13:55 | -5.5                            | -8.0        | -6.8        | 21.0                     | 6                       | 92.1                 | 10.9                                  | 5.5                         | M                                                        | 188                                 |
| 1232   | 2016 | 1     | 13  | 6:00  | 1.0                             | -1.5        | -0.3        | 54.2                     | 16                      | 89.1                 | 11.2                                  | 14.3                        | M                                                        | 183                                 |
| 1233   | 2016 | 1     | 16  | 13:55 | 0.5                             | -3.5        | -1.5        | 35.5                     | 9                       | 103.8                | 9.6                                   | 9.3                         | M                                                        | 188                                 |
| 1234   | 2016 | 1     | 17  | 14:05 | -0.5                            | -2.5        | -1.5        | 86.2                     | 9                       | 252.0                | 4.0                                   | 22.7                        | M                                                        | 197                                 |

| Sample | Year | Month | Day | Time  | Sample Interval<br>Temperatures |             |             | Snow<br>Sample<br>Weight | Snow<br>Sample<br>Depth | Snow<br>Density      | Snow<br>Depth<br>to<br>Water<br>Depth | Snow<br>Water<br>Equivalent | Air<br>Flow<br>Type<br>Inflow =1<br>Outflow=2<br>Other=3 | Depth<br>of<br>Snow<br>on<br>Ground |
|--------|------|-------|-----|-------|---------------------------------|-------------|-------------|--------------------------|-------------------------|----------------------|---------------------------------------|-----------------------------|----------------------------------------------------------|-------------------------------------|
|        |      |       |     |       | Max<br>(LST)                    | Min<br>(°C) | Avg<br>(°C) | (g)                      | (cm)                    | (kg/m <sup>3</sup> ) | Ratio                                 | (mm H <sub>2</sub> O)       |                                                          | (cm)                                |
| 1235   | 2016 | 1     | 18  | 5:45  | -0.5                            | -3.5        | -2.0        | 32.8                     | 11                      | 78.5                 | 12.7                                  | 8.6                         | M                                                        | 203                                 |
| 1236   | 2016 | 1     | 19  | 5:45  | -1.0                            | -3.0        | -2.0        | 41.5                     | 18                      | 60.7                 | 16.5                                  | 10.9                        | M                                                        | 216                                 |
| 1237   | 2016 | 1     | 21  | 5:45  | 0.0                             | -4.0        | -2.0        | 36.2                     | 11                      | 86.6                 | 11.5                                  | 9.5                         | M                                                        | 208                                 |
| 1238   | 2016 | 1     | 21  | 14:05 | 0.5                             | 1.0         | 0.8         | 88.3                     | 13                      | 178.7                | 5.6                                   | 23.2                        | M                                                        | 220                                 |
| 1239   | 2016 | 1     | 22  | 14:05 | 1.0                             | -0.5        | 0.3         | 46.0                     | 8                       | 151.3                | 6.6                                   | 12.1                        | M                                                        | 211                                 |
| 1240   | 2016 | 1     | 29  | 13:50 | -3.0                            | -4.5        | -3.8        | 17.2                     | 6                       | 75.4                 | 13.3                                  | 4.5                         | M                                                        | 201                                 |
| 1241   | 2016 | 1     | 30  | 5:45  | -3.0                            | -7.0        | -5.0        | 23.1                     | 9                       | 67.5                 | 14.8                                  | 6.1                         | M                                                        | 207                                 |
| 1242   | 2016 | 1     | 31  | 5:45  | -4.0                            | -5.5        | -4.8        | 16.6                     | 7                       | 62.4                 | 16.0                                  | 4.4                         | M                                                        | 209                                 |
| 1243   | 2016 | 2     | 4   | 5:50  | -2.0                            | -4.5        | -3.3        | 32.2                     | 10                      | 84.7                 | 11.8                                  | 8.5                         | M                                                        | 208                                 |
| 1244   | 2016 | 2     | 5   | 13:45 | -0.5                            | -1.5        | -1.0        | 65.5                     | 20                      | 86.2                 | 11.6                                  | 17.2                        | M                                                        | 228                                 |
| 1245   | 2016 | 2     | 6   | 5:35  | -1.0                            | -5.5        | -3.3        | 198.9                    | 40                      | 130.9                | 7.6                                   | 52.3                        | M                                                        | 252                                 |
| 1246   | 2016 | 2     | 12  | 5:45  | 1.5                             | -2.0        | -0.3        | 47.0                     | 8                       | 154.6                | 6.5                                   | 12.4                        | M                                                        | 232                                 |
| 1247   | 2016 | 2     | 12  | 13:45 | 1.5                             | 0.0         | 0.8         | 35.6                     | 5                       | 187.4                | 5.3                                   | 9.4                         | M                                                        | 237                                 |
| 1248   | 2016 | 2     | 13  | 5:45  | 1.0                             | -3.0        | -1.0        | 23.0                     | 8                       | 75.7                 | 13.2                                  | 6.1                         | M                                                        | 242                                 |
| 1249   | 2016 | 2     | 14  | 5:45  | 0.0                             | -3.0        | -1.5        | 31.0                     | 9                       | 90.6                 | 11.0                                  | 8.2                         | M                                                        | 246                                 |
| 1250   | 2016 | 2     | 16  | 5:45  | 0.0                             | -3.5        | -1.8        | 62.4                     | 19                      | 86.4                 | 11.6                                  | 16.4                        | M                                                        | 260                                 |
| 1251   | 2016 | 2     | 17  | 6:12  | -1.0                            | -6.5        | -3.8        | 17.6                     | 6                       | 77.2                 | 13.0                                  | 4.6                         | M                                                        | 261                                 |
| 1252   | 2016 | 2     | 18  | 5:45  | 2.5                             | -1.5        | 0.5         | 49.4                     | 12                      | 108.3                | 9.2                                   | 13.0                        | M                                                        | 265                                 |
| 1253   | 2016 | 2     | 20  | 5:35  | 0.0                             | -6.0        | -3.0        | 20.4                     | 7                       | 76.7                 | 13.0                                  | 5.4                         | M                                                        | 265                                 |
| 1254   | 2016 | 2     | 28  | 13:45 | -0.5                            | -2.0        | -1.3        | 38.6                     | 16                      | 63.5                 | 15.8                                  | 10.2                        | M                                                        | 263                                 |
| 1255   | 2016 | 2     | 29  | 5:40  | -1.0                            | -7.5        | -4.3        | 40.5                     | 13                      | 82.0                 | 12.2                                  | 10.7                        | M                                                        | 267                                 |
| 1256   | 2016 | 3     | 1   | 14:00 | 0.0                             | -5.0        | -2.5        | 48.7                     | 21                      | 61.0                 | 16.4                                  | 12.8                        | M                                                        | 282                                 |
| 1257   | 2016 | 3     | 2   | 5:55  | 0.0                             | -3.5        | -1.8        | 33.4                     | 10                      | 87.9                 | 11.4                                  | 8.8                         | M                                                        | 287                                 |
| 1258   | 2016 | 3     | 3   | 5:45  | 1.0                             | -2.0        | -0.5        | 40.2                     | 10                      | 105.8                | 9.5                                   | 10.6                        | M                                                        | 284                                 |
| 1259   | 2016 | 3     | 4   | 6:15  | 0.0                             | -2.5        | -1.3        | 18.4                     | 5                       | 96.6                 | 10.4                                  | 4.8                         | M                                                        | 287                                 |
| 1260   | 2016 | 3     | 4   | 13:55 | -0.5                            | -1.0        | -0.8        | 48.5                     | 18                      | 70.9                 | 14.1                                  | 12.8                        | M                                                        | 302                                 |
| 1261   | 2016 | 3     | 5   | 5:45  | 0.0                             | -1.0        | -0.5        | 94.7                     | 32                      | 77.9                 | 12.8                                  | 24.9                        | M                                                        | 322                                 |
| 1262   | 2016 | 3     | 6   | 5:45  | 1.0                             | -2.0        | -0.5        | 48.7                     | 8                       | 160.2                | 6.2                                   | 12.8                        | M                                                        | 320                                 |
| 1263   | 2016 | 3     | 6   | 13:55 | -1.0                            | -2.0        | -1.5        | 33.3                     | 10                      | 87.6                 | 11.4                                  | 8.8                         | M                                                        | 327                                 |
| 1264   | 2016 | 3     | 7   | 13:55 | -1.0                            | -3.5        | -2.3        | 24.2                     | 8                       | 79.6                 | 12.6                                  | 6.4                         | M                                                        | 330                                 |
| 1265   | 2016 | 3     | 10  | 5:45  | 0.5                             | -3.5        | -1.5        | 136.2                    | 35                      | 102.4                | 9.8                                   | 35.8                        | M                                                        | 342                                 |
| 1266   | 2016 | 3     | 10  | 14:00 | -1.5                            | -2.0        | -1.8        | 71.5                     | 18                      | 104.5                | 9.6                                   | 18.8                        | M                                                        | 357                                 |
| 1267   | 2016 | 3     | 12  | 5:40  | -1.0                            | -2.5        | -1.8        | 94.5                     | 24                      | 103.6                | 9.7                                   | 24.9                        | M                                                        | 364                                 |
| 1268   | 2016 | 3     | 12  | 13:47 | -1.5                            | -4.0        | -2.8        | 35.1                     | 10                      | 92.4                 | 10.8                                  | 9.2                         | M                                                        | 367                                 |
| 1269   | 2016 | 3     | 13  | 5:50  | -1.0                            | -6.0        | -3.5        | 74.5                     | 18                      | 108.9                | 9.2                                   | 19.6                        | M                                                        | 375                                 |
| 1270   | 2016 | 3     | 14  | 5:45  | -3.0                            | -6.0        | -4.5        | 43.2                     | 14                      | 81.2                 | 12.3                                  | 11.4                        | M                                                        | 373                                 |
| 1271   | 2016 | 3     | 15  | 6:10  | -2.5                            | -7.5        | -5.0        | 13.0                     | 5                       | 68.2                 | 14.7                                  | 3.4                         | M                                                        | 370                                 |
| 1272   | 2016 | 3     | 21  | 5:45  | 3.0                             | -2.0        | 0.5         | 36.7                     | 12                      | 80.5                 | 12.4                                  | 9.7                         | M                                                        | 339                                 |
| 1273   | 2016 | 3     | 24  | 5:50  | 0.0                             | -4.0        | -2.0        | 36.6                     | 10                      | 96.3                 | 10.4                                  | 9.6                         | M                                                        | 334                                 |
| 1274   | 2016 | 3     | 27  | 5:45  | 3.0                             | -2.5        | 0.3         | 21.7                     | 6                       | 95.2                 | 10.5                                  | 5.7                         | M                                                        | 328                                 |

| Sample | Year | Month | Day  | Time | Sample Interval         |         |       | Snow     | Snow      | Snow    | Snow      | Snow       | Air  | Depth |     |
|--------|------|-------|------|------|-------------------------|---------|-------|----------|-----------|---------|-----------|------------|------|-------|-----|
|        |      |       |      |      | <div>Temperatures</div> |         |       | Sample   | Sample    | Density | Depth     | Water      | Flow | of    |     |
|        |      |       |      |      |                         |         |       | Weight   | Depth     |         | to        | Equivalent | Type |       |     |
|        |      |       |      |      | Max                     | Min     | Avg   | Water    |           |         | Inflow =1 | Ground     |      |       |     |
| (LST)  | (°C) | (°C)  | (°C) | (g)  | (cm)                    | (kg/m³) | Ratio | (mm H₂O) | Outflow=2 |         |           |            |      |       |     |
|        |      |       |      |      |                         |         |       |          |           | Other=3 |           |            |      |       |     |
| 1275   | 2016 |       | 4    | 13   | 5:40                    | 1.5     | -6.0  | -2.3     | 44.4      | 12      | 97.4      | 10.3       | 11.7 | M     | 281 |
